# Supplementary material for: 1,25-Dihydroxyvitamin D3 Suppresses Prognostic Survival Biomarkers Associated with Cell Cycle and Actin Organization in a Non-Malignant African American Prostate Cell Line
Source: MDPI journal article supplement (doi:10.3390/biology13050346), 2024-05-15
Supplement: s1 [file s1]

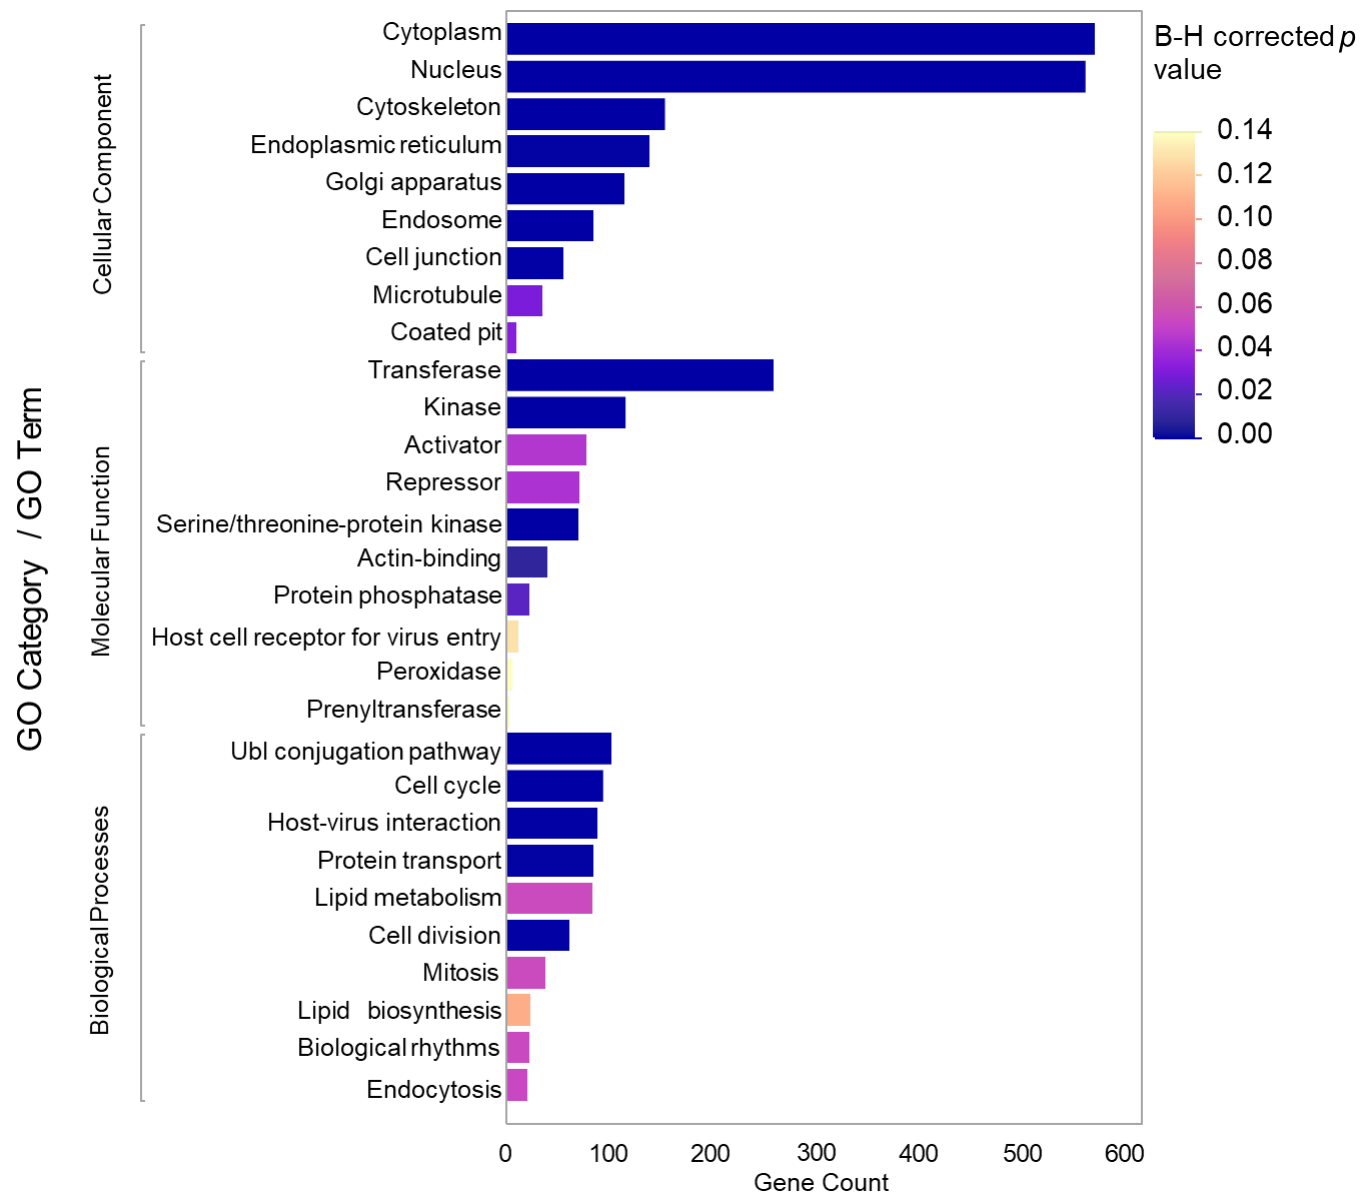

**Supplemental Figure S2. Gene Ontology (GO) analysis of RC-77N/E  $1\alpha,25(\text{OH})_2\text{D}_3$  treatment associated DEGs.** GO enrichment analysis of differentially expressed genes. Size of bar represents number of genes associated with a given GO term. Color scale indicates B-H corrected  $p < 0.05$  significant.
