# Supplementary material for: 1,25-Dihydroxyvitamin D3 Suppresses Prognostic Survival Biomarkers Associated with Cell Cycle and Actin Organization in a Non-Malignant African American Prostate Cell Line
Source: MDPI journal article supplement (doi:10.3390/biology13050346), 2024-05-15
Supplement: s1 [file s1]

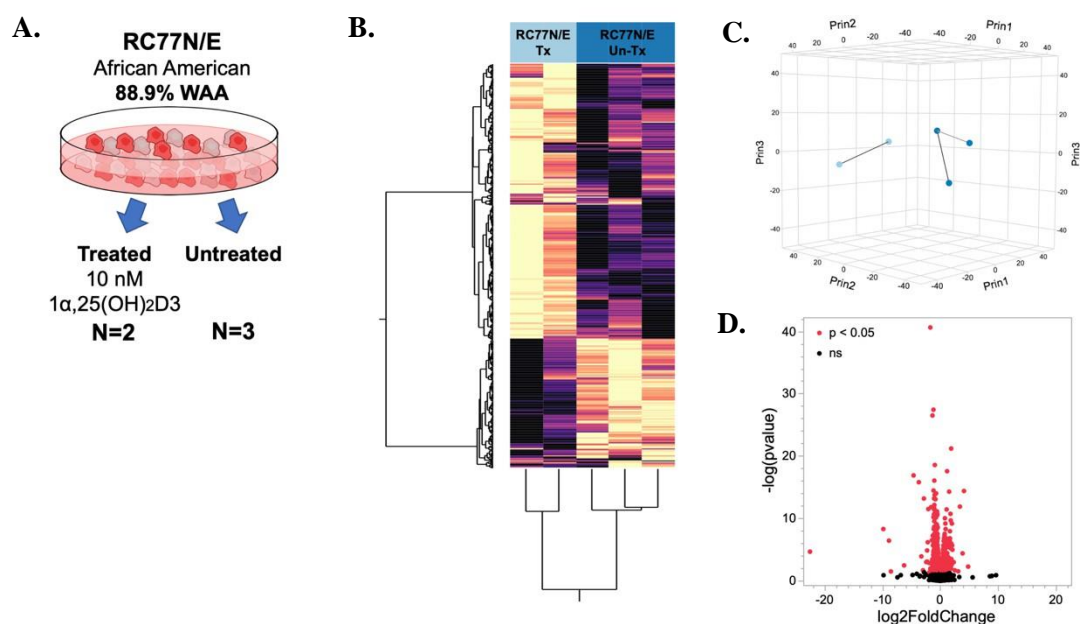

**Supplemental Figure S1. Differential gene expression analysis of  $1\alpha,25(\text{OH})_2\text{D}_3$  treated versus untreated RC-77N/E cell line replicates.** (A) Schematic of experimental design of Vitamin D treatment (10 nM  $1\alpha,25(\text{OH})_2\text{D}_3$ ) compared to untreated control replicates in the RC-77N/E African American prostate non-malignant cell line representing ~89% West African ancestry. (B) Unsupervised hierarchical clustering of 1601 differentially expressed genes (DEGs) between RC-77N/E treated (10 nM  $1\alpha,25(\text{OH})_2\text{D}_3$ ) vs untreated cells ( $\text{padj} < 0.05$ ). Rows represent genes, columns represent cell line replicates. Light blue annotated columns represent RC-77N/E treated replicates, and dark blue annotated columns represent RC-77N/E untreated replicates. (C) 3D Principal Component Analysis (PCA) plot of RC-77N/E cell line replicates of untreated (dark blue) and treated (light blue) samples. (D) Volcano plot showing the distribution of DEGs between RC-77N/E treated (10 nM  $1\alpha,25(\text{OH})_2\text{D}_3$ ) vs untreated cells. Dots in red indicate adjusted  $p$  value of  $< 0.05$  (**Red**).
