# Supplementary material for: 1,25-Dihydroxyvitamin D3 Suppresses Prognostic Survival Biomarkers Associated with Cell Cycle and Actin Organization in a Non-Malignant African American Prostate Cell Line
Source: Biology (Basel). 2024 May 15;13(5):346. doi: 10.3390/biology13050346 (PMC11118023; doi:10.3390/biology13050346)
Supplement: Supplementary file 1 [file biology-13-00346-s001.zip]

Archive with 12 entries (12 files):
- SF1_DEG analysis of RC-77NE cell line replicates.pdf
- SF2_GO analysis of associated DEGs in RC-77NE.pdf
- ST10_STRING Network Stats.xlsx
- ST1_RNASeq analysis of RC77NE 1,601 DEGs.xlsx
- ST2_IPA analysis Top20 canonical pathways.xlsx
- ST3_Pathway Studios gene-gene interactions impacting BP.xlsx
- ST4_Pathway Studios gene-gene interaction association with Disease and Function.xlsx
- ST5_87 DEGs with known VDREs and OSKM data.xlsx
- ST6_VDRE DEGs Top20 canonical pathways.xlsx
- ST7_ANLN-ECT2 expression in PCa Cohort.xlsx
- ST8_STRING Analaysis.xlsx
- ST9_STRING PPI ECT2 and ANLN.xlsx
