# Supplementary material for: 1,25-Dihydroxyvitamin D3 Suppresses Prognostic Survival Biomarkers Associated with Cell Cycle and Actin Organization in a Non-Malignant African American Prostate Cell Line
Source: Biology (Basel). 2024 May 15;13(5):346. doi: 10.3390/biology13050346 (PMC11118023; doi:10.3390/biology13050346)
Supplement: Supplementary file 1 [file biology-13-00346-s001.zip › ST1_RNASeq analysis of RC77NE 1,601 DEGs.xlsx]

## Sheet: Suppl Table S1
Supplemental Table S1: RNAseq analysis identify 1601 DEGs in RC77NE 1α,25(OH)2D3 treatment group (FDR < 0.05).
Ensembl Gene Name	Gene Name	log2FoldChange	padj
ENSG00000136485	DCAF7	-1.71321	2.43E-41
ENSG00000163110	PDLIM5	-1.17217	3.90E-28
ENSG00000166471	TMEM41B	-1.33789	3.33E-27
ENSG00000134982	APC	1.88788	6.72E-22
ENSG00000105810	CDK6	-0.931209	2.92E-19
ENSG00000160014	CALM3	1.18235	2.91E-18
ENSG00000257073	AC011933.1	-4.60569	1.37E-17
ENSG00000036054	TBC1D23	-1.02372	9.29E-17
ENSG00000132286	TIMM10B	-3.69853	1.69E-16
ENSG00000003056	M6PR	-1.15658	3.68E-15
ENSG00000117009	KMO	4.10258	4.32E-15
ENSG00000106460	TMEM106B	1.53984	5.54E-15
ENSG00000169213	RAB3B	-0.719483	1.04E-14
ENSG00000111799	COL12A1	-0.962484	1.83E-14
ENSG00000143398	PIP5K1A	-1.059	6.96E-14
ENSG00000103044	HAS3	-2.82392	6.96E-14
ENSG00000151012	SLC7A11	-0.826834	9.11E-14
ENSG00000139163	ETNK1	-1.01582	7.56E-13
ENSG00000204054	LINC00963	3.39721	1.38E-12
ENSG00000023445	BIRC3	-1.5852	1.70E-12
ENSG00000115221	ITGB6	-1.0347	2.60E-12
ENSG00000186951	PPARA	-2.06186	3.40E-12
ENSG00000196233	LCOR	1.10167	3.91E-12
ENSG00000125848	FLRT3	-1.04913	4.03E-12
ENSG00000198843	SELT	-0.769861	8.06E-12
ENSG00000108510	MED13	-0.555368	8.06E-12
ENSG00000168374	ARF4	-0.968883	1.66E-11
ENSG00000112365	ZBTB24	1.77111	2.01E-11
ENSG00000164190	NIPBL	-0.503594	2.01E-11
ENSG00000100744	GSKIP	-1.07928	2.38E-11
ENSG00000151914	DST	-0.508778	3.27E-11
ENSG00000116285	ERRFI1	-0.984616	4.49E-11
ENSG00000185697	MYBL1	-1.16599	6.84E-11
ENSG00000102189	EEA1	-0.744018	7.85E-11
ENSG00000171223	JUNB	0.807704	1.03E-10
ENSG00000177885	GRB2	1.81115	2.31E-10
ENSG00000167815	PRDX2	-1.02977	3.06E-10
ENSG00000019186	CYP24A1	2.02128	7.19E-10
ENSG00000120738	EGR1	0.886077	7.19E-10
ENSG00000018408	WWTR1	-0.668673	8.93E-10
ENSG00000151422	FER	-0.569019	1.16E-09
ENSG00000029993	HMGB3	-0.561523	1.74E-09
ENSG00000185009	AP3M1	-0.759126	1.89E-09
ENSG00000134970	TMED7	-1.04274	2.43E-09
ENSG00000107854	TNKS2	-0.548029	2.95E-09
ENSG00000100592	DAAM1	-0.763011	3.08E-09
ENSG00000117523	PRRC2C	-0.435831	3.08E-09
ENSG00000135913	USP37	-0.565453	5.47E-09
ENSG00000136026	CKAP4	0.932164	5.47E-09
ENSG00000258441	LINC00641	-1.12612	5.47E-09
ENSG00000125863	MKKS	-0.846436	5.47E-09
ENSG00000261557	EEF1A1P38	-9.83395	5.47E-09
ENSG00000165997	ARL5B	-0.934701	6.53E-09
ENSG00000116754	SRSF11	-0.655194	6.58E-09
ENSG00000143153	ATP1B1	-0.771514	7.02E-09
ENSG00000198612	COPS8	-0.746967	8.35E-09
ENSG00000187607	ZNF286A	1.6791	1.24E-08
ENSG00000165195	PIGA	-0.81326	1.54E-08
ENSG00000052802	MSMO1	-0.639521	2.53E-08
ENSG00000143669	LYST	-0.67189	2.66E-08
ENSG00000072364	AFF4	-0.581009	2.81E-08
ENSG00000167699	GLOD4	0.768597	3.21E-08
ENSG00000171634	BPTF	-0.467577	3.27E-08
ENSG00000134352	IL6ST	-1.02324	3.27E-08
ENSG00000075539	FRYL	-0.623813	3.31E-08
ENSG00000155304	HSPA13	-0.688037	4.97E-08
ENSG00000120063	GNA13	-0.533203	4.97E-08
ENSG00000101871	MID1	-0.730462	6.11E-08
ENSG00000110047	EHD1	-1.29422	6.43E-08
ENSG00000166004	KIAA1731	0.728847	6.71E-08
ENSG00000083857	FAT1	-0.670633	6.77E-08
ENSG00000112419	PHACTR2	-0.772617	6.96E-08
ENSG00000170017	ALCAM	-0.501133	7.85E-08
ENSG00000137502	RAB30	-0.973225	8.01E-08
ENSG00000137962	ARHGAP29	-0.58042	9.28E-08
ENSG00000128881	TTBK2	-0.699095	1.13E-07
ENSG00000138594	TMOD3	-0.626556	1.15E-07
ENSG00000115414	FN1	-0.426688	1.62E-07
ENSG00000070731	ST6GALNAC2	1.68112	1.68E-07
ENSG00000100219	XBP1	0.663511	1.68E-07
ENSG00000133858	ZFC3H1	-0.923259	1.73E-07
ENSG00000100889	PCK2	1.1394	1.86E-07
ENSG00000110958	PTGES3	-0.856732	2.48E-07
ENSG00000116717	GADD45A	-0.916955	2.57E-07
ENSG00000072415	MPP5	-0.647443	2.66E-07
ENSG00000081320	STK17B	-0.698042	2.84E-07
ENSG00000080298	RFX3	-0.798888	2.84E-07
ENSG00000107159	CA9	0.787883	2.84E-07
ENSG00000162772	ATF3	-0.857172	3.01E-07
ENSG00000143756	FBXO28	-0.583593	3.05E-07
ENSG00000118985	ELL2	-0.641909	3.08E-07
ENSG00000120948	TARDBP	-0.613399	3.08E-07
ENSG00000185129	PURA	-1.43042	3.36E-07
ENSG00000198964	SGMS1	-0.905715	3.42E-07
ENSG00000136235	GPNMB	1.64837	4.06E-07
ENSG00000153165	RGPD3	-8.86078	4.06E-07
ENSG00000187079	TEAD1	-0.649818	4.06E-07
ENSG00000110395	CBL	-0.512682	4.10E-07
ENSG00000006459	KDM7A	-0.588358	4.20E-07
ENSG00000257365	FNTB	-1.26669	4.40E-07
ENSG00000151726	ACSL1	0.60276	4.71E-07
ENSG00000164023	SGMS2	-0.733347	5.47E-07
ENSG00000198961	PJA2	-0.52986	5.51E-07
ENSG00000132640	BTBD3	-0.577233	6.30E-07
ENSG00000270898	ASB3	-2.155	7.12E-07
ENSG00000115504	EHBP1	-0.585769	7.20E-07
ENSG00000153006	SREK1IP1	-0.768551	7.31E-07
ENSG00000115419	GLS	-0.745869	7.38E-07
ENSG00000153395	LPCAT1	0.852649	7.55E-07
ENSG00000106392	C1GALT1	-0.820914	7.95E-07
ENSG00000063978	RNF4	-1.08812	8.84E-07
ENSG00000124107	SLPI	1.0055	9.49E-07
ENSG00000117143	UAP1	-0.69338	1.12E-06
ENSG00000166510	CCDC68	-1.12888	1.23E-06
ENSG00000259529	RP11-468E2.4	1.9174	1.24E-06
ENSG00000188158	NHS	-1.06314	1.44E-06
ENSG00000125968	ID1	1.29367	1.83E-06
ENSG00000150457	LATS2	-0.680467	1.83E-06
ENSG00000180263	FGD6	-0.966465	1.83E-06
ENSG00000143190	POU2F1	-0.787305	1.88E-06
ENSG00000132680	KIAA0907	-0.637185	1.95E-06
ENSG00000137575	SDCBP	-0.544337	2.03E-06
ENSG00000164211	STARD4	-0.460314	2.03E-06
ENSG00000129128	SPCS3	-0.725723	2.23E-06
ENSG00000106692	FKTN	-1.25547	2.29E-06
ENSG00000196850	PPTC7	-0.612609	2.29E-06
ENSG00000204623	ZNRD1-AS1	2.05457	2.34E-06
ENSG00000162695	SLC30A7	-0.727464	2.34E-06
ENSG00000166128	RAB8B	-0.937071	2.38E-06
ENSG00000090487	SPG21	0.540687	2.43E-06
ENSG00000169905	TOR1AIP2	-0.501717	2.52E-06
ENSG00000140299	BNIP2	-0.580282	2.53E-06
ENSG00000110723	EXPH5	-0.647957	2.85E-06
ENSG00000135373	EHF	-0.668604	2.97E-06
ENSG00000198604	BAZ1A	-0.511798	3.50E-06
ENSG00000164024	METAP1	-1.08045	3.51E-06
ENSG00000125826	RBCK1	0.759931	4.30E-06
ENSG00000178718	RPP25	1.37146	4.39E-06
ENSG00000122786	CALD1	-0.787726	4.83E-06
ENSG00000114850	SSR3	-0.640031	4.88E-06
ENSG00000249459	ZNF286B	-0.891886	5.16E-06
ENSG00000152223	EPG5	-0.517489	5.18E-06
ENSG00000060982	BCAT1	-0.642584	5.30E-06
ENSG00000182831	C16orf72	-0.577423	5.34E-06
ENSG00000120137	PANK3	-0.53745	5.37E-06
ENSG00000085224	ATRX	-0.505434	6.33E-06
ENSG00000246273	SBF2-AS1	1.7607	6.34E-06
ENSG00000115808	STRN	-0.42268	6.94E-06
ENSG00000066697	MSANTD3	0.892497	6.94E-06
ENSG00000143933	CALM2	-0.608808	6.94E-06
ENSG00000160551	TAOK1	-0.476776	7.81E-06
ENSG00000136603	SKIL	-0.880304	7.97E-06
ENSG00000069869	NEDD4	-0.545469	8.23E-06
ENSG00000197780	TAF13	-0.749283	8.47E-06
ENSG00000075223	SEMA3C	-0.796916	8.61E-06
ENSG00000115380	EFEMP1	-0.804898	8.95E-06
ENSG00000075426	FOSL2	0.503799	9.08E-06
ENSG00000198087	CD2AP	-0.635233	9.72E-06
ENSG00000102531	FNDC3A	-0.475131	9.78E-06
ENSG00000149289	ZC3H12C	-0.803072	1.02E-05
ENSG00000105974	CAV1	-0.748021	1.10E-05
ENSG00000260272	RP11-20I23.1	2.10349	1.15E-05
ENSG00000133818	RRAS2	-0.859445	1.15E-05
ENSG00000173575	CHD2	-0.491225	1.15E-05
ENSG00000170385	SLC30A1	-0.719935	1.25E-05
ENSG00000255302	EID1	-0.858208	1.26E-05
ENSG00000128923	FAM63B	-0.763976	1.26E-05
ENSG00000109452	INPP4B	-1.10533	1.29E-05
ENSG00000122884	P4HA1	-0.424228	1.35E-05
ENSG00000224078	SNHG14	-0.491424	1.35E-05
ENSG00000152104	PTPN14	-0.522091	1.36E-05
ENSG00000102471	NDFIP2	-0.639724	1.37E-05
ENSG00000114120	SLC25A36	-0.578329	1.39E-05
ENSG00000145782	ATG12	-0.637659	1.39E-05
ENSG00000265500	SENP3-EIF4A1	-2.26423	1.51E-05
ENSG00000164924	YWHAZ	-0.472913	1.56E-05
ENSG00000034677	RNF19A	-0.515041	1.57E-05
ENSG00000152894	PTPRK	-0.47456	1.68E-05
ENSG00000197614	MFAP5	-0.828401	1.68E-05
ENSG00000134250	NOTCH2	-0.554492	1.68E-05
ENSG00000153250	RBMS1	-0.569724	1.76E-05
ENSG00000035681	NSMAF	0.532779	1.83E-05
ENSG00000105971	CAV2	-0.784001	1.83E-05
ENSG00000177119	ANO6	-0.42391	1.89E-05
ENSG00000105976	MET	-0.34445	1.89E-05
ENSG00000074695	LMAN1	-0.514443	2.00E-05
ENSG00000183826	BTBD9	-1.12775	2.03E-05
ENSG00000113615	SEC24A	-0.780275	2.16E-05
ENSG00000139697	SBNO1	-0.427708	2.21E-05
ENSG00000167996	FTH1	0.84921	2.31E-05
ENSG00000187627	RGPD1	-22.5113	2.38E-05
ENSG00000117519	CNN3	-0.693963	2.55E-05
ENSG00000139496	NUPL1	-0.429135	2.55E-05
ENSG00000103257	SLC7A5	0.593311	2.57E-05
ENSG00000048649	RSF1	-0.477503	2.62E-05
ENSG00000149212	SESN3	-0.534807	2.63E-05
ENSG00000138032	PPM1B	-0.652676	2.67E-05
ENSG00000128512	DOCK4	-1.17999	2.75E-05
ENSG00000131746	TNS4	0.807381	2.83E-05
ENSG00000215301	DDX3X	-0.333665	2.83E-05
ENSG00000134531	EMP1	-0.61095	2.83E-05
ENSG00000176018	LYSMD3	-0.778056	2.96E-05
ENSG00000100201	DDX17	-0.403825	3.01E-05
ENSG00000170312	CDK1	-0.420863	3.07E-05
ENSG00000137770	CTDSPL2	-0.445966	3.15E-05
ENSG00000166068	SPRED1	-0.738854	3.16E-05
ENSG00000154639	CXADR	-0.585944	3.16E-05
ENSG00000065154	OAT	-0.471928	3.16E-05
ENSG00000143815	LBR	-0.482674	3.34E-05
ENSG00000117525	F3	-0.819614	3.37E-05
ENSG00000101361	NOP56	0.558041	3.46E-05
ENSG00000127314	RAP1B	-0.516475	3.53E-05
ENSG00000198862	LTN1	-0.530359	3.61E-05
ENSG00000111912	NCOA7	-0.626219	3.68E-05
ENSG00000057019	DCBLD2	-0.700749	3.78E-05
ENSG00000152492	CCDC50	-0.654096	3.92E-05
ENSG00000115963	RND3	-0.59303	3.92E-05
ENSG00000108352	RAPGEFL1	1.20451	4.09E-05
ENSG00000168172	HOOK3	-0.551447	4.15E-05
ENSG00000197329	PELI1	-0.57407	4.28E-05
ENSG00000047365	ARAP2	-0.466715	4.30E-05
ENSG00000214248	AC010336.1	3.85982	4.39E-05
ENSG00000067167	TRAM1	-0.588612	4.59E-05
ENSG00000119953	SMNDC1	-0.54984	4.60E-05
ENSG00000196937	FAM3C	-0.559641	4.60E-05
ENSG00000054267	ARID4B	-0.45883	4.60E-05
ENSG00000178726	THBD	0.954544	4.63E-05
ENSG00000163602	RYBP	-0.686576	4.94E-05
ENSG00000106537	TSPAN13	-0.588128	5.03E-05
ENSG00000075643	MOCOS	0.601249	5.05E-05
ENSG00000181555	SETD2	-0.476513	5.14E-05
ENSG00000091436	MLTK	-0.551936	5.14E-05
ENSG00000152952	PLOD2	-0.985788	5.14E-05
ENSG00000118200	CAMSAP2	-0.391625	5.19E-05
ENSG00000140830	TXNL4B	-0.791564	5.19E-05
ENSG00000137409	MTCH1	0.430214	5.21E-05
ENSG00000150991	UBC	0.679624	5.21E-05
ENSG00000023608	SNAPC1	-0.677834	5.24E-05
ENSG00000114374	USP9Y	-0.530064	5.24E-05
ENSG00000088387	DOCK9	-0.567094	5.62E-05
ENSG00000131016	AKAP12	-0.635048	5.66E-05
ENSG00000109171	SLAIN2	-0.480809	5.86E-05
ENSG00000143320	CRABP2	0.700752	5.86E-05
ENSG00000198265	HELZ	-0.587742	5.87E-05
ENSG00000144228	SPOPL	-0.639408	5.90E-05
ENSG00000168209	DDIT4	0.733618	6.03E-05
ENSG00000139977	NAA30	-0.557503	6.24E-05
ENSG00000156642	NPTN	-0.422218	6.30E-05
ENSG00000156802	ATAD2	-0.481774	6.39E-05
ENSG00000074181	NOTCH3	1.09594	7.06E-05
ENSG00000172432	GTPBP2	1.0549	7.83E-05
ENSG00000158023	WDR66	-0.684845	7.89E-05
ENSG00000091039	OSBPL8	-0.520984	7.89E-05
ENSG00000101935	AMMECR1	-0.584454	7.90E-05
ENSG00000105887	MTPN	-0.423976	7.90E-05
ENSG00000082641	NFE2L1	0.748882	7.90E-05
ENSG00000138434	SSFA2	-0.471009	7.90E-05
ENSG00000204599	TRIM39	-1.06773	7.92E-05
ENSG00000075213	SEMA3A	-0.727609	7.97E-05
ENSG00000134954	ETS1	-0.695375	7.97E-05
ENSG00000144810	COL8A1	-1.21586	7.98E-05
ENSG00000130733	YIPF2	0.924947	8.29E-05
ENSG00000139793	MBNL2	-0.693458	8.45E-05
ENSG00000124225	PMEPA1	-0.616912	8.50E-05
ENSG00000144824	PHLDB2	-0.562182	8.62E-05
ENSG00000109046	WSB1	-0.402447	9.40E-05
ENSG00000067208	EVI5	-0.5829	9.54E-05
ENSG00000143797	MBOAT2	-0.466213	0.000104878
ENSG00000076641	PAG1	-0.694763	0.000116982
ENSG00000117984	CTSD	0.535723	0.000118273
ENSG00000136492	BRIP1	-0.802809	0.000118682
ENSG00000127948	POR	0.507408	0.000119838
ENSG00000122257	RBBP6	-0.473926	0.000120121
ENSG00000168906	MAT2A	0.681726	0.000120121
ENSG00000106771	TMEM245	-0.368331	0.000121045
ENSG00000058085	LAMC2	-0.710684	0.000123801
ENSG00000140526	ABHD2	-0.555858	0.000126109
ENSG00000033867	SLC4A7	-0.421636	0.000126965
ENSG00000105855	ITGB8	-0.823806	0.000128365
ENSG00000182827	ACBD3	-0.504397	0.000128365
ENSG00000038382	TRIO	-0.464421	0.000128365
ENSG00000257218	GATC	-3.26268	0.000132933
ENSG00000147862	NFIB	-0.440783	0.00013929
ENSG00000179454	KLHL28	-0.775868	0.000141651
ENSG00000067064	IDI1	-0.87121	0.000144687
ENSG00000164715	LMTK2	-0.49633	0.00015346
ENSG00000124145	SDC4	-0.319542	0.00015346
ENSG00000135048	TMEM2	-0.509948	0.000154286
ENSG00000176046	NUPR1	1.34695	0.000155562
ENSG00000010404	IDS	-0.455732	0.000159121
ENSG00000165288	BRWD3	-0.498861	0.000159121
ENSG00000153317	ASAP1	-0.54052	0.000163092
ENSG00000126070	AGO3	-0.48963	0.000166629
ENSG00000174695	TMEM167A	-0.593452	0.000167903
ENSG00000172466	ZNF24	-0.455042	0.000168535
ENSG00000213047	DENND1B	-0.68439	0.000169504
ENSG00000221823	PPP3R1	-0.439553	0.000169831
ENSG00000261556	RP11-296I10.6	-0.681507	0.000169831
ENSG00000114933	INO80D	-0.595716	0.00017488
ENSG00000123091	RNF11	-0.493826	0.000179603
ENSG00000116701	NCF2	0.849953	0.000185322
ENSG00000122042	UBL3	-0.71193	0.000188463
ENSG00000196576	PLXNB2	0.455296	0.000195161
ENSG00000237264	FTH1P11	0.787733	0.00019638
ENSG00000119787	ATL2	-0.469718	0.000202285
ENSG00000152661	GJA1	-0.789555	0.000202285
ENSG00000056586	RC3H2	-0.338816	0.000208389
ENSG00000169826	CSGALNACT2	-0.534957	0.000211542
ENSG00000111816	FRK	-0.886027	0.000213521
ENSG00000153201	RANBP2	-0.334819	0.000222375
ENSG00000183735	TBK1	-0.549541	0.00022288
ENSG00000121621	KIF18A	-0.591897	0.000223029
ENSG00000182628	SKA2	-0.546515	0.000223615
ENSG00000165799	RNASE7	-0.449565	0.000224519
ENSG00000172115	CYCS	-0.491321	0.000224951
ENSG00000120549	KIAA1217	-0.433805	0.000225311
ENSG00000059758	CDK17	-0.444145	0.000231091
ENSG00000183287	CCBE1	-0.386056	0.000231091
ENSG00000221869	CEBPD	1.03635	0.00023433
ENSG00000148154	UGCG	-0.532011	0.000237078
ENSG00000135241	PNPLA8	-0.49475	0.000237078
ENSG00000126464	PRR12	0.711293	0.000237078
ENSG00000183283	DAZAP2	1.48547	0.000237373
ENSG00000144426	NBEAL1	-0.607582	0.00024601
ENSG00000072274	TFRC	0.883559	0.000246495
ENSG00000152377	SPOCK1	-0.366525	0.000248217
ENSG00000139734	DIAPH3	-0.530789	0.00025031
ENSG00000117500	TMED5	-0.556927	0.00025031
ENSG00000165646	SLC18A2	-0.806887	0.000258511
ENSG00000226564	FTH1P20	0.827558	0.00025889
ENSG00000196517	SLC6A9	1.06704	0.000260582
ENSG00000159140	SON	-0.337819	0.000262324
ENSG00000157625	TAB3	-0.466845	0.000281357
ENSG00000068878	PSME4	-0.629726	0.000282958
ENSG00000132466	ANKRD17	-0.332116	0.000284653
ENSG00000101752	MIB1	-0.453945	0.000284653
ENSG00000099250	NRP1	-0.45977	0.000291098
ENSG00000106299	WASL	-0.427268	0.00029297
ENSG00000078043	PIAS2	-0.777644	0.000301618
ENSG00000043093	DCUN1D1	-0.517729	0.000301618
ENSG00000137845	ADAM10	-0.531442	0.000315236
ENSG00000057294	PKP2	-0.716356	0.000319495
ENSG00000099875	MKNK2	0.398681	0.000320788
ENSG00000135338	LCA5	-0.590372	0.000320788
ENSG00000114346	ECT2	-0.561661	0.000325075
ENSG00000166225	FRS2	-0.552192	0.000330979
ENSG00000168159	RNF187	0.81198	0.000331427
ENSG00000155090	KLF10	-0.971958	0.000332703
ENSG00000205765	C5orf51	-0.526313	0.000333072
ENSG00000172548	NIPAL4	0.655941	0.000338109
ENSG00000120992	LYPLA1	-0.725168	0.000345627
ENSG00000172380	GNG12	-0.534641	0.000345851
ENSG00000163605	PPP4R2	-0.669004	0.00034714
ENSG00000049192	ADAMTS6	-1.32201	0.000347333
ENSG00000153130	SCOC	-1.12952	0.000357003
ENSG00000100033	PRODH	1.92384	0.000359565
ENSG00000187605	TET3	-0.388164	0.000375318
ENSG00000101191	DIDO1	-0.802353	0.000375318
ENSG00000072401	UBE2D1	-1.04513	0.000381689
ENSG00000135002	RFK	-0.68453	0.000401442
ENSG00000145495	6-Mar	-0.417897	0.000402091
ENSG00000104765	BNIP3L	-0.735963	0.000405487
ENSG00000198799	LRIG2	-0.611601	0.000405661
ENSG00000138182	KIF20B	-0.386043	0.000405661
ENSG00000128989	ARPP19	-0.367339	0.000405661
ENSG00000257315	ZBED6	-0.478781	0.000406892
ENSG00000176788	BASP1	-0.477402	0.000406892
ENSG00000175895	PLEKHF2	-0.589207	0.000406892
ENSG00000174799	CEP135	-0.633639	0.000412885
ENSG00000197045	GMFB	-0.880256	0.0004141
ENSG00000143742	SRP9	-0.545931	0.000430312
ENSG00000155130	MARCKS	-0.47367	0.000430329
ENSG00000134058	CDK7	-0.52092	0.000437885
ENSG00000151461	UPF2	-0.471219	0.000437885
ENSG00000173542	MOB1B	-0.629891	0.000449808
ENSG00000219507	FTH1P8	0.796563	0.000449808
ENSG00000170144	HNRNPA3	-0.543214	0.000449808
ENSG00000188647	PTAR1	-0.577973	0.000453195
ENSG00000143217	PVRL4	0.959948	0.000456925
ENSG00000177879	AP3S1	-0.573572	0.000457074
ENSG00000148943	LIN7C	-0.660893	0.000459899
ENSG00000241697	TMEFF1	-1.38136	0.000459899
ENSG00000104517	UBR5	-0.364434	0.000470606
ENSG00000066084	DIP2B	-0.354893	0.000474719
ENSG00000129422	MTUS1	-0.6269	0.000491418
ENSG00000103994	ZNF106	-0.515156	0.000492455
ENSG00000165389	SPTSSA	-0.72962	0.000507638
ENSG00000164951	PDP1	-0.400519	0.000508634
ENSG00000104142	VPS18	0.890897	0.000508781
ENSG00000062194	GPBP1	-0.446644	0.000515896
ENSG00000092621	PHGDH	0.40228	0.000517509
ENSG00000176986	SEC24C	-0.412611	0.000521277
ENSG00000185909	KLHDC8B	1.06566	0.000521277
ENSG00000154734	ADAMTS1	-0.645943	0.000533167
ENSG00000214193	SH3D21	-0.776403	0.000540515
ENSG00000145777	TSLP	-0.661544	0.000540515
ENSG00000180008	SOCS4	-0.465519	0.00055004
ENSG00000119314	PTBP3	-0.434934	0.000551105
ENSG00000121579	NAA50	-0.327515	0.000552723
ENSG00000177189	RPS6KA3	-0.33633	0.000552723
ENSG00000144566	RAB5A	-0.790445	0.000556287
ENSG00000100625	SIX4	-0.613787	0.000556287
ENSG00000168214	RBPJ	-0.477956	0.000557272
ENSG00000165704	HPRT1	-0.632763	0.00055921
ENSG00000176208	ATAD5	-0.580358	0.000564363
ENSG00000116954	RRAGC	-0.396538	0.000572978
ENSG00000011405	PIK3C2A	-0.366135	0.000573226
ENSG00000130707	ASS1	0.8161	0.000587576
ENSG00000142871	CYR61	-0.609993	0.000590361
ENSG00000101670	LIPG	-0.329218	0.000593106
ENSG00000139197	PEX5	0.81757	0.000601958
ENSG00000128595	CALU	-0.405766	0.000608431
ENSG00000168476	REEP4	0.726679	0.000632172
ENSG00000065613	SLK	-0.333069	0.000632172
ENSG00000234975	FTH1P2	0.726914	0.000632172
ENSG00000232187	FTH1P7	0.820152	0.000642008
ENSG00000087266	SH3BP2	1.87791	0.000657352
ENSG00000053747	LAMA3	-0.561046	0.000657873
ENSG00000230204	FTH1P5	0.831559	0.000658217
ENSG00000123575	FAM199X	-0.616493	0.000664216
ENSG00000117475	BLZF1	-0.622493	0.00066592
ENSG00000187123	LYPD6	-1.11142	0.000666297
ENSG00000125630	POLR1B	0.646716	0.000666297
ENSG00000112715	VEGFA	0.437511	0.000683609
ENSG00000157106	SMG1	-0.539406	0.000685439
ENSG00000010818	HIVEP2	-0.690344	0.000685439
ENSG00000075624	ACTB	-0.529317	0.000685951
ENSG00000197170	PSMD12	-0.436518	0.000687755
ENSG00000116584	ARHGEF2	0.503884	0.000690405
ENSG00000112742	TTK	-0.543677	0.000694393
ENSG00000159399	HK2	-0.81545	0.000700293
ENSG00000107863	ARHGAP21	-0.345869	0.000701399
ENSG00000188636	LDOC1L	0.920311	0.000708577
ENSG00000127329	PTPRB	-0.753738	0.000721918
ENSG00000131069	ACSS2	0.339295	0.000733143
ENSG00000159267	HLCS	0.644599	0.000744524
ENSG00000076554	TPD52	-0.672944	0.000748851
ENSG00000126821	SGPP1	-0.714373	0.000748851
ENSG00000131023	LATS1	-0.485208	0.000762214
ENSG00000127603	MACF1	-0.519514	0.00076616
ENSG00000173846	PLK3	1.28974	0.000769309
ENSG00000151893	CACUL1	-0.462614	0.000798118
ENSG00000139687	RB1	-0.418644	0.000799665
ENSG00000255823	MTRNR2L8	0.411722	0.000819501
ENSG00000091317	CMTM6	-0.338359	0.000836135
ENSG00000139921	TMX1	-0.449742	0.000843789
ENSG00000135766	EGLN1	-0.619133	0.00084838
ENSG00000176406	RIMS2	-0.848107	0.000855674
ENSG00000113441	LNPEP	-0.414491	0.000855674
ENSG00000163577	EIF5A2	-0.748255	0.000859598
ENSG00000213362	FTH1P12	0.889364	0.000879096
ENSG00000080371	RAB21	-0.42548	0.00088652
ENSG00000227376	FTH1P16	0.733745	0.000899316
ENSG00000132388	UBE2G1	-0.394071	0.000899316
ENSG00000163157	TMOD4	-2.25715	0.000899316
ENSG00000197586	ENTPD6	0.416751	0.00092206
ENSG00000118503	TNFAIP3	-0.649781	0.000922434
ENSG00000171587	DSCAM	-0.79255	0.000926328
ENSG00000272016	RP11-215G15.5	-0.659009	0.00093024
ENSG00000162613	FUBP1	-0.506215	0.000934591
ENSG00000218336	TENM3	-0.478508	0.000934591
ENSG00000113739	STC2	-0.571584	0.000953798
ENSG00000157557	ETS2	-0.346795	0.000956785
ENSG00000058272	PPP1R12A	-0.470825	0.000966062
ENSG00000151151	IPMK	-0.714673	0.000975695
ENSG00000123143	PKN1	0.620613	0.000975695
ENSG00000140391	TSPAN3	-0.425752	0.000975695
ENSG00000204120	GIGYF2	0.760411	0.000991201
ENSG00000123124	WWP1	-0.400728	0.001001725
ENSG00000100320	RBFOX2	-0.373835	0.001004568
ENSG00000088726	TMEM40	-0.461374	0.001004568
ENSG00000172292	CERS6	-0.33713	0.001004568
ENSG00000104331	IMPAD1	-0.416045	0.001009019
ENSG00000138675	FGF5	-0.823608	0.001025646
ENSG00000127955	GNAI1	-0.431264	0.001042065
ENSG00000091844	RGS17	-0.807161	0.001074873
ENSG00000182224	CYB5D1	-2.42072	0.001094149
ENSG00000141258	SGSM2	0.824044	0.001102376
ENSG00000166747	AP1G1	-0.455647	0.001102376
ENSG00000151414	NEK7	-0.53546	0.001106796
ENSG00000135407	AVIL	-0.819073	0.001106796
ENSG00000029153	ARNTL2	-0.518039	0.001109836
ENSG00000204899	MZT1	-0.66178	0.001109836
ENSG00000188130	MAPK12	0.885634	0.001127188
ENSG00000141252	VPS53	-0.695515	0.001128108
ENSG00000224531	SMIM13	-0.475808	0.001128108
ENSG00000213901	SLC23A3	2.32102	0.001128108
ENSG00000018236	CNTN1	-0.44116	0.001130775
ENSG00000167601	AXL	-0.545783	0.001149398
ENSG00000261654	RP11-96K19.4	-1.29768	0.001151562
ENSG00000197601	FAR1	-0.549807	0.001172624
ENSG00000186230	ZNF749	0.920743	0.001174824
ENSG00000134987	WDR36	-0.382307	0.001178965
ENSG00000137942	FNBP1L	-0.516712	0.001186019
ENSG00000116747	TROVE2	-0.496972	0.001200082
ENSG00000011426	ANLN	-0.422378	0.001227615
ENSG00000141696	LEPREL4	0.88573	0.001238937
ENSG00000130147	SH3BP4	-0.509016	0.001266575
ENSG00000066279	ASPM	-0.373858	0.00127216
ENSG00000173451	THAP2	-0.7018	0.001281249
ENSG00000103852	TTC23	-0.98599	0.001281249
ENSG00000213453	FTH1P3	0.830704	0.001294965
ENSG00000166822	TMEM170A	-0.506629	0.001306055
ENSG00000102218	RP2	-0.570413	0.001315252
ENSG00000159216	RUNX1	-0.858177	0.001321473
ENSG00000140443	IGF1R	-0.424219	0.001385583
ENSG00000015171	ZMYND11	0.861148	0.001387194
ENSG00000130513	GDF15	1.23129	0.001428833
ENSG00000150938	CRIM1	-0.38184	0.001428833
ENSG00000066422	ZBTB11	-0.408243	0.001449383
ENSG00000115902	SLC1A4	0.395354	0.001509707
ENSG00000138411	HECW2	-1.90995	0.001524398
ENSG00000105849	TWISTNB	-0.484778	0.001557422
ENSG00000112414	GPR126	-0.317686	0.001567159
ENSG00000139211	AMIGO2	-1.10755	0.001567159
ENSG00000132549	VPS13B	-0.456127	0.001567252
ENSG00000089356	FXYD3	0.572842	0.001567252
ENSG00000162368	CMPK1	-0.44304	0.0015679
ENSG00000166130	IKBIP	-0.642835	0.001584502
ENSG00000197969	VPS13A	-0.515878	0.001587641
ENSG00000197930	ERO1L	-0.488736	0.001603281
ENSG00000128309	MPST	0.706007	0.00160724
ENSG00000086758	HUWE1	-0.432273	0.001625329
ENSG00000010244	ZNF207	-0.329585	0.001625329
ENSG00000139505	MTMR6	-0.496958	0.001625329
ENSG00000130702	LAMA5	0.551148	0.001625329
ENSG00000004142	POLDIP2	0.412645	0.001654752
ENSG00000006831	ADIPOR2	-0.29031	0.001654752
ENSG00000024526	DEPDC1	-0.659407	0.001656237
ENSG00000263142	LRRC37A17P	1.6497	0.001669256
ENSG00000134852	CLOCK	-0.393106	0.001669256
ENSG00000260465	RP11-63M22.2	-1.59271	0.001670836
ENSG00000100311	PDGFB	0.974481	0.001686733
ENSG00000166825	ANPEP	-0.64088	0.001709009
ENSG00000135932	CAB39	-0.547815	0.001710033
ENSG00000173706	HEG1	-0.451293	0.001724528
ENSG00000157873	TNFRSF14	1.50104	0.00174741
ENSG00000091527	CDV3	1.12071	0.001777671
ENSG00000111371	SLC38A1	-0.300862	0.001785367
ENSG00000213066	FGFR1OP	-0.640936	0.00179381
ENSG00000178996	SNX18	-0.461147	0.001823679
ENSG00000145901	TNIP1	-0.537015	0.001825308
ENSG00000180543	TSPYL5	0.644915	0.001870105
ENSG00000102158	MAGT1	-0.393309	0.001890202
ENSG00000188725	SMIM15	-0.449094	0.001897622
ENSG00000087086	FTL	0.558171	0.001907707
ENSG00000178038	ALS2CL	1.07958	0.001920626
ENSG00000148153	INIP	-0.534522	0.001925699
ENSG00000070444	MNT	1.23093	0.00192577
ENSG00000020256	ZFP64	0.498689	0.00193523
ENSG00000196878	LAMB3	-0.283116	0.00193523
ENSG00000133030	MPRIP	-0.348754	0.001938219
ENSG00000166803	KIAA0101	-0.677357	0.001967152
ENSG00000213462	ERV3-1	2.04851	0.001971077
ENSG00000147689	FAM83A	-0.926798	0.001976418
ENSG00000173611	SCAI	-0.655483	0.00197885
ENSG00000170325	PRDM10	-0.607107	0.001982448
ENSG00000165813	C10orf118	-0.485264	0.002050031
ENSG00000139746	RBM26	-0.414812	0.002050031
ENSG00000105835	NAMPT	-0.448238	0.002066535
ENSG00000197279	ZNF165	0.339027	0.002068034
ENSG00000117868	ESYT2	-0.367123	0.002080035
ENSG00000138698	RAP1GDS1	-0.42376	0.002080035
ENSG00000124788	ATXN1	-0.394787	0.002080035
ENSG00000082269	FAM135A	-0.397721	0.002085983
ENSG00000125249	RAP2A	-0.439075	0.002091324
ENSG00000145817	YIPF5	-0.442657	0.002091707
ENSG00000106080	FKBP14	-0.513557	0.00210898
ENSG00000117308	GALE	0.866969	0.002115958
ENSG00000058091	CDK14	-0.498018	0.002117686
ENSG00000254893	RP11-466P24.2	-0.470934	0.002120896
ENSG00000105698	USF2	0.677045	0.002151167
ENSG00000139517	LNX2	-0.506415	0.002152612
ENSG00000107731	UNC5B	0.960522	0.002165237
ENSG00000079950	STX7	-0.445933	0.002209313
ENSG00000079819	EPB41L2	-0.49957	0.002211889
ENSG00000128791	TWSG1	-0.639454	0.002216423
ENSG00000175906	ARL4D	0.542345	0.002227616
ENSG00000148346	LCN2	0.910827	0.002230799
ENSG00000115310	RTN4	-0.29708	0.002230799
ENSG00000025293	PHF20	-0.282086	0.002231418
ENSG00000112406	HECA	-0.392789	0.002231418
ENSG00000070950	RAD18	-0.458863	0.002233317
ENSG00000187134	AKR1C1	1.01886	0.00223369
ENSG00000118276	B4GALT6	-0.726862	0.002363687
ENSG00000211459	MT-RNR1	0.40342	0.002379972
ENSG00000100994	PYGB	0.293664	0.002399129
ENSG00000169429	IL8	-1.39744	0.002416525
ENSG00000136240	KDELR2	-0.390787	0.002434409
ENSG00000176624	MEX3C	-0.33837	0.002436603
ENSG00000180370	PAK2	-0.346571	0.002465934
ENSG00000196159	FAT4	-1.02902	0.002514149
ENSG00000139324	TMTC3	-0.365379	0.002514149
ENSG00000138771	SHROOM3	-0.559365	0.0025336
ENSG00000176092	AIM1L	0.62868	0.002541305
ENSG00000077458	FAM76B	-0.665724	0.002603486
ENSG00000113161	HMGCR	-0.352968	0.002622933
ENSG00000115464	USP34	-0.412502	0.002627789
ENSG00000047634	SCML1	-0.563146	0.002632854
ENSG00000065559	MAP2K4	-0.443865	0.002636321
ENSG00000082701	GSK3B	-0.354335	0.002642901
ENSG00000167114	SLC27A4	0.700795	0.002642901
ENSG00000090565	RAB11FIP3	0.804657	0.002655821
ENSG00000196792	STRN3	-0.367696	0.002659113
ENSG00000103811	CTSH	0.611112	0.002659113
ENSG00000113356	POLR3G	-0.655902	0.002659113
ENSG00000188112	C6orf132	0.631134	0.002683858
ENSG00000139354	GAS2L3	-0.824851	0.002693373
ENSG00000088448	ANKRD10	-0.64499	0.002693373
ENSG00000156535	CD109	-0.317282	0.002693373
ENSG00000141429	GALNT1	-0.477701	0.002693373
ENSG00000113140	SPARC	-0.403485	0.002743169
ENSG00000164080	RAD54L2	-1.08365	0.002748163
ENSG00000151276	MAGI1	-0.784374	0.002824009
ENSG00000102858	MGRN1	0.882016	0.00288672
ENSG00000186298	PPP1CC	-0.441723	0.002917718
ENSG00000073921	PICALM	-0.422969	0.002935562
ENSG00000185585	OLFML2A	0.593811	0.003038688
ENSG00000177200	CHD9	-0.380469	0.003116157
ENSG00000066923	STAG3	0.493679	0.003116157
ENSG00000240356	RPL23AP7	-0.942036	0.003117149
ENSG00000165443	PHYHIPL	-0.57846	0.003151812
ENSG00000175879	HOXD8	0.691384	0.003219
ENSG00000273038	RP11-479G22.8	-0.951511	0.00323535
ENSG00000033178	UBA6	-0.440511	0.003235403
ENSG00000183741	CBX6	0.636885	0.003238096
ENSG00000031698	SARS	0.35101	0.00325828
ENSG00000116191	RALGPS2	-0.510921	0.00325828
ENSG00000104549	SQLE	0.303953	0.00325828
ENSG00000164032	H2AFZ	0.684754	0.003283656
ENSG00000161326	DUSP14	-0.382266	0.003283656
ENSG00000237939	AC097523.3	-1.10523	0.003336725
ENSG00000113638	TTC33	-0.880233	0.003336725
ENSG00000151388	ADAMTS12	-0.960328	0.003342404
ENSG00000104067	TJP1	-0.425156	0.00335107
ENSG00000154096	THY1	-0.450369	0.00335107
ENSG00000124143	ARHGAP40	0.870757	0.00335107
ENSG00000133121	STARD13	-0.560353	0.003371486
ENSG00000138796	HADH	0.616057	0.003373832
ENSG00000091622	PITPNM3	0.564203	0.003374581
ENSG00000105357	MYH14	1.10802	0.003413224
ENSG00000144320	KIAA1715	-0.478423	0.003413224
ENSG00000137648	TMPRSS4	0.839119	0.003446779
ENSG00000075391	RASAL2	-0.996472	0.00346364
ENSG00000171488	LRRC8C	-0.53586	0.0034722
ENSG00000119326	CTNNAL1	-0.368029	0.003480885
ENSG00000197535	MYO5A	-0.301465	0.003480885
ENSG00000196700	ZNF512B	0.543835	0.003481815
ENSG00000109971	HSPA8	0.74106	0.003485131
ENSG00000174032	SLC25A30	-0.562768	0.003546771
ENSG00000181523	SGSH	1.91647	0.003548662
ENSG00000091009	RBM27	-0.33298	0.003548662
ENSG00000238266	LINC00707	-1.01445	0.003589264
ENSG00000184384	MAML2	-0.738278	0.003629051
ENSG00000164086	DUSP7	0.381207	0.003629051
ENSG00000198683	AC012615.1	-6.2389	0.003726159
ENSG00000067048	DDX3Y	-0.335022	0.003726159
ENSG00000122565	CBX3	-0.375132	0.003726504
ENSG00000119396	RAB14	-0.341978	0.003740782
ENSG00000157214	STEAP2	1.17375	0.00375507
ENSG00000155097	ATP6V1C1	-0.282023	0.003764681
ENSG00000165689	SDCCAG3	0.53317	0.003768785
ENSG00000133401	PDZD2	-0.788134	0.003781735
ENSG00000114416	FXR1	-0.394246	0.003781735
ENSG00000111885	MAN1A1	-0.476109	0.003799411
ENSG00000164111	ANXA5	-0.304306	0.003819767
ENSG00000117505	DR1	-0.479255	0.003828915
ENSG00000146676	PURB	-0.340396	0.003830027
ENSG00000177425	PAWR	-0.367105	0.003830027
ENSG00000083896	YTHDC1	-0.620076	0.003876446
ENSG00000073756	PTGS2	-0.872861	0.003906023
ENSG00000163960	UBXN7	-0.378576	0.003923711
ENSG00000213390	ARHGAP19	-0.477731	0.003971214
ENSG00000165672	PRDX3	-0.394239	0.003971214
ENSG00000137393	RNF144B	-0.605862	0.003989664
ENSG00000137821	LRRC49	-0.603339	0.004025809
ENSG00000174405	LIG4	-0.433477	0.004051587
ENSG00000213672	NCKIPSD	0.676699	0.004055796
ENSG00000213240	NOTCH2NL	-0.607924	0.004061465
ENSG00000196586	MYO6	-0.461335	0.004062754
ENSG00000131732	ZCCHC9	-0.56419	0.004091576
ENSG00000104419	NDRG1	-0.813154	0.004100484
ENSG00000101384	JAG1	-0.315601	0.004100484
ENSG00000120709	FAM53C	-0.373498	0.004101595
ENSG00000009950	MLXIPL	1.53582	0.004105364
ENSG00000130479	MAP1S	-0.806285	0.004106279
ENSG00000230937	MIR205HG	0.690064	0.004117992
ENSG00000008952	SEC62	-0.420393	0.004147311
ENSG00000137812	CASC5	-0.375803	0.004152927
ENSG00000184939	ZFP90	0.74203	0.004162454
ENSG00000105514	RAB3D	0.463487	0.004228724
ENSG00000113068	PFDN1	-0.904468	0.004237222
ENSG00000156521	TYSND1	0.64436	0.004264881
ENSG00000070047	PHRF1	0.847352	0.004298178
ENSG00000068724	TTC7A	0.756862	0.004300058
ENSG00000143702	CEP170	-0.84401	0.004307525
ENSG00000091164	TXNL1	-0.491352	0.004307525
ENSG00000144959	NCEH1	-0.378121	0.004307525
ENSG00000165891	E2F7	-0.439277	0.00435601
ENSG00000198900	TOP1	-0.286515	0.004401627
ENSG00000163159	VPS72	-0.557012	0.004401627
ENSG00000214194	LINC00998	-0.633022	0.004429888
ENSG00000090530	LEPREL1	-0.507585	0.004444334
ENSG00000164251	F2RL1	-0.546836	0.004444334
ENSG00000188206	HNRNPU-AS1	-0.736454	0.004445794
ENSG00000135655	USP15	-0.442155	0.004448873
ENSG00000096063	SRPK1	-0.372591	0.004487271
ENSG00000100350	FOXRED2	0.654486	0.004487271
ENSG00000165322	ARHGAP12	-0.483551	0.00450595
ENSG00000118960	HS1BP3	0.617543	0.00450595
ENSG00000124767	GLO1	-0.346041	0.004563923
ENSG00000118193	KIF14	-0.449734	0.004564198
ENSG00000164506	STXBP5	-0.453912	0.004564198
ENSG00000112182	BACH2	-0.493583	0.004564508
ENSG00000062725	APPBP2	-0.559404	0.004583752
ENSG00000141682	PMAIP1	-1.3066	0.004600055
ENSG00000148158	SNX30	-0.350507	0.004614566
ENSG00000143373	ZNF687	0.575046	0.004619401
ENSG00000113448	PDE4D	-0.750473	0.004649169
ENSG00000170876	TMEM43	0.357737	0.004683163
ENSG00000135476	ESPL1	0.498699	0.004683163
ENSG00000108960	MMD	-0.575885	0.004683163
ENSG00000125817	CENPB	0.40622	0.004734088
ENSG00000120526	NUDCD1	-0.445272	0.004759908
ENSG00000077232	DNAJC10	-0.370603	0.0047625
ENSG00000083223	ZCCHC6	-0.434688	0.00479914
ENSG00000084093	REST	-0.43714	0.004849998
ENSG00000153214	TMEM87B	-0.45692	0.004885507
ENSG00000164796	CSMD3	-1.16436	0.004925405
ENSG00000145685	LHFPL2	0.504302	0.004960626
ENSG00000112249	ASCC3	-0.268842	0.004960626
ENSG00000188419	CHM	-0.441214	0.004989808
ENSG00000152503	TRIM36	-0.628192	0.004993923
ENSG00000181472	ZBTB2	-0.450888	0.005000353
ENSG00000163435	ELF3	0.699138	0.005106304
ENSG00000151967	SCHIP1	-1.01755	0.005117403
ENSG00000117724	CENPF	-0.304331	0.00517647
ENSG00000163902	RPN1	-0.250957	0.005220522
ENSG00000063438	AHRR	1.76659	0.005220522
ENSG00000198689	SLC9A6	-0.491624	0.005232454
ENSG00000143393	PI4KB	0.488149	0.005240475
ENSG00000109332	UBE2D3	-0.371696	0.005276766
ENSG00000261609	GAN	-0.454811	0.005325363
ENSG00000141385	AFG3L2	0.4974	0.005410502
ENSG00000130517	PGPEP1	0.632086	0.005486801
ENSG00000108395	TRIM37	-0.317656	0.00552634
ENSG00000187164	KIAA1598	-0.40669	0.005549179
ENSG00000134758	RNF138	-1.12655	0.005565236
ENSG00000023287	RB1CC1	-0.287075	0.005585335
ENSG00000124795	DEK	-0.504831	0.005607458
ENSG00000139718	SETD1B	0.791007	0.005666458
ENSG00000174106	LEMD3	-0.39291	0.005693534
ENSG00000123612	ACVR1C	-1.10909	0.005695945
ENSG00000124486	USP9X	-0.280865	0.005695945
ENSG00000160584	SIK3	-0.547812	0.005718665
ENSG00000084112	SSH1	-0.455294	0.005761901
ENSG00000215256	DHRS4-AS1	0.674617	0.005761901
ENSG00000203817	FAM72C	-0.448903	0.005795803
ENSG00000259758	CASC7	-0.42368	0.005795803
ENSG00000117394	SLC2A1	-0.393694	0.0058042
ENSG00000258186	SLC7A5P2	4.82002	0.005815063
ENSG00000110031	LPXN	-0.866031	0.005815063
ENSG00000163535	SGOL2	-0.542972	0.005815063
ENSG00000005339	CREBBP	-0.256094	0.005821723
ENSG00000232677	LINC00665	0.513796	0.005960988
ENSG00000133812	SBF2	-0.523633	0.005985582
ENSG00000179837	RBM15B	0.637091	0.006008477
ENSG00000115966	ATF2	-0.450384	0.006044981
ENSG00000196428	TSC22D2	-0.437468	0.006094422
ENSG00000106617	PRKAG2	-0.446747	0.006173057
ENSG00000164889	SLC4A2	0.415297	0.006175028
ENSG00000156011	PSD3	-0.422456	0.006186577
ENSG00000085719	CPNE3	-0.379626	0.006199823
ENSG00000242265	PEG10	-0.407299	0.00621993
ENSG00000006451	RALA	-0.361887	0.006272109
ENSG00000136870	ZNF189	0.683678	0.006281565
ENSG00000153827	TRIP12	-0.225236	0.006283724
ENSG00000265415	CTD-2510F5.4	-0.581839	0.00630611
ENSG00000119392	GLE1	0.389105	0.00630611
ENSG00000068976	PYGM	-0.771977	0.00630611
ENSG00000113658	SMAD5	-0.454094	0.00630611
ENSG00000154380	ENAH	-0.504054	0.006313109
ENSG00000105141	CASP14	0.830908	0.006377305
ENSG00000225383	SFTA1P	-0.542403	0.006377305
ENSG00000100985	MMP9	-0.819463	0.006384501
ENSG00000137801	THBS1	-0.404083	0.006445398
ENSG00000110400	PVRL1	0.313066	0.006445398
ENSG00000139278	GLIPR1	-0.59643	0.006470551
ENSG00000141646	SMAD4	-0.682603	0.00653451
ENSG00000145431	PDGFC	-0.513308	0.006625912
ENSG00000072201	LNX1	-0.797847	0.006648524
ENSG00000087095	NLK	-0.870689	0.006664847
ENSG00000242960	FTH1P23	0.824911	0.006665972
ENSG00000132424	PNISR	-0.367326	0.006665972
ENSG00000144048	DUSP11	-0.486489	0.006696198
ENSG00000138660	AP1AR	-0.461933	0.006710171
ENSG00000085449	WDFY1	-0.399849	0.006786616
ENSG00000123975	CKS2	-0.368694	0.00680062
ENSG00000152818	UTRN	-0.415004	0.0068191
ENSG00000227372	TP73-AS1	1.38135	0.006830661
ENSG00000169032	MAP2K1	-0.453037	0.006871813
ENSG00000152242	C18orf25	-0.453717	0.006926356
ENSG00000168283	BMI1	-0.615763	0.006926514
ENSG00000125945	ZNF436	0.480608	0.006980002
ENSG00000242992	FTH1P4	0.694209	0.006997037
ENSG00000183723	CMTM4	0.912103	0.006997037
ENSG00000210164	MT-TG	-1.08233	0.007083441
ENSG00000111859	NEDD9	-0.700549	0.007083441
ENSG00000111237	VPS29	-0.507769	0.007167504
ENSG00000186350	RXRA	0.409503	0.007230428
ENSG00000105968	H2AFV	-0.328072	0.007303991
ENSG00000112081	SRSF3	-0.617066	0.007339002
ENSG00000110880	CORO1C	-0.379831	0.007437291
ENSG00000171877	FRMD5	-0.673775	0.007507716
ENSG00000259796	RP11-355I22.7	-1.40433	0.007528497
ENSG00000218980	FTH1P15	0.875994	0.00753224
ENSG00000109436	TBC1D9	-0.450277	0.007539817
ENSG00000157657	ZNF618	0.661461	0.00759879
ENSG00000260032	LINC00657	-0.302922	0.007622791
ENSG00000105825	TFPI2	-1.18146	0.007622791
ENSG00000172216	CEBPB	0.336723	0.007705413
ENSG00000173786	CNP	0.697577	0.00773645
ENSG00000110090	CPT1A	0.381413	0.007757173
ENSG00000117906	RCN2	-0.460413	0.007773902
ENSG00000134574	DDB2	0.4943	0.007777619
ENSG00000173442	EHBP1L1	0.491963	0.007788501
ENSG00000164172	MOCS2	0.746658	0.007794526
ENSG00000101210	EEF1A2	0.894069	0.007890073
ENSG00000138641	HERC3	-0.497338	0.007953062
ENSG00000133703	KRAS	-0.376831	0.007963037
ENSG00000187098	MITF	-0.9472	0.008086292
ENSG00000167522	ANKRD11	-0.369371	0.008086292
ENSG00000181274	FRAT2	1.25647	0.008089231
ENSG00000213281	NRAS	-0.398524	0.00809207
ENSG00000204138	PHACTR4	-0.304437	0.008127227
ENSG00000114978	MOB1A	-0.396568	0.008151149
ENSG00000142867	BCL10	-0.404367	0.008188376
ENSG00000147174	ACRC	-0.847149	0.00819793
ENSG00000140265	ZSCAN29	0.430308	0.008260724
ENSG00000133961	NUMB	-0.304681	0.008260724
ENSG00000196365	LONP1	0.332523	0.008313179
ENSG00000115514	TXNDC9	-0.516713	0.008323964
ENSG00000136155	SCEL	-0.434965	0.008345839
ENSG00000138271	GPR87	-0.492584	0.008380247
ENSG00000125901	MRPS26	0.683196	0.008380247
ENSG00000173674	EIF1AX	-0.40073	0.008380247
ENSG00000172939	OXSR1	-0.417553	0.008407815
ENSG00000164823	OSGIN2	-0.316674	0.008417864
ENSG00000182718	ANXA2	-0.586639	0.008418099
ENSG00000135486	HNRNPA1	-0.333339	0.008434907
ENSG00000131931	THAP1	-0.756316	0.008434907
ENSG00000139926	FRMD6	-0.706128	0.008473047
ENSG00000205730	ITPRIPL2	0.650391	0.008539119
ENSG00000078081	LAMP3	1.10555	0.008609642
ENSG00000119638	NEK9	0.411866	0.008609649
ENSG00000142039	CCDC97	0.79953	0.008609649
ENSG00000124201	ZNFX1	0.351175	0.008609649
ENSG00000243444	PALM2	1.50119	0.00861112
ENSG00000185658	BRWD1	-0.673086	0.008754514
ENSG00000001167	NFYA	0.610006	0.008820387
ENSG00000141574	SECTM1	1.02274	0.00885425
ENSG00000119950	MXI1	-0.660094	0.008949791
ENSG00000114480	GBE1	-0.592282	0.008949791
ENSG00000183696	UPP1	0.256797	0.008949791
ENSG00000187231	SESTD1	-0.447788	0.008949791
ENSG00000101109	STK4	-0.505092	0.008949791
ENSG00000173334	TRIB1	0.337291	0.008949791
ENSG00000106278	PTPRZ1	-0.738882	0.009085018
ENSG00000114853	ZBTB47	1.41569	0.009282869
ENSG00000198089	SFI1	0.700839	0.009348268
ENSG00000124209	RAB22A	-0.317625	0.009354696
ENSG00000114354	TFG	-0.407771	0.009437212
ENSG00000153391	INO80C	-0.442388	0.009453819
ENSG00000139116	KIF21A	-0.337889	0.009474724
ENSG00000210082	MT-RNR2	0.363495	0.009612102
ENSG00000068078	FGFR3	0.625939	0.00963684
ENSG00000104312	RIPK2	-0.541597	0.00963684
ENSG00000197275	RAD54B	-0.673484	0.00963684
ENSG00000104447	TRPS1	-0.514027	0.009655595
ENSG00000119318	RAD23B	-0.327164	0.009660758
ENSG00000084636	COL16A1	0.361221	0.009714998
ENSG00000122641	INHBA	-0.796023	0.009734239
ENSG00000206075	SERPINB5	-0.258033	0.009754708
ENSG00000196155	PLEKHG4	1.0453	0.009775698
ENSG00000169902	TPST1	-0.459926	0.009824539
ENSG00000171163	ZNF692	0.779517	0.009824539
ENSG00000165494	PCF11	-0.556549	0.009824904
ENSG00000253729	PRKDC	-0.350588	0.00986113
ENSG00000138180	CEP55	-0.395064	0.009914594
ENSG00000152601	MBNL1	-0.716055	0.009914594
ENSG00000081277	PKP1	0.324619	0.009948912
ENSG00000181885	CLDN7	0.709007	0.009972755
ENSG00000116791	CRYZ	-0.576832	0.010151027
ENSG00000112290	WASF1	-0.49073	0.010283723
ENSG00000133477	FAM83F	0.743178	0.010320556
ENSG00000070214	SLC44A1	-0.614244	0.010360113
ENSG00000079335	CDC14A	-0.893185	0.010372956
ENSG00000135446	CDK4	0.425392	0.010413823
ENSG00000124226	RNF114	-0.447707	0.010432251
ENSG00000215784	FAM72D	-0.33325	0.01049531
ENSG00000115525	ST3GAL5	-1.02239	0.010503504
ENSG00000138018	EPT1	-0.334153	0.010606552
ENSG00000152518	ZFP36L2	0.345874	0.010606552
ENSG00000164830	OXR1	-0.349396	0.010606552
ENSG00000171219	CDC42BPG	0.610415	0.010657953
ENSG00000086544	ITPKC	0.522935	0.010777114
ENSG00000185305	ARL15	-0.630021	0.010777114
ENSG00000151632	AKR1C2	1.0648	0.010777114
ENSG00000135250	SRPK2	-0.365451	0.010836649
ENSG00000136867	SLC31A2	-0.926112	0.010884413
ENSG00000136754	ABI1	-0.660883	0.010903372
ENSG00000103351	CLUAP1	0.772394	0.010995081
ENSG00000187017	ESPN	1.1458	0.011021637
ENSG00000149187	CELF1	-0.235857	0.011023095
ENSG00000068366	ACSL4	-0.470031	0.011070218
ENSG00000107829	FBXW4	0.782522	0.011153518
ENSG00000128159	TUBGCP6	0.801864	0.011153518
ENSG00000114127	XRN1	-0.437553	0.011153518
ENSG00000123219	CENPK	-0.485177	0.011190349
ENSG00000251493	FOXD1	-0.468524	0.011190349
ENSG00000138160	KIF11	-0.424603	0.011243232
ENSG00000247626	MARS2	1.23357	0.011243232
ENSG00000117153	KLHL12	0.384515	0.011254134
ENSG00000005889	ZFX	-0.354197	0.011284082
ENSG00000067798	NAV3	-0.867423	0.011354127
ENSG00000005812	FBXL3	-0.431486	0.011361295
ENSG00000136999	NOV	1.59919	0.01139537
ENSG00000034510	TMSB10	-0.332822	0.011505271
ENSG00000176225	RTTN	-0.456583	0.011676587
ENSG00000140465	CYP1A1	1.8621	0.011750485
ENSG00000156504	FAM122B	-0.648121	0.011794436
ENSG00000145623	OSMR	-0.447712	0.012019129
ENSG00000187498	COL4A1	-0.371175	0.012022022
ENSG00000141579	ZNF750	1.66959	0.012022022
ENSG00000158290	CUL4B	-0.372693	0.012022022
ENSG00000163624	CDS1	-0.327246	0.012033055
ENSG00000092820	EZR	-0.274149	0.012063539
ENSG00000196950	SLC39A10	-0.978999	0.012105399
ENSG00000223960	AC009948.5	-1.11126	0.012167439
ENSG00000135318	NT5E	-0.506323	0.012170391
ENSG00000004660	CAMKK1	1.24457	0.012170391
ENSG00000163629	PTPN13	-0.372015	0.012170391
ENSG00000169991	IFFO2	-0.323939	0.012170391
ENSG00000096696	DSP	-0.217571	0.012170391
ENSG00000134955	SLC37A2	0.885417	0.012170391
ENSG00000038219	BOD1L1	-0.283066	0.012232353
ENSG00000102878	HSF4	1.6451	0.0122485
ENSG00000143303	RRNAD1	0.729192	0.0122485
ENSG00000166147	FBN1	-1.7066	0.0122485
ENSG00000151239	TWF1	-0.416677	0.0122485
ENSG00000248383	PCDHAC1	1.16934	0.0122485
ENSG00000114573	ATP6V1A	-0.342989	0.0122485
ENSG00000113407	TARS	-0.325528	0.012252815
ENSG00000196504	PRPF40A	-0.255989	0.0123903
ENSG00000100842	EFS	0.862367	0.012557216
ENSG00000257671	RP3-416H24.1	1.40641	0.012693962
ENSG00000198363	ASPH	-0.324368	0.012799511
ENSG00000136824	SMC2	-0.336432	0.012867558
ENSG00000187240	DYNC2H1	-0.376442	0.012867558
ENSG00000107819	SFXN3	0.369863	0.012867558
ENSG00000204634	TBC1D8	0.464738	0.012940588
ENSG00000109101	FOXN1	1.49253	0.012956908
ENSG00000113387	SUB1	-0.321003	0.012977322
ENSG00000163376	KBTBD8	-1.3011	0.012977322
ENSG00000125868	DSTN	-0.945575	0.013030489
ENSG00000005955	GGNBP2	-0.290829	0.013196298
ENSG00000263203	CHTF8	0.528875	0.013206358
ENSG00000009413	REV3L	-0.349123	0.013238459
ENSG00000144504	ANKMY1	1.23748	0.013238459
ENSG00000184156	KCNQ3	-1.37434	0.013294129
ENSG00000047410	TPR	-0.284335	0.013306493
ENSG00000104626	ERI1	-0.559095	0.013363419
ENSG00000104219	ZDHHC2	-0.548212	0.013460433
ENSG00000152795	HNRNPDL	-0.480017	0.013460433
ENSG00000094916	CBX5	-0.260826	0.013540503
ENSG00000104343	UBE2W	-1.12303	0.013540503
ENSG00000140563	MCTP2	-0.568893	0.013550964
ENSG00000177888	ZBTB41	-0.528402	0.01360729
ENSG00000076053	RBM7	-0.509673	0.013791902
ENSG00000186174	BCL9L	0.30577	0.013944022
ENSG00000107679	PLEKHA1	-0.846343	0.014145723
ENSG00000151693	ASAP2	-0.398267	0.014166841
ENSG00000136758	YME1L1	-0.289204	0.014187693
ENSG00000269028	MTRNR2L12	0.32926	0.014187693
ENSG00000162642	C1orf52	-0.563569	0.014187693
ENSG00000184675	AMER1	1.14562	0.014335073
ENSG00000198142	SOWAHC	-0.40013	0.014335073
ENSG00000107372	ZFAND5	-0.289839	0.014423052
ENSG00000101333	PLCB4	-0.425278	0.014423052
ENSG00000028839	TBPL1	-0.521223	0.014445204
ENSG00000126432	PRDX5	0.297354	0.014450207
ENSG00000058729	RIOK2	-0.489394	0.014474603
ENSG00000138757	G3BP2	-0.335114	0.014566325
ENSG00000157764	BRAF	-0.321228	0.014600836
ENSG00000171617	ENC1	-0.625706	0.014612551
ENSG00000161249	DMKN	0.326033	0.014668212
ENSG00000143816	WNT9A	0.858048	0.014709287
ENSG00000143845	ETNK2	0.611272	0.014724799
ENSG00000011566	MAP4K3	-0.420357	0.014724799
ENSG00000112893	MAN2A1	-0.378193	0.014737313
ENSG00000154305	MIA3	-0.430489	0.014772495
ENSG00000138814	PPP3CA	-0.505486	0.014845798
ENSG00000155903	RASA2	-0.601884	0.014861375
ENSG00000164695	CHMP4C	-0.376921	0.014884574
ENSG00000165097	KDM1B	-0.436366	0.015133908
ENSG00000173020	ADRBK1	0.470864	0.015173134
ENSG00000104388	RAB2A	-0.356892	0.015176983
ENSG00000161013	MGAT4B	0.4823	0.015176983
ENSG00000105750	ZNF85	0.891607	0.015176983
ENSG00000136720	HS6ST1	0.73134	0.015207906
ENSG00000144724	PTPRG	-0.513908	0.015248204
ENSG00000186847	KRT14	-0.602742	0.015281798
ENSG00000139973	SYT16	-1.04561	0.015284809
ENSG00000155744	FAM126B	-0.459321	0.0156873
ENSG00000133597	ADCK2	0.642841	0.015755469
ENSG00000137331	IER3	0.341282	0.015756468
ENSG00000162769	FLVCR1	-0.451608	0.01579027
ENSG00000104413	ESRP1	0.343813	0.01579027
ENSG00000162852	CNST	-0.371368	0.01592486
ENSG00000008405	CRY1	-0.688731	0.016008416
ENSG00000006704	GTF2IRD1	0.383643	0.016174521
ENSG00000267279	RP11-879F14.2	-0.966166	0.016332001
ENSG00000138386	NAB1	-0.704755	0.016335253
ENSG00000081014	AP4E1	-0.696667	0.016413259
ENSG00000072954	TMEM38A	0.535331	0.016539868
ENSG00000181104	F2R	-0.344416	0.016571968
ENSG00000108064	TFAM	-0.384303	0.016571968
ENSG00000168040	FADD	0.702351	0.016595418
ENSG00000091409	ITGA6	-0.452143	0.01671018
ENSG00000138778	CENPE	-0.376713	0.01671018
ENSG00000118816	CCNI	-0.398008	0.016781343
ENSG00000126787	DLGAP5	-0.318241	0.016784652
ENSG00000170802	FOXN2	-0.545381	0.016784652
ENSG00000052723	SIKE1	-0.378356	0.016807796
ENSG00000205336	GPR56	0.485282	0.01690666
ENSG00000127526	SLC35E1	-0.550136	0.016947145
ENSG00000166033	HTRA1	0.582973	0.017010902
ENSG00000172006	ZNF554	0.915446	0.017016704
ENSG00000171298	GAA	0.967092	0.01705875
ENSG00000120942	UBIAD1	0.604084	0.017059612
ENSG00000060749	QSER1	-0.387025	0.017132733
ENSG00000072110	ACTN1	-0.339418	0.017285864
ENSG00000054793	ATP9A	0.692477	0.01741556
ENSG00000126903	SLC10A3	0.539214	0.017455167
ENSG00000128191	DGCR8	0.500972	0.017455167
ENSG00000107862	GBF1	-0.28184	0.017501273
ENSG00000062650	WAPAL	-0.274184	0.017501273
ENSG00000106479	ZNF862	0.824757	0.017585076
ENSG00000165152	TMEM246	0.590908	0.017613293
ENSG00000106948	AKNA	0.84566	0.017637926
ENSG00000204217	BMPR2	-0.32401	0.017670107
ENSG00000198455	ZXDB	-0.469219	0.017702761
ENSG00000128591	FLNC	-0.3185	0.017770161
ENSG00000213853	EMP2	0.256487	0.017774407
ENSG00000187244	BCAM	0.274602	0.017774407
ENSG00000130589	HELZ2	0.573999	0.017810609
ENSG00000120162	MOB3B	-0.488164	0.017840432
ENSG00000108219	TSPAN14	-0.926936	0.017871983
ENSG00000110274	CEP164	0.571867	0.017871983
ENSG00000049759	NEDD4L	-0.582219	0.01802621
ENSG00000175166	PSMD2	-0.452408	0.018030905
ENSG00000172071	EIF2AK3	-0.440407	0.018046273
ENSG00000161638	ITGA5	-0.578273	0.018080455
ENSG00000111897	SERINC1	-0.296601	0.018080455
ENSG00000132432	SEC61G	-0.35968	0.018094352
ENSG00000160200	CBS	0.607101	0.018158316
ENSG00000110628	SLC22A18	1.04534	0.018224507
ENSG00000173273	TNKS	-0.280874	0.018224507
ENSG00000127947	PTPN12	-0.229863	0.018224507
ENSG00000169967	MAP3K2	-0.315722	0.018292889
ENSG00000115548	KDM3A	-0.488541	0.018420637
ENSG00000132031	MATN3	-0.669359	0.018420637
ENSG00000210140	MT-TC	0.405964	0.01846374
ENSG00000228998	RP11-697E2.7	-0.6101	0.018497568
ENSG00000148824	MTG1	0.683576	0.018501268
ENSG00000104375	STK3	-0.720877	0.018587883
ENSG00000166888	STAT6	0.390783	0.018590284
ENSG00000108828	VAT1	0.383713	0.01864627
ENSG00000142178	SIK1	0.481065	0.018671996
ENSG00000100596	SPTLC2	-0.340971	0.018709929
ENSG00000183255	PTTG1IP	-0.247656	0.018751405
ENSG00000108821	COL1A1	0.574797	0.018754249
ENSG00000168556	ING2	-0.609619	0.018799307
ENSG00000074855	ANO8	0.530357	0.018804404
ENSG00000113758	DBN1	0.580111	0.018855533
ENSG00000140450	ARRDC4	-0.643074	0.018875934
ENSG00000077147	TM9SF3	-0.330169	0.018886321
ENSG00000198815	FOXJ3	-0.393813	0.018905663
ENSG00000139289	PHLDA1	-0.526743	0.018973006
ENSG00000185222	WBP5	-0.470128	0.018973006
ENSG00000171466	ZNF562	0.417232	0.019005296
ENSG00000198887	SMC5	-0.367314	0.019021895
ENSG00000163848	ZNF148	-0.717325	0.019055577
ENSG00000152256	PDK1	-0.487406	0.019055577
ENSG00000108861	DUSP3	-0.369002	0.019128045
ENSG00000177494	ZBED2	-0.760122	0.019128045
ENSG00000182022	CHST15	0.447496	0.019128045
ENSG00000112977	DAP	-0.355892	0.019128045
ENSG00000272579	RP11-101E13.5	-1.23765	0.019314695
ENSG00000203668	CHML	-0.41436	0.019314695
ENSG00000137764	MAP2K5	0.524605	0.019314695
ENSG00000144026	ZNF514	1.01396	0.019339039
ENSG00000112659	CUL9	0.707497	0.019434409
ENSG00000005206	SPPL2B	0.778561	0.019434409
ENSG00000149231	CCDC82	-0.556031	0.019571543
ENSG00000101955	SRPX	-0.459234	0.019571543
ENSG00000076706	MCAM	0.621056	0.019571543
ENSG00000135919	SERPINE2	-0.393619	0.019650899
ENSG00000261490	RP11-448G15.3	-0.653665	0.019840156
ENSG00000170315	UBB	0.43545	0.019907193
ENSG00000196218	RYR1	0.564808	0.019911628
ENSG00000188786	MTF1	-0.452451	0.019935883
ENSG00000164327	RICTOR	-0.340314	0.020017135
ENSG00000149243	KLHL35	0.80183	0.020018045
ENSG00000120217	CD274	-1.27195	0.020018045
ENSG00000142892	PIGK	-0.372864	0.020081994
ENSG00000163814	CDCP1	-0.381094	0.020158675
ENSG00000102996	MMP15	0.588434	0.020182808
ENSG00000174749	C4orf32	-0.588654	0.020218704
ENSG00000090060	PAPOLA	-0.302866	0.020361885
ENSG00000182220	ATP6AP2	-0.682001	0.020361885
ENSG00000162959	MEMO1	-0.412351	0.020427313
ENSG00000167468	GPX4	0.28824	0.020493298
ENSG00000204256	BRD2	0.24016	0.020529144
ENSG00000186591	UBE2H	-0.227679	0.020630133
ENSG00000197296	FITM2	0.612058	0.020640036
ENSG00000107954	NEURL1	1.38941	0.020679272
ENSG00000174100	MRPL45	0.396382	0.02075209
ENSG00000100811	YY1	-0.229319	0.020833177
ENSG00000111647	UHRF1BP1L	-0.422887	0.020855147
ENSG00000136021	SCYL2	-0.39596	0.020942338
ENSG00000164548	TRA2A	-0.43201	0.021003983
ENSG00000173548	SNX33	0.42067	0.021010591
ENSG00000197632	SERPINB2	-0.793815	0.021026673
ENSG00000186815	TPCN1	0.858843	0.021073508
ENSG00000001629	ANKIB1	-0.264302	0.021113936
ENSG00000271303	SRXN1	0.387137	0.021159088
ENSG00000112739	PRPF4B	-0.31389	0.021563738
ENSG00000103653	CSK	0.44862	0.021584039
ENSG00000182180	MRPS16	0.596321	0.021721792
ENSG00000175105	ZNF654	-0.583953	0.021729091
ENSG00000217128	FNIP1	-0.398787	0.021774742
ENSG00000153066	TXNDC11	0.579137	0.021792889
ENSG00000085365	SCAMP1	-0.46958	0.021814064
ENSG00000172062	SMN1	-0.468795	0.021816301
ENSG00000144583	4-Mar	-0.674814	0.021816301
ENSG00000140181	HERC2P2	0.695295	0.021936368
ENSG00000108292	MLLT6	0.475887	0.021975124
ENSG00000229644	NAMPTL	-0.431067	0.021998763
ENSG00000124224	PPP4R1L	-0.618121	0.022170354
ENSG00000172046	USP19	0.415397	0.022194232
ENSG00000116489	CAPZA1	-0.244847	0.02223255
ENSG00000214753	HNRNPUL2	0.252784	0.02223255
ENSG00000082497	SERTAD4	-0.536556	0.022363046
ENSG00000164031	DNAJB14	-0.478339	0.022426012
ENSG00000064726	BTBD1	-0.311536	0.022510539
ENSG00000168685	IL7R	-2.97719	0.02258242
ENSG00000182199	SHMT2	0.380357	0.022645699
ENSG00000120129	DUSP1	0.795391	0.022645699
ENSG00000258727	RP11-66N24.3	1.46646	0.022645699
ENSG00000100522	GNPNAT1	-0.543412	0.022645699
ENSG00000026652	AGPAT4	-0.577873	0.022663721
ENSG00000096384	HSP90AB1	-0.319544	0.022663721
ENSG00000162413	KLHL21	0.370532	0.022684986
ENSG00000105647	PIK3R2	2.51247	0.022700517
ENSG00000119760	SUPT7L	-0.396393	0.022821407
ENSG00000064651	SLC12A2	-0.395079	0.022821407
ENSG00000115526	CHST10	0.751686	0.022833652
ENSG00000171862	PTEN	-0.288161	0.022986325
ENSG00000180817	PPA1	-0.261269	0.022989255
ENSG00000160789	LMNA	-0.224565	0.022989255
ENSG00000139618	BRCA2	-0.441555	0.023050177
ENSG00000169018	FEM1B	-0.297247	0.023050177
ENSG00000140474	ULK3	0.557488	0.023101089
ENSG00000146247	PHIP	-0.376735	0.02313423
ENSG00000146426	TIAM2	-0.742099	0.023239194
ENSG00000132024	CC2D1A	0.521121	0.023309447
ENSG00000138448	ITGAV	-0.390368	0.0233266
ENSG00000146376	ARHGAP18	-0.504597	0.023335502
ENSG00000005001	PRSS22	0.644813	0.023464682
ENSG00000085433	WDR47	-0.360003	0.023543013
ENSG00000157483	MYO1E	-0.409173	0.023543013
ENSG00000143891	GALM	0.893334	0.02358587
ENSG00000177602	GSG2	0.766484	0.02358587
ENSG00000125633	CCDC93	-0.298127	0.02358587
ENSG00000001617	SEMA3F	0.363533	0.0237281
ENSG00000149016	TUT1	-1.00943	0.0237281
ENSG00000141956	PRDM15	0.60016	0.023805772
ENSG00000118971	CCND2	-0.329931	0.024007854
ENSG00000158467	AHCYL2	-0.555282	0.024052805
ENSG00000123066	MED13L	-0.258211	0.024092884
ENSG00000149256	TENM4	-1.22331	0.024157613
ENSG00000197323	TRIM33	-0.305372	0.024249127
ENSG00000164292	RHOBTB3	-0.368924	0.024289908
ENSG00000101856	PGRMC1	-0.290837	0.024434379
ENSG00000122417	ODF2L	-0.402248	0.024524487
ENSG00000159388	BTG2	0.563589	0.024538964
ENSG00000176444	CLK2	0.476557	0.024596424
ENSG00000176641	RNF152	-0.344291	0.024645178
ENSG00000163171	CDC42EP3	-0.395655	0.024666389
ENSG00000171444	MCC	-0.397687	0.024666389
ENSG00000223573	TINCR	0.726401	0.024666389
ENSG00000172167	MTBP	-0.407972	0.024719244
ENSG00000159322	ADPGK	0.53351	0.024762149
ENSG00000135823	STX6	-0.354072	0.024782396
ENSG00000112210	RAB23	-0.426475	0.024782396
ENSG00000157538	DSCR3	-0.442994	0.024806744
ENSG00000058453	CROCC	0.698288	0.024891935
ENSG00000057663	ATG5	-0.373582	0.024925299
ENSG00000257151	PWAR6	-1.22878	0.024940103
ENSG00000162063	CCNF	0.376535	0.024940103
ENSG00000160117	ANKLE1	0.871319	0.024961684
ENSG00000115020	PIKFYVE	-0.35445	0.02580494
ENSG00000122482	ZNF644	-0.403696	0.02581018
ENSG00000135968	GCC2	-0.324761	0.025897082
ENSG00000205758	CRYZL1	-0.597099	0.025946446
ENSG00000110841	PPFIBP1	-0.52552	0.025967003
ENSG00000148634	HERC4	-0.333182	0.02602357
ENSG00000140497	SCAMP2	0.353559	0.026091228
ENSG00000168575	SLC20A2	-0.327971	0.02621389
ENSG00000160211	G6PD	0.330629	0.026239742
ENSG00000167113	COQ4	0.55164	0.026239742
ENSG00000240891	PLCXD2	-0.582651	0.026239742
ENSG00000091592	NLRP1	-0.496309	0.026258425
ENSG00000157036	EXOG	1.15732	0.026263892
ENSG00000259623	RP11-156E6.1	-0.634331	0.026419663
ENSG00000125148	MT2A	-0.444545	0.026493442
ENSG00000108091	CCDC6	-0.36945	0.026504458
ENSG00000113194	FAF2	-0.302308	0.026572151
ENSG00000161904	LEMD2	0.395512	0.026580434
ENSG00000075651	PLD1	0.568689	0.026585984
ENSG00000109182	CWH43	0.487238	0.026685904
ENSG00000114503	NCBP2	-0.333175	0.02673229
ENSG00000064313	TAF2	-0.311473	0.026946072
ENSG00000149084	HSD17B12	-0.454785	0.027025125
ENSG00000148400	NOTCH1	0.434245	0.027063334
ENSG00000255633	MTRNR2L9	0.460778	0.027063334
ENSG00000107281	NPDC1	0.617941	0.027092116
ENSG00000169914	OTUD3	-0.45879	0.027261785
ENSG00000154608	CEP170P1	-0.450595	0.027267308
ENSG00000148719	DNAJB12	0.563951	0.027377333
ENSG00000028310	BRD9	0.61255	0.027411332
ENSG00000167967	E4F1	1.04266	0.027445591
ENSG00000106366	SERPINE1	-0.676896	0.027445591
ENSG00000179409	GEMIN4	0.790212	0.027445758
ENSG00000124171	PARD6B	-0.479521	0.027472118
ENSG00000108106	UBE2S	0.373213	0.027472118
ENSG00000160131	VMA21	-0.425516	0.02786455
ENSG00000102384	CENPI	-0.58475	0.027935105
ENSG00000165006	UBAP1	-0.328033	0.027935105
ENSG00000152778	IFIT5	0.875312	0.028012144
ENSG00000176532	PRR15	0.842451	0.028103962
ENSG00000077044	DGKD	0.410746	0.028103962
ENSG00000091136	LAMB1	-0.308883	0.028103962
ENSG00000079999	KEAP1	0.478947	0.028146614
ENSG00000133056	PIK3C2B	0.596881	0.028262198
ENSG00000125618	PAX8	0.880999	0.028279676
ENSG00000159792	PSKH1	1.03049	0.02836165
ENSG00000155660	PDIA4	-0.264712	0.02839718
ENSG00000186660	ZFP91	-0.259477	0.028428409
ENSG00000169908	TM4SF1	-0.822819	0.028547089
ENSG00000150347	ARID5B	-0.479825	0.028666133
ENSG00000141068	KSR1	1.30016	0.028755557
ENSG00000119401	TRIM32	0.577514	0.028887295
ENSG00000168453	HR	0.528733	0.028938572
ENSG00000196396	PTPN1	-0.459109	0.028983092
ENSG00000105223	PLD3	0.392231	0.02907781
ENSG00000179913	B3GNT3	0.546619	0.029421955
ENSG00000034152	MAP2K3	-0.344861	0.029525622
ENSG00000105778	AVL9	-0.365524	0.029528306
ENSG00000168140	VASN	0.73949	0.029528306
ENSG00000215033	AL603965.1	-0.666896	0.02953795
ENSG00000255103	KIAA0754	-0.819202	0.029578141
ENSG00000144893	MED12L	-1.68203	0.029633488
ENSG00000121690	DEPDC7	-0.607738	0.029633488
ENSG00000162981	FAM84A	-1.2733	0.029633488
ENSG00000003393	ALS2	-0.302551	0.029642688
ENSG00000102580	DNAJC3	-0.280845	0.029659646
ENSG00000168883	USP39	-0.442583	0.029782842
ENSG00000148600	CDHR1	1.30237	0.029794575
ENSG00000012211	PRICKLE3	0.735362	0.029881432
ENSG00000213024	NUP62	0.475005	0.029900431
ENSG00000153339	TRAPPC8	-0.291226	0.029944693
ENSG00000104341	LAPTM4B	-0.313351	0.030047053
ENSG00000101158	NELFCD	0.413162	0.030068298
ENSG00000181220	ZNF746	0.549926	0.030068298
ENSG00000198185	ZNF334	0.609447	0.030068298
ENSG00000261116	RP3-523K23.2	-0.451634	0.030184769
ENSG00000151458	ANKRD50	0.510636	0.030384606
ENSG00000145860	RNF145	0.444101	0.030399913
ENSG00000153071	DAB2	-0.631381	0.03046828
ENSG00000129515	SNX6	-0.409772	0.03046828
ENSG00000169740	ZNF32	0.72719	0.03053292
ENSG00000005810	MYCBP2	-0.395319	0.03053292
ENSG00000216490	IFI30	0.866336	0.030556659
ENSG00000255248	RP11-166D19.1	-0.68489	0.030802971
ENSG00000113368	LMNB1	0.35623	0.030870147
ENSG00000090861	AARS	0.252755	0.030954395
ENSG00000172175	MALT1	-0.416661	0.031084166
ENSG00000272695	GAS6-AS2	-0.751948	0.031091195
ENSG00000040531	CTNS	0.841447	0.031091195
ENSG00000104442	ARMC1	-0.371376	0.031091195
ENSG00000108523	RNF167	0.765789	0.031178841
ENSG00000070495	JMJD6	-0.379101	0.031186669
ENSG00000171813	PWWP2B	0.54664	0.031283828
ENSG00000095564	BTAF1	-0.271182	0.031284239
ENSG00000109606	DHX15	-0.239403	0.031414861
ENSG00000155508	CNOT8	-0.849193	0.031464199
ENSG00000171307	ZDHHC16	0.603423	0.031464199
ENSG00000111145	ELK3	-0.368582	0.031464199
ENSG00000186448	ZNF197	0.462887	0.031464199
ENSG00000136167	LCP1	-0.889227	0.031464199
ENSG00000061938	TNK2	0.390678	0.031464199
ENSG00000006744	ELAC2	0.445792	0.031497174
ENSG00000106609	TMEM248	-0.361678	0.031598561
ENSG00000135046	ANXA1	-0.233281	0.031601586
ENSG00000164543	STK17A	-0.385234	0.031611257
ENSG00000107581	EIF3A	-0.192475	0.031744778
ENSG00000136271	DDX56	0.508713	0.031744778
ENSG00000264058	KRT222	-2.90547	0.031757931
ENSG00000197724	PHF2	0.384001	0.032056208
ENSG00000046604	DSG2	-0.240255	0.032056208
ENSG00000166923	GREM1	-0.696863	0.03205911
ENSG00000048471	SNX29	-0.462077	0.032063921
ENSG00000221890	NPTXR	1.34884	0.032102136
ENSG00000102870	ZNF629	0.473528	0.03230572
ENSG00000240476	LINC00973	-0.903973	0.0325765
ENSG00000262160	RP11-96D1.11	0.92446	0.032665074
ENSG00000172831	CES2	0.68899	0.032717012
ENSG00000131791	PRKAB2	-0.288373	0.032765065
ENSG00000105877	DNAH11	-0.799621	0.03280489
ENSG00000076944	STXBP2	0.520405	0.032832827
ENSG00000042445	RETSAT	0.473588	0.032922165
ENSG00000196453	ZNF777	0.570292	0.032922165
ENSG00000205485	AC004980.7	-0.633644	0.032922165
ENSG00000234857	HNRNPUL2-BSCL2	3.10525	0.032961917
ENSG00000169118	CSNK1G1	-0.345078	0.032961917
ENSG00000134333	LDHA	-0.394771	0.032961917
ENSG00000184254	ALDH1A3	0.299936	0.032972706
ENSG00000146834	MEPCE	0.389565	0.032972706
ENSG00000085832	EPS15	-0.262176	0.032972706
ENSG00000259901	RP5-991G20.4	0.806088	0.032972706
ENSG00000137364	TPMT	-0.361193	0.032972706
ENSG00000169504	CLIC4	-0.368884	0.033059273
ENSG00000104687	GSR	0.790582	0.033059273
ENSG00000077312	SNRPA	-0.43365	0.033320013
ENSG00000072310	SREBF1	0.496567	0.033402079
ENSG00000226608	FTLP3	0.607063	0.033402079
ENSG00000225138	CTD-2228K2.7	0.541208	0.033402079
ENSG00000171940	ZNF217	-0.285596	0.033499762
ENSG00000162144	CYB561A3	0.636009	0.033575781
ENSG00000173120	KDM2A	-0.216022	0.033765449
ENSG00000155096	AZIN1	-0.327238	0.033828735
ENSG00000125821	DTD1	0.334356	0.033901366
ENSG00000134215	VAV3	0.62634	0.033901366
ENSG00000135454	B4GALNT1	0.502697	0.033985437
ENSG00000071655	MBD3	0.396947	0.034022984
ENSG00000172965	MIR4435-1HG	-0.429672	0.034022984
ENSG00000145147	SLIT2	-0.775924	0.034022984
ENSG00000118496	FBXO30	-0.385078	0.034022984
ENSG00000167377	ZNF23	-0.454601	0.034052912
ENSG00000128510	CPA4	-0.754583	0.034135779
ENSG00000137200	CMTR1	0.387816	0.034179412
ENSG00000087842	PIR	0.662469	0.034230503
ENSG00000204314	PRRT1	0.98871	0.034237453
ENSG00000092439	TRPM7	-0.280899	0.034273869
ENSG00000095066	HOOK2	0.881488	0.034305714
ENSG00000027697	IFNGR1	-0.389062	0.034305714
ENSG00000147065	MSN	-0.27335	0.034305714
ENSG00000164296	TIGD6	1.08796	0.034371991
ENSG00000067646	ZFY	-0.842159	0.034518759
ENSG00000163870	TPRA1	0.387841	0.034639915
ENSG00000112773	FAM46A	-0.544096	0.034703764
ENSG00000267645	POLR2J2	-8.52383	0.034703764
ENSG00000151500	THYN1	0.590676	0.034703764
ENSG00000116266	STXBP3	-0.360575	0.034756562
ENSG00000109320	NFKB1	-0.373102	0.034911227
ENSG00000119431	HDHD3	0.928337	0.03493696
ENSG00000139263	LRIG3	0.615807	0.03493696
ENSG00000205726	ITSN1	-0.357855	0.03493696
ENSG00000101193	GID8	0.315709	0.03493696
ENSG00000138772	ANXA3	-0.217351	0.03493696
ENSG00000070413	DGCR2	0.375378	0.034971159
ENSG00000206053	HN1L	-0.583886	0.034990904
ENSG00000169919	GUSB	0.464989	0.035025146
ENSG00000264112	RP11-159D12.2	-0.659292	0.035037126
ENSG00000142192	APP	0.186098	0.035037126
ENSG00000103319	EEF2K	0.623364	0.035073662
ENSG00000168785	TSPAN5	-0.42179	0.035073662
ENSG00000126945	HNRNPH2	-0.373985	0.035242739
ENSG00000131236	CAP1	-0.317244	0.035253267
ENSG00000151572	ANO4	-0.477053	0.035269584
ENSG00000158161	EYA3	-1.02495	0.035457765
ENSG00000124151	NCOA3	-0.36204	0.035506582
ENSG00000245848	CEBPA	1.04561	0.035506582
ENSG00000238164	RP3-395M20.8	1.11029	0.035578187
ENSG00000162601	MYSM1	-0.360248	0.035613277
ENSG00000223745	RP4-717I23.3	0.908908	0.035637762
ENSG00000033050	ABCF2	0.346819	0.035835953
ENSG00000166478	ZNF143	-0.571296	0.036043361
ENSG00000226887	ERVMER34-1	0.742613	0.036065069
ENSG00000132825	PPP1R3D	0.792286	0.036141969
ENSG00000160685	ZBTB7B	0.674244	0.03650581
ENSG00000129270	MMP28	0.99723	0.036637329
ENSG00000091490	SEL1L3	0.476785	0.036693398
ENSG00000144642	RBMS3	-1.24599	0.036694886
ENSG00000180287	PLD5	-0.733919	0.036712021
ENSG00000164414	SLC35A1	0.729793	0.036726099
ENSG00000011347	SYT7	0.44544	0.037007523
ENSG00000204386	NEU1	0.76224	0.037007523
ENSG00000065534	MYLK	0.577289	0.037277309
ENSG00000198626	RYR2	-0.537765	0.037293504
ENSG00000261355	RP11-698N11.4	-0.733257	0.037414314
ENSG00000118922	KLF12	-0.356739	0.037660788
ENSG00000164509	IL31RA	-0.470204	0.037660788
ENSG00000064601	CTSA	0.281273	0.037710205
ENSG00000141367	CLTC	-0.16708	0.037710205
ENSG00000102172	SMS	-0.305684	0.037710205
ENSG00000037042	TUBG2	0.504226	0.037853882
ENSG00000105866	SP4	-0.36128	0.037923301
ENSG00000107816	LZTS2	0.544991	0.037923301
ENSG00000029725	RABEP1	0.465224	0.037946255
ENSG00000172493	AFF1	-0.559222	0.037961597
ENSG00000110492	MDK	0.447421	0.037987271
ENSG00000198729	PPP1R14C	-0.266846	0.037987271
ENSG00000177042	TMEM80	0.367085	0.037991431
ENSG00000099889	ARVCF	0.694864	0.038271421
ENSG00000103966	EHD4	-0.359032	0.038492931
ENSG00000133895	MEN1	0.445387	0.038492931
ENSG00000166173	LARP6	0.396289	0.03904862
ENSG00000113645	WWC1	-0.60063	0.039080863
ENSG00000013523	ANGEL1	0.702785	0.039080863
ENSG00000138463	DIRC2	0.463283	0.039080863
ENSG00000183098	GPC6	-0.429394	0.039080863
ENSG00000110713	NUP98	-0.229065	0.039080863
ENSG00000164096	C4orf3	-0.464356	0.039080863
ENSG00000132688	NES	0.466645	0.039080863
ENSG00000215012	C22orf29	0.690253	0.039080863
ENSG00000075292	ZNF638	-0.398662	0.039219022
ENSG00000121895	TMEM156	-0.41973	0.039235014
ENSG00000108840	HDAC5	0.443129	0.039235014
ENSG00000112245	PTP4A1	-0.323105	0.039269877
ENSG00000198146	ZNF770	-0.336663	0.039457059
ENSG00000186432	KPNA4	-0.262891	0.039498423
ENSG00000070367	EXOC5	-0.384162	0.039498423
ENSG00000106588	PSMA2	-0.677246	0.039709433
ENSG00000071054	MAP4K4	-0.340464	0.039781506
ENSG00000147044	CASK	0.320637	0.039838108
ENSG00000204839	MROH6	0.483285	0.040022938
ENSG00000137857	DUOX1	0.642887	0.040039475
ENSG00000171453	POLR1C	0.488488	0.040074991
ENSG00000234684	SDCBP2-AS1	0.764727	0.040164554
ENSG00000159082	SYNJ1	-0.408098	0.040202582
ENSG00000142627	EPHA2	-0.330359	0.040202582
ENSG00000177732	SOX12	0.33487	0.040202582
ENSG00000188883	KLRG2	1.23855	0.040323229
ENSG00000144840	RABL3	-1.04424	0.040578078
ENSG00000206149	HERC2P9	0.604102	0.040692397
ENSG00000130311	DDA1	-0.559297	0.040699733
ENSG00000161547	SRSF2	0.827006	0.040699733
ENSG00000132950	ZMYM5	-0.427801	0.040699733
ENSG00000272752	STAG3L5P-PVRIG2P-PILRB	1.31181	0.040896375
ENSG00000188933	USP32P1	-1.48262	0.040896375
ENSG00000146918	NCAPG2	-0.323185	0.040961957
ENSG00000163739	CXCL1	-0.956313	0.041071941
ENSG00000189308	LIN54	-0.304256	0.04107309
ENSG00000058673	ZC3H11A	-0.241351	0.041081518
ENSG00000156587	UBE2L6	0.635576	0.04110507
ENSG00000197355	UAP1L1	0.591585	0.041197906
ENSG00000072210	ALDH3A2	0.377146	0.041227999
ENSG00000171388	APLN	-1.21265	0.041302855
ENSG00000158985	CDC42SE2	-1.1839	0.041526276
ENSG00000139132	FGD4	-0.660748	0.041615742
ENSG00000100380	ST13	-0.228285	0.041765791
ENSG00000151718	WWC2	-0.547579	0.041765791
ENSG00000156052	GNAQ	-0.264988	0.041765791
ENSG00000167395	ZNF646	0.993908	0.041868453
ENSG00000125841	NRSN2	0.67871	0.041882834
ENSG00000230825	AC005532.5	-0.809383	0.041882834
ENSG00000197299	BLM	-0.38015	0.041882834
ENSG00000147202	DIAPH2	-0.564612	0.041882834
ENSG00000120742	SERP1	-0.297745	0.041882834
ENSG00000132669	RIN2	0.38356	0.041885854
ENSG00000169174	PCSK9	0.272729	0.041885854
ENSG00000269657	AC079210.1	-1.13221	0.041885854
ENSG00000198276	UCKL1	0.418679	0.042121366
ENSG00000162777	DENND2D	0.74609	0.042121366
ENSG00000213190	MLLT11	-0.396248	0.042121366
ENSG00000108950	FAM20A	-1.52401	0.042121366
ENSG00000261597	RP11-353B9.1	-0.825995	0.042173611
ENSG00000135316	SYNCRIP	-0.208307	0.042215704
ENSG00000168522	FNTA	-0.324579	0.0422922
ENSG00000145293	ENOPH1	-0.317775	0.0422922
ENSG00000168286	THAP11	0.581439	0.0422922
ENSG00000140534	TICRR	0.475257	0.0422922
ENSG00000179364	PACS2	0.492234	0.0422922
ENSG00000118961	C2orf43	-0.480361	0.0422922
ENSG00000127914	AKAP9	-0.365121	0.042442334
ENSG00000022567	SLC45A4	0.43203	0.042442334
ENSG00000029363	BCLAF1	-0.239124	0.042542796
ENSG00000152022	LIX1L	-0.492242	0.042542796
ENSG00000138061	CYP1B1	0.887661	0.042542796
ENSG00000180611	MB21D2	-0.451008	0.042585063
ENSG00000182325	FBXL6	1.06416	0.042604167
ENSG00000117676	RPS6KA1	-0.435292	0.042653429
ENSG00000105612	DNASE2	0.45972	0.042697206
ENSG00000119537	KDSR	-0.257728	0.04288468
ENSG00000167608	TMC4	0.795682	0.04290445
ENSG00000163235	TGFA	-0.319044	0.042987928
ENSG00000124356	STAMBP	-0.650259	0.04304001
ENSG00000196411	EPHB4	0.354149	0.04304001
ENSG00000068697	LAPTM4A	-0.201532	0.043100041
ENSG00000100503	NIN	-0.250863	0.043316982
ENSG00000128692	EIF2S2P4	-0.309171	0.043316982
ENSG00000108375	RNF43	-0.295251	0.043316982
ENSG00000143401	ANP32E	-0.388635	0.043511669
ENSG00000148843	PDCD11	0.244437	0.043522798
ENSG00000138050	THUMPD2	-0.591632	0.043522798
ENSG00000126804	ZBTB1	-0.497553	0.043522798
ENSG00000145780	FEM1C	-0.351277	0.0435406
ENSG00000078487	ZCWPW1	0.608661	0.043565833
ENSG00000143033	MTF2	-0.61477	0.043576712
ENSG00000172943	PHF8	0.563539	0.043604705
ENSG00000157827	FMNL2	-0.328625	0.043678498
ENSG00000108468	CBX1	-0.339981	0.043725566
ENSG00000177606	JUN	-0.341664	0.043734378
ENSG00000168528	SERINC2	0.286389	0.043802235
ENSG00000189159	HN1	-0.359471	0.043829593
ENSG00000169756	LIMS1	-0.952878	0.043964175
ENSG00000267519	MIR24-2	0.797779	0.043964175
ENSG00000181830	SLC35C1	0.790482	0.043987277
ENSG00000166532	RIMKLB	-0.575851	0.043995597
ENSG00000084073	ZMPSTE24	-0.320279	0.044082671
ENSG00000174738	NR1D2	-0.359942	0.044249337
ENSG00000165905	GYLTL1B	0.781868	0.044554807
ENSG00000156463	SH3RF2	-0.578344	0.04467826
ENSG00000112237	CCNC	-0.405184	0.044748459
ENSG00000182963	GJC1	-0.444915	0.044850161
ENSG00000003756	RBM5	0.378546	0.044850161
ENSG00000100439	ABHD4	0.289246	0.044850161
ENSG00000198315	ZKSCAN8	-0.291973	0.044850161
ENSG00000107105	ELAVL2	-0.409747	0.045061669
ENSG00000104497	SNX16	-0.631813	0.045081339
ENSG00000151748	SAV1	-0.423357	0.045085792
ENSG00000157654	PALM2-AKAP2	-1.86343	0.045085792
ENSG00000134308	YWHAQ	-0.32026	0.045085792
ENSG00000130150	MOSPD2	-0.335618	0.045772694
ENSG00000138172	CALHM2	0.61184	0.045910831
ENSG00000114993	RTKN	0.661308	0.046086179
ENSG00000138942	RNF185	-0.884753	0.046204572
ENSG00000105518	TMEM205	0.551929	0.046204572
ENSG00000107554	DNMBP	-0.300086	0.046204572
ENSG00000168758	SEMA4C	0.624484	0.046340658
ENSG00000068028	RASSF1	-0.438253	0.046350995
ENSG00000160072	ATAD3B	0.460857	0.046464456
ENSG00000198517	MAFK	0.536443	0.046464456
ENSG00000141905	NFIC	1.09173	0.046464456
ENSG00000149970	CNKSR2	-0.99311	0.046464456
ENSG00000149679	CABLES2	0.55091	0.046464456
ENSG00000080822	CLDND1	-0.666971	0.046464456
ENSG00000132002	DNAJB1	0.224882	0.046736113
ENSG00000138835	RGS3	-0.318793	0.046736113
ENSG00000140992	PDPK1	-1.29121	0.046791306
ENSG00000117450	PRDX1	-0.256604	0.046792718
ENSG00000008130	NADK	0.412566	0.046792718
ENSG00000149554	CHEK1	-0.325331	0.046792718
ENSG00000237686	RP5-1120P11.1	0.95539	0.046938369
ENSG00000166908	PIP4K2C	-0.547409	0.047019185
ENSG00000153989	NUS1	-0.281459	0.047020395
ENSG00000124570	SERPINB6	0.314182	0.047232183
ENSG00000184371	CSF1	-0.981163	0.047337548
ENSG00000222041	LINC00152	-0.522763	0.047389086
ENSG00000131504	DIAPH1	-0.181443	0.047498292
ENSG00000129197	RPAIN	0.498	0.047498292
ENSG00000108582	CPD	0.25458	0.047547197
ENSG00000134709	HOOK1	-0.316235	0.047786522
ENSG00000185070	FLRT2	-0.368975	0.047797488
ENSG00000244694	PTCHD4	-0.88343	0.047800107
ENSG00000108848	LUC7L3	-0.361316	0.047878402
ENSG00000067900	ROCK1	-0.275784	0.048293106
ENSG00000157551	KCNJ15	-0.988999	0.048349946
ENSG00000143337	TOR1AIP1	-0.640799	0.048565841
ENSG00000189280	GJB5	0.544144	0.048622015
ENSG00000235162	C12orf75	-0.292609	0.048622015
ENSG00000185728	YTHDF3	-1.788	0.048622015
ENSG00000131067	GGT7	0.413634	0.049105814
ENSG00000138356	AOX1	-0.577249	0.049212923
ENSG00000188486	H2AFX	0.377062	0.049212923
ENSG00000090661	CERS4	0.780941	0.049212923
ENSG00000260966	RP11-690D19.3	-1.1455	0.049212923
ENSG00000000460	C1orf112	-0.395055	0.049212923
ENSG00000110429	FBXO3	-0.393269	0.049212923
ENSG00000198668	CALM1	-0.262236	0.049256513
ENSG00000163513	TGFBR2	-0.270284	0.049332986
ENSG00000132846	ZBED3	0.43116	0.049383615
ENSG00000068097	HEATR6	0.425725	0.049459473
ENSG00000230989	HSBP1	-0.264868	0.049516245
ENSG00000024048	UBR2	-0.232668	0.049528947
ENSG00000155363	MOV10	0.54555	0.049597952
ENSG00000008282	SYPL1	-0.296998	0.049597952
ENSG00000184545	DUSP8	-0.651296	0.04984281
