# Supplementary material for: 1,25-Dihydroxyvitamin D3 Suppresses Prognostic Survival Biomarkers Associated with Cell Cycle and Actin Organization in a Non-Malignant African American Prostate Cell Line
Source: Biology (Basel). 2024 May 15;13(5):346. doi: 10.3390/biology13050346 (PMC11118023; doi:10.3390/biology13050346)
Supplement: Supplementary file 1 [file biology-13-00346-s001.zip › ST2_IPA analysis Top20 canonical pathways.xlsx]

## Sheet: Suppl Table S2
Supplemental Table S2: Ingenuity Pathway Analysis identified top 20 Canonical Pathways of RNAseq analysis (p < 0.05).
Ingenuity Canonical Pathways	-log(p-value)	z-score
Actin Cytoskeleton Signaling	9.13	-2.92
Renal Cell Carcinoma Signaling	7.72	-2.324
Integrin Signaling	7.66	-2.744
Clathrin-mediated Endocytosis Signaling	7.45	NaN
Role of Tissue Factor in Cancer	7.44	NaN
Pancreatic Adenocarcinoma Signaling	6.81	-0.894
Ferroptosis Signaling Pathway	6.8	-2.502
MSP-RON Signaling In Cancer Cells Pathway	6.62	-2.646
Neurotrophin/TRK Signaling	6.54	-2.524
Senescence Pathway	6.41	-3.015
Regulation Of The Epithelial Mesenchymal Transition By Growth Factors Pathway	6.22	-1.915
Non-Small Cell Lung Cancer Signaling	6.16	-1.807
B Cell Receptor Signaling	6.14	-1.915
Regulation of the Epithelial-Mesenchymal Transition Pathway	6.06	NaN
HGF Signaling	5.96	-2.357
NRF2-mediated Oxidative Stress Response	5.87	-1.706
T Cell Receptor Signaling	5.87	NaN
Melanoma Signaling	5.84	-1.387
HIPPO signaling	5.79	-1.155
