# Supplementary material for: 1,25-Dihydroxyvitamin D3 Suppresses Prognostic Survival Biomarkers Associated with Cell Cycle and Actin Organization in a Non-Malignant African American Prostate Cell Line
Source: Biology (Basel). 2024 May 15;13(5):346. doi: 10.3390/biology13050346 (PMC11118023; doi:10.3390/biology13050346)
Supplement: Supplementary file 1 [file biology-13-00346-s001.zip › ST3_Pathway Studios gene-gene interactions impacting BP.xlsx]

## Sheet: Protein List 
Supplemental Table S3: Pathway Studios Protein List and Description association with GO
Name	Type	Description	Connectivity	Organism	Swiss-Prot Accession	Alias	Found In Pathways	GO Cellular Component	GO Biological Process	GO Molecular Function
FXYD3	Protein	FXYD domain containing ion transport regulator 3	44	Homo sapiens	Q14802, A6NDE0, C9JDU2, F5H174, F8WB34, Q13211, Q6IB59	MAT8, PLML, FXYD domain-containing ion transport regulator 3, phospholemman-like protein, mammary tumor 8 kDa protein, chloride conductance inducer protein Mat-8, MAT-8 protein isoform 2, MAT-8 protein isoform 2 precursors, MGC111076, MAT-8 protein isoform 1 precursors <more data available...>	Proteins Involved in Pathogenesis of Glioma, hd DP, Neighbors of cell proliferation, Neighbors of cell differentiation, Neighbors of Neoplasms, Neighbors of cell growth, Neighbors of epithelial to mesenchymal transition, Neighbors of Lung Cancer, HH HP, Neighbors of Glioma <more data available...>	integral component of plasma membrane, chloride channel complex, plasma membrane	transmembrane transport, ion transmembrane transport, chloride transport	chloride channel activity
ATP1B1	Protein	ATPase, Na+/K+ transporting, beta 1 polypeptide	126	Homo sapiens, Mus musculus, Rattus norvegicus	A3KLL5, P05026, A6NGH2, P14094, Q3TV47, Q545P0, P07340, Q63062, Q5TGZ3	ATP1B, sodium/potassium-transporting ATPase subunit beta-1, adenosinetriphosphatase, sodium pump subunit beta-1, Na, K-ATPase beta-1 polypeptide, Beta 1-subunit of Na(+),K(+)-ATPase, sodium/potassium-dependent ATPase beta-1 subunit, sodium/potassium-transporting ATPase beta-1 chain, sodium-potassium ATPase subunit beta 1 (non-catalytic), Atpb <more data available...>	Changes of Homeostasis in Myocardial Ischemia, Neighbors of actin organization, Neighbors of morphogenesis, Neighbors of cell polarity, Neighbors of contraction, Neighbors of cell motility, Neighbors of cell proliferation, New Pathway, Neighbors of cell adhesion, Neighbors of Respiratory chain <more data available...>	membrane, integral component of membrane, sodium:potassium-exchanging ATPase complex, caveola, apical plasma membrane, basolateral plasma membrane, plasma membrane	leukocyte migration, ATP catabolic process, blood coagulation, blastocyst development, transmembrane transport, cell adhesion, ion transmembrane transport, sodium ion transmembrane transport, potassium ion transmembrane transport, ion transport <more data available...>	sodium:potassium-exchanging ATPase activity
ACSL1	Protein	acyl-CoA synthetase long-chain family member 1	305	Homo sapiens, Mus musculus, Rattus norvegicus	P33121, E7EPM6, B7Z452, P41216, P18163, Q6GTG6, Q9DBK5, D3DP57, P41215, Q8N8V7 <more data available...>	ACS1, LACS, FACL1, FACL2, LACS1, LACS2, long-chain-fatty-acid--CoA ligase 1, LACS 1, LACS 2, acyl-CoA synthetase 1 <more data available...>	Obesity Induced Insulin Resistance in Myocytes, Insulin Resistance in Hepatocytes, Insulin Influence on Lipogenesis, Neighbors of cell proliferation, Neighbors of apoptosis, Neighbors of vesicular trafficking, Neighbors of cell growth, Neighbors of internalization, Neighbors of cell differentiation, Neighbors of Neoplasms <more data available...>	membrane, integral component of membrane, endoplasmic reticulum membrane, mitochondrial outer membrane, peroxisomal membrane, plasma membrane, endoplasmic reticulum, mitochondrion, peroxisome, intracellular membrane-bounded organelle	metabolic process, lipid metabolic process, small molecule metabolic process, lipid biosynthetic process, triglyceride biosynthetic process, cellular lipid metabolic process, fatty acid metabolic process, long-chain fatty acid metabolic process, unsaturated fatty acid metabolic process, alpha-linolenic acid metabolic process <more data available...>	long-chain fatty acid-CoA ligase activity, catalytic activity, ligase activity, acetate-CoA ligase (ADP-forming) activity, acetate-CoA ligase activity, nucleotide binding, ATP binding
G6PD	Protein	glucose-6-phosphate dehydrogenase	653	Homo sapiens, Mus musculus, Rattus norvegicus	P11413, Q00612, Q790Y8, P05370, D3DWX9, Q16000, Q16765, Q8IU70, Q8IU88, Q8IUA6 <more data available...>	G6PD1, glucose-6-phosphate 1-dehydrogenase, glucose-6-phosphate dehydrogenase, G6PD, G28A, G6pd, Gpdx, RP23-436K3.17-003, glucose-6-phosphate 1-dehydrogenase X, G6pdx, glucose-6-phosphate dehydrogenase X-linked <more data available...>	Overview of Mitochondrial Dysfunction in Alzheimer's Disease, Tricarboxylic Acid Cycle Involvement in Alzheimer's Disease, Multiple Functions of Estrogen in Mitochondria in Alzheimer's Disease, Proteins Involved in Pathogenesis of Congenital Hypothyroidism, Thyroid Hormones in Adipose Tissue Metabolism, Proteins Involved in Pathogenesis of Pulmonary Hypertension, Neighbors of cell redox homeostas…	cytoplasmic side of plasma membrane, centrosome, cytoplasm, cytosol, intracellular membrane-bounded organelle, nucleus	erythrocyte development, erythrocyte maturation, lipid metabolic process, small molecule metabolic process, oxidation-reduction process, pentose biosynthetic process, cholesterol biosynthetic process, NADP biosynthetic process, pentose-phosphate shunt, pentose-phosphate shunt, oxidative branch <more data available...>	oxidoreductase activity, glucose-6-phosphate dehydrogenase activity, carbohydrate binding, protein homodimerization activity, NADP binding, glucose binding
CEBPD	Protein	CCAAT/enhancer binding protein (C/EBP), delta	688	Homo sapiens, Mus musculus	P49716, B9EIA9, Q00322, Q3UE64, Q3U937, Q8BW92, Q14937, Q2M2X9	CELF, CRP3, C/EBP-delta, NF-IL6-beta, CCAAT/enhancer-binding protein delta, c/EBP delta, nuclear factor NF-IL6-beta, c/EBP-related protein 3, transcription factor C EBP delta, nuclear factor interleukin 6beta <more data available...>	Graves Ophthalmopathy, VIPR -> CREB/CEBP signaling, cluster 1 anal5uppl data 5, Neighbors of alternative RNA splicing, Neighbors of cell proliferation, Neighbors of transcription activation, Neighbors of cell cycle progression, Neighbors of cell survival, Neighbors of liver function, Neighbors of cell growth <more data available...>	nucleus	positive regulation of osteoblast differentiation, inner ear development, fat cell differentiation, positive regulation of transcription from RNA polymerase II promoter, negative regulation of transcription, DNA-templated, regulation of transcription, DNA-templated, regulation of transcription from RNA polymerase II promoter, transcription, DNA-templated, transcription from RNA polymerase II prom…	sequence-specific DNA binding transcription factor activity, protein homodimerization activity, protein heterodimerization activity, DNA binding, sequence-specific DNA binding, transcription regulatory region DNA binding
JUN	Protein	jun proto-oncogene	3134	Homo sapiens, Mus musculus, Rattus norvegicus	P05412, P05627, Q52L79, P17325, Q96G93	AP1, AP-1, c-Jun, transcription factor AP-1, p39, jun oncogene, activator protein 1, proto-oncogene c-Jun, enhancer-binding protein AP1, Jun activation domain binding protein <more data available...>	Cell Cycle, Kruppel-like Factor 6 Signaling in Prostate Cancer, Contraction-Induced IL6 Up-regulation in Skeletal Muscles, Dystrophin Glycoprotein Complex Signaling in Duchenne Muscular Dystrophy, Ca2+ Overload in Duchenne Muscular Dystrophy, Duchenne Muscular Dystrophy Overview, IL6 Promotes Inflammation, IGF1 in Muscle Hypertrophy, Proteins Involved in Pathogenesis of Alzheimer's Disease, Osteo…	nucleoplasm, nuclear chromosome, transcriptional repressor complex, nuclear chromatin, nuclear euchromatin, transcription factor complex, cytosol, nucleus	cellular process, monocyte differentiation, positive regulation of monocyte differentiation, toll-like receptor signaling pathway, toll-like receptor 4 signaling pathway, toll-like receptor 10 signaling pathway, toll-like receptor 2 signaling pathway, toll-like receptor TLR1:TLR2 signaling pathway, toll-like receptor 5 signaling pathway, toll-like receptor TLR6:TLR2 signaling pathway <more data a…	Rho GTPase activator activity, RNA polymerase II transcription factor binding transcription factor activity involved in positive regulation of transcription, RNA polymerase II core promoter proximal region sequence-specific DNA binding transcription factor activity involved in positive regulation of transcription, transcription coactivator activity, sequence-specific DNA binding transcription fac…
ZNF24	Protein	zinc finger protein 24	47	Homo sapiens, Mus musculus, Rattus norvegicus	P17028, Q91VN1, Q7TNK3, O14754, Q53YE4, Q6ICR5, Q8IZN4, Q5MDG8, Q9WUQ0	KOX17, RSG-A, ZNF191, ZSCAN3, Zfp191, zinc finger protein 24, zinc finger protein 191, lacks zinc finger domain, zinc finger protein KOX17, zinc finger protein 24 (KOX 17) <more data available...>	down reg, all T, all PPI, Neighbors of cell proliferation, Neighbors of embryonal development, Neighbors of cell cycle progression, Neighbors of vascularization, Neighbors of Inflammation, relation 2 T	nucleus	myelination, negative regulation of transcription, DNA-templated, regulation of transcription, DNA-templated, transcription, DNA-templated	sequence-specific DNA binding transcription factor activity, nucleic acid binding, DNA binding, sequence-specific DNA binding, metal ion binding, zinc ion binding
AXL	Protein	AXL receptor tyrosine kinase	426	Homo sapiens, Mus musculus, Rattus norvegicus	M0R0W6, P30530, Q6PE80, Q8CCF8, Q00993, Q8VI99, Q8VIA0, Q80YQ3, Q8N5L2, Q9UD27	UFO, JTK11, tyrosine-protein kinase receptor UFO, AXL oncogene, AXL transforming sequence/gene, Ark, Tyro7, AI323647, ufo oncogene homolog, adhesion-related kinase <more data available...>	Mechanism of Cetuximab Resistance in Colorectal Cancer, Glioma Invasion Signaling, Proteins Involved in Pathogenesis of Glioma, Neighbors of cell proliferation, Neighbors of apoptosis, Neighbors of cell growth, Neighbors of cell cycle, Neighbors of Cancer, Neighbors of Neoplasms, Neighbors of viral reproduction <more data available...>	membrane, cell, integral component of membrane, integral component of plasma membrane, cell surface, intracellular, plasma membrane, extracellular space	immune system process, spermatogenesis, vagina development, ovulation cycle, erythrocyte homeostasis, dendritic cell differentiation, natural killer cell differentiation, positive regulation of natural killer cell differentiation, innate immune response, negative regulation of lymphocyte activation <more data available...>	transmembrane receptor protein tyrosine kinase activity, transferase activity, transferase activity, transferring phosphorus-containing groups, kinase activity, protein kinase activity, protein tyrosine kinase activity, phosphatidylinositol 3-kinase binding, growth factor binding, myosin heavy chain binding, protein heterodimerization activity <more data available...>
ITGB6	Protein	integrin, beta 6	103	Homo sapiens, Mus musculus, Rattus norvegicus	P18564, C9JA97, B4E2B8, E9PEE8, Q9Z0T9, Q6AYF4, B2R9W5, Q0VA95, Q16500, Q53RG5 <more data available...>	integrin beta-6, 2210409C20Rik, 4831415H04Rik, RP23-68H20.1, RIKEN cDNA 2210409C20 gene, OTTHUMP00000205128, OTTHUMP00000207333, OTTMUSP00000013748, OTTMUSP00000013749, OTTMUSP00000013750 <more data available...>	mhmoud, down reg, all T, all PPI, Neighbors of cell proliferation, Neighbors of apoptosis, Neighbors of Neoplasms, Neighbors of cell growth, Neighbors of cell migration, Neighbors of Cancer <more data available...>	membrane, integral component of membrane, integrin complex, external side of plasma membrane, receptor complex, plasma membrane	multicellular organismal development, cell adhesion, integrin-mediated signaling pathway, cell-matrix adhesion, extracellular matrix organization, inflammatory response, modulation by virus of host morphology or physiology	virus receptor activity, receptor activity, integrin binding
TGFBR2	Protein	transforming growth factor, beta receptor II (70/80kDa)	938	Homo sapiens, Mus musculus, Rattus norvegicus	D2JYI1, P37173, A3QNQ0, Q543C0, Q62312, Q8BQS9, Q3UG22, P38438, Q63947, B4DTV5 <more data available...>	AAT3, FAA3, MFS2, RIIC, LDS1B, LDS2B, TAAD2, TGFR-2, TGFbeta-RII, TGF-beta receptor type-2 <more data available...>	Cell Cycle, Prostate Cancer Overview, Metastatic Colorectal Cancer Overview, Proteins Involved in Pathogenesis of T-cell Acute Lymphoblastic Leukemia, Chronic Myeloid Leukemia Overview, Hodgkin Lymphoma Overview, Diffuse Large-B-cell Lymphoma Overview, Proteins Involved in Pathogenesis of Prostate Cancer, Activation of Immunoglobulin Class-Switch Recombination, Regulatory T-cell Differentiation <…	membrane, membrane raft, integral component of membrane, external side of plasma membrane, integral component of plasma membrane, transforming growth factor beta receptor homodimeric complex, caveola, receptor complex, cell surface, plasma membrane <more data available...>	embryo implantation, positive regulation of B cell tolerance induction, positive regulation of T cell tolerance induction, positive regulation of tolerance induction to self antigen, embryonic hemopoiesis, positive regulation of NK T cell differentiation, myeloid dendritic cell differentiation, patterning of blood vessels, negative regulation of cardiac muscle cell proliferation, embryo developme…	receptor signaling protein serine-threonine kinase activity, transmembrane receptor protein serine-threonine kinase activity, transforming growth factor beta-activated receptor activity, transforming growth factor beta receptor activity, type II, transferase activity, transferase activity, transferring phosphorus-containing groups, kinase activity, protein kinase activity, protein serine-threonin…
MTF1	Protein	metal-regulatory transcription factor 1	190	Homo sapiens, Mus musculus, Rattus norvegicus	Q14872, Q07243, Q8BSY2, D3ZBT4, B2RAK6, Q96CB1, Q9JJW8	ZRF, MTF-1, metal regulatory transcription factor 1, zinc regulatory factor, transcription factor MTF-1, MRE-binding transcription factor, MRE-binding transcription factor-1, metal-responsive transcription factor 1, Thyls, RP23-168M5.2 <more data available...>	all mirna from neiighbor from, down reg, all T, all PPI, PPI with vit D and Rec, Neighbors of cell proliferation, Neighbors of apoptosis, Neighbors of mitosis, Neighbors of Neoplasms, Neighbors of embryonal development <more data available...>	nucleolus, nucleus	response to metal ion, response to cadmium ion, response to oxidative stress, positive regulation of transcription, DNA-templated, positive regulation of transcription from RNA polymerase II promoter, regulation of transcription, DNA-templated, regulation of transcription from RNA polymerase II promoter, transcription, DNA-templated	transcription coactivator activity, sequence-specific DNA binding transcription factor activity, histone acetyltransferase binding, nucleic acid binding, DNA binding, RNA polymerase II core promoter sequence-specific DNA binding, core promoter binding, metal ion binding
ZNF143	Protein	zinc finger protein 143	156	Homo sapiens, Mus musculus, Rattus norvegicus	P52747, O70230, Q5XIU2, A8K518, B4DLY5, O75559, Q8WUK9, Q8BGB0, Q8CEI6, Q8CI27	SBF, STAF, pHZ-1, zinc finger protein 143, hStaf, SPH-binding factor, transcriptional activator Staf, selenocysteine tRNA gene transcription-activating factor, Zfp79, KRAB14 <more data available...>	down reg, all T, all PPI, Neighbors of cell proliferation, Neighbors of apoptosis, Neighbors of Neoplasms, Neighbors of cell cycle, Neighbors of cell cycle regulation, Neighbors of meiosis, Neighbors of DNA repair <more data available...>	nucleoplasm, nucleus	regulation of transcription, DNA-templated, regulation of transcription from RNA polymerase III promoter, regulation of transcription from RNA polymerase II promoter, transcription, DNA-templated, transcription from RNA polymerase III promoter, transcription from RNA polymerase II promoter, gene expression	nucleic acid binding, DNA binding, metal ion binding
BTG2	Protein	BTG family, member 2	360	Homo sapiens, Mus musculus, Rattus norvegicus	P78543, Q04211, Q3TF68, P27049, Q3KR25, Q5VUT0	PC3, TIS21, protein BTG2, pheochromacytoma cell-3, B-cell translocation gene 2, NGF-inducible anti-proliferative protein PC3, nerve growth factor-inducible anti-proliferative, APRO1, AA959598, BTG family member 2 <more data available...>	hd DP, Neighbors of cell proliferation, Neighbors of cell differentiation, Neighbors of apoptosis, Neighbors of Neoplasms, Neighbors of cell migration, Neighbors of Cancer, Neighbors of cell growth, Neighbors of Neoplasm Metastasis, Neighbors of cell death <more data available...>		DNA repair, anterior-posterior pattern specification, associative learning, dentate gyrus development, skeletal muscle cell differentiation, central nervous system neuron development, neuron differentiation, neuron projection development, negative regulation of apoptotic process, negative regulation of neuron apoptotic process <more data available...>	RNA polymerase II core promoter proximal region sequence-specific DNA binding transcription factor activity involved in positive regulation of transcription
BRIP1	Protein	BRCA1 interacting protein C-terminal helicase 1	78	Homo sapiens, Mus musculus, Rattus norvegicus	Q9BX63, Q5SXJ3, Q3MJE2, Q8NCI5, Q8BJQ8, Q8BKI6	OF, BACH1, FANCJ, Fanconi anemia group J protein, ATP-dependent RNA helicase BRIP1, BRCA1/BRCA2-associated helicase 1, BRCA1-associated C-terminal helicase 1, BRCA1-binding helicase-like protein BACH1, FACJ, 3110009N10Rik <more data available...>	Hereditary Breast and Ovarian Cancer Syndrome, ESR1/ERBB-positive Luminal Breast Cancer, Basal Breast Cancer, Block of DNA Repair and Chromatin Remodeling in Pancreatic Cancer, down reg, all T, all PPI, PPI with vit D and Rec, Neighbors of apoptosis, Neighbors of Neoplasms <more data available...>	nuclear membrane, cytoplasm, nucleus	small molecule metabolic process, DNA repair, double-strand break repair, DNA damage checkpoint, cellular response to vitamin, negative regulation of cell proliferation, cellular response to DNA damage stimulus, regulation of transcription from RNA polymerase II promoter, nucleobase-containing compound metabolic process	ATP-dependent helicase activity, ATP-dependent DNA helicase activity, hydrolase activity, hydrolase activity, acting on acid anhydrides, hydrolase activity, acting on acid anhydrides, in phosphorus-containing anhydrides, helicase activity, nucleotide binding, ATP binding, nucleic acid binding, DNA binding <more data available...>
RAD18	Protein	RAD18 homolog (S. cerevisiae)	144	Homo sapiens, Mus musculus, Rattus norvegicus	Q9NS91, E9Q392, Q8CDH2, Q8CED3, Q9QXK2, A0JPN0, Q58F55, Q9NRT6, Q9CZB8	RNF73, E3 ubiquitin-protein ligase RAD18, hHR18, hRAD18, RING finger protein 73, RAD18, S. cerevisiae, homolog, postreplication repair protein RAD18, postreplication repair protein hRAD18p, Rad18sc, 2810024C04Rik <more data available...>	down reg, all T, all PPI, PPI with vit D and Rec, Neighbors of cell proliferation, Neighbors of apoptosis, Neighbors of mitosis, Neighbors of cell cycle, Neighbors of Cancer, Neighbors of meiosis <more data available...>	replication fork, chromatin, XY body, nucleus	spermatogenesis, DNA repair, cellular response to DNA damage stimulus, response to UV, negative regulation of DNA recombination, protein ubiquitination	ligase activity, ubiquitin protein ligase binding, polyubiquitin binding, nucleic acid binding, DNA binding, damaged DNA binding, Y-form DNA binding, metal ion binding, zinc ion binding
DDB2	Protein	damage-specific DNA binding protein 2, 48kDa	160	Homo sapiens, Mus musculus, Rattus norvegicus	Q92466, Q99J79, D3ZR08, B2R875, Q76E54, Q76E55, Q76E56, Q76E57	DDBB, UV-DDB2, DNA damage-binding protein 2, UV-DDB 2, DDB p48 subunit, UV-damaged DNA-binding protein 2, damage-specific DNA-binding protein 2, xeroderma pigmentosum group E protein, 2610043A19Rik, RP23-20F9.8 <more data available...>	up, all T, all PPI, PPI with vit D and Rec, Neighbors of cell proliferation, Neighbors of apoptosis, Neighbors of mitosis, Neighbors of Neoplasms, Neighbors of cell cycle, Neighbors of cell growth <more data available...>	nucleoplasm, protein complex, nucleus	DNA repair, nucleotide-excision repair, pyrimidine dimer repair, nucleotide-excision repair, DNA damage removal, cellular response to DNA damage stimulus, response to UV, protein polyubiquitination, protein autoubiquitination	ubiquitin-protein ligase activity, DNA binding, damaged DNA binding
BRCA2	Protein	breast cancer 2, early onset	527	Homo sapiens, Mus musculus, Rattus norvegicus	P51587, P97929, Q66MH4, O35923, F8VPU5, O35922, P97383, O00183, O15008, Q13879 <more data available...>	FAD, FACD, FAD1, GLM3, BRCC2, FANCB, FANCD, PNCA2, FANCD1, BROVCA2 <more data available...>	Double Strand DNA Homologous Repair, Hereditary Breast and Ovarian Cancer Syndrome, ESR1/ERBB-positive Luminal Breast Cancer, Basal Breast Cancer, High-grade Serous Ovarian Carcinoma, Proteins Involved in Pathogenesis of High-grade Serous Ovarian Carcinoma, Ovarian Cancer Overview, Proteins Involved in Pathogenesis of Prostate Cancer, Cancer Overview, Proteins Involved in Pathogenesis of Glioblas…	nucleoplasm, nucleolus, centrosome, protein complex, BRCA2-MAGE-D1 complex, intracellular, cytoplasm, secretory granule, nucleus	male meiosis I, homologous chromosome orientation involved in meiotic metaphase I plate congression, oocyte maturation, spermatogenesis, female gonad development, hemopoiesis, cell proliferation, DNA repair, nucleotide-excision repair, double-strand break repair <more data available...>	histone acetyltransferase activity, H4 histone acetyltransferase activity, H3 histone acetyltransferase activity, protease binding, gamma-tubulin binding, DNA binding, single-stranded DNA binding
H2AFX	Protein	H2A histone family, member X	870	Homo sapiens, Mus musculus, Rattus norvegicus	P16104, P27661, D3ZXP3, Q4ZGJ7, Q6IAS5	H2AX, H2A.X, H2A/X, histone H2AX, H2AX histone, histone H2A.x, AW228881, Hist5-2ax, gammaH2ax, histone 5 protein 2ax <more data available...>	INO80 Chromatin Remodeling, TRRAP/TIP60 Chromatin Remodeling, Histone Phosphorylation, Cell Cycle, Double Strand DNA Homologous Repair, Double Strand DNA Non-Homologous Repair, Immunoglobulin Class-Switch Recombination via Alternative End-Joining, Immunoglobulin Class-Switch Recombination via Classical Non-Homologous End-Joining, Neighbors of H2AFX, HeimCTL suppl data 4 <more data available...>	nucleoplasm, condensed nuclear chromosome, nuclear chromatin, replication fork, site of double-strand break, chromosome, telomeric region, chromatin, nucleosome, chromosome, XY body <more data available...>	meiotic nuclear division, spermatogenesis, DNA repair, positive regulation of DNA repair, double-strand break repair, double-strand break repair via homologous recombination, cell cycle, DNA damage checkpoint, cellular response to DNA damage stimulus, response to ionizing radiation <more data available...>	histone binding, enzyme binding, protein heterodimerization activity, DNA binding, damaged DNA binding
CENPF	Protein	centromere protein F, 350/400kDa	147	Homo sapiens, Mus musculus, Rattus norvegicus	P49454, E9Q3P4, Q13171, Q13246, Q5VVM7	CENF, hcp-1, PRO1779, RP11-262H5.1, centromere protein F, mitosin, AH antigen, kinetochore protein CENPF, CENP-F kinetochore protein, cell-cycle-dependent 350K nuclear protein <more data available...>	Kinetochore Assembly, down reg, all T, all PPI, Neighbors of cell proliferation, Neighbors of apoptosis, Neighbors of mitosis, Neighbors of Neoplasms, Neighbors of cell cycle, Neighbors of cell growth <more data available...>	nuclear envelope, nuclear matrix, chromosome, centromeric region, kinetochore, condensed chromosome outer kinetochore, chromatin, spindle pole, spindle, midbody, cytoplasm <more data available...>	cell proliferation, muscle organ development, regulation of striated muscle tissue development, cell differentiation, chromosome segregation, mitosis, mitotic spindle assembly checkpoint, mitotic G2 phase, mitotic M phase, regulation of G2-M transition of mitotic cell cycle <more data available...>	chromatin binding, dynein binding, protein C-terminus binding, transcription factor binding, protein homodimerization activity
HSPA8	Protein	heat shock 70kDa protein 8	884	Homo sapiens, Mus musculus, Rattus norvegicus	P11142, Q53HF2, P63017, P63018, P08109, P12225, Q4FZY7, Q62373, Q62374, Q62375 <more data available...>	LAP1, HSC54, HSC70, HSC71, HSP71, HSP73, NIP71, HEL-33, HSPA10, HEL-S-72p <more data available...>	Transcytosis, Protein Folding, Macrophage Function in Crohn's Disease, Class II Mutations Cause CFTR Misfolding and Degradation in Cystic Fibrosis, ADORA1/2A -> exocytosis, Neighbors of cell migration, Neighbors of cell proliferation, Neighbors of Neoplasm Metastasis, Neighbors of apoptosis, Neighbors of cell differentiation <more data available...>	clathrin-sculpted gamma-aminobutyric acid transport vesicle membrane, spliceosomal complex, nucleolus, ribonucleoprotein complex, protein complex, Prp19 complex, intracellular, plasma membrane, cytoplasm, cytosol <more data available...>	ATP catabolic process, axon guidance, regulation of cell cycle, synaptic transmission, neurotransmitter secretion, post-Golgi vesicle-mediated transport, response to stress, response to unfolded protein, negative regulation of transcription, DNA-templated, regulation of transcription, DNA-templated <more data available...>	ATPase activity, coupled, unfolded protein binding, receptor binding, nucleotide binding, ATP binding, ADP binding
STARD4	Protein	StAR-related lipid transfer (START) domain containing 4	40	Homo sapiens, Mus musculus, Rattus norvegicus	Q96DR4, Q86TN9, Q80SX0, Q99JV5, D3Z9I9	stAR-related lipid transfer protein 4, START domain-containing protein 4, START domain containing 4 sterol-regulated, START domain containing 4, sterol regulated, AA517649, AW324468, 4632419C16Rik, 9030213J02Rik, RIKEN cDNA 4632419C16 gene, StAR-related lipid transfer (START) domain containing IV <more data available...>	down reg, all T, all PPI, Neighbors of cell differentiation, Neighbors of oxidative stress, Neighbors of Atherosclerosis, relation 2 T	mitochondrion	lipid transport, transport	lipid binding, cholesterol binding
ANXA2	Protein	annexin A2	734	Homo sapiens, Mus musculus, Rattus norvegicus	P07355, P07356, Q542G9, Q07936, Q567R4, Q6N0B3, Q8TBV2, Q96DD5, Q9UDH8	P36, ANX2, LIP2, LPC2, CAL1H, LPC2D, ANX2L4, PAP-IV, annexin A2, annexin-2 <more data available...>	CFTR-Related Ion-Channel Dysfunction in Cystic Fibrosis Airway Epithelium (Class III Mutations), ADRA2C/ADRB2 -> synaptic endocytosis, GFs/TNF -> ion channels, Neighbors of nerve cell differentiation, Neighbors of protein ubiquitination, Neighbors of Injuries, Neighbors of proteolysis, Neighbors of cell migration, Neighbors of cytoskeleton organization and biogenesis, Neighbors of cell differenti…	extracellular matrix, membrane, cell junction, extracellular region, extrinsic component of plasma membrane, stress fiber, protein complex, myelin sheath adaxonal region, midbody, Schmidt-Lanterman incisure <more data available...>	fibrinolysis, regulation of fibrinolysis, body fluid secretion, angiogenesis, positive regulation of vesicle fusion, collagen fibril organization, positive regulation of fibroblast proliferation, protein targeting to plasma membrane, cellular response to acid, positive regulation of protein phosphorylation <more data available...>	phospholipase inhibitor activity, cytoskeletal protein binding, actin filament binding, Rab GTPase binding, calcium-dependent phospholipid binding, phosphatidylinositol-4,5-bisphosphate binding, calcium ion binding
ANLN	Protein	anillin, actin binding protein	93	Homo sapiens, Mus musculus, Rattus norvegicus	Q9NQW6, Q8K298, Q5CZ78, Q6NSK5, Q9H8Y4, Q9NVN9, Q9NVP0, Q8BL79, Q8BLB3, Q8K2N0 <more data available...>	scra, Scraps, actin-binding protein anillin, C78101, 1110037A17Rik, 2900037I21Rik, anillin, actin binding protein (scraps homolog, Drosophila), RGD1561367, anillin, actin binding protein, RIKEN cDNA 2900037I21 gene <more data available...>	cluster 2 (3hits) sham vs 1week, Neighbors of cytoskeleton organization and biogenesis, Neighbors of protein ubiquitination, Neighbors of Abnormalities, Neighbors of cell motility, Neighbors of cell division, Neighbors of mitosis, Neighbors of cell cycle, Neighbors of interphase, Neighbors of spindle assembly <more data available...>	actomyosin contractile ring, cytoplasm, cytoskeleton, actin cytoskeleton, nucleus	cell division, cell cycle, mitosis, regulation of exit from mitosis, mitotic cytokinesis, septin ring assembly	actin binding
AKAP12	Protein	A kinase (PRKA) anchor protein 12	295	Homo sapiens, Mus musculus, Rattus norvegicus	Q02952, Q86TJ9, B2RRE0, Q9WTQ5, Q5QD51, Q5QD49, Q5QD50, Q9Z1F7, O00310, O00498 <more data available...>	SSeCKS, AKAP250, A-kinase anchor protein 12, AKAP 250, kinase scaffold protein gravin, A-kinase anchor protein, 250kDa, Src-Suppressed C Kinase Substrate, myasthenia gravis autoantigen gravin, Srcs5, Tsga12 <more data available...>	Neighbors of cytoskeleton organization and biogenesis, Neighbors of actin organization, Neighbors of synaptic plasticity, Neighbors of apoptosis, Neighbors of mitosis, Neighbors of Nerve Degeneration, Neighbors of cell migration, Neighbors of long-term synaptic potentiation, Neighbors of cell proliferation, Neighbors of cell death <more data available...>	plasma membrane, cytoplasm, cell cortex, cytoskeleton	positive regulation of cAMP biosynthetic process, signal transduction, positive regulation of protein kinase A signaling, regulation of protein kinase C signaling, G-protein coupled receptor signaling pathway, protein targeting, phosphorylation	transferase activity, kinase activity, protein kinase A binding, adenylate cyclase binding, receptor signaling complex scaffold activity
EEF2K	Protein	eukaryotic elongation factor-2 kinase	195	Homo sapiens, Mus musculus, Rattus norvegicus	O00418, O08796, Q8BNP6, Q7TPC7, Q8CEC8, P70531, O09089	eEF-2K, HSU93850, eukaryotic elongation factor 2 kinase, eEF-2 kinase, elongation factor-2 kinase, eukaroytic elongation factor 2 kinase, calmodulin-dependent protein kinase III, calcium/calmodulin-dependent eukaryotic elongation factor 2 kinase, calcium/calmodulin-dependent eukaryotic elongation factor-2 kinase, C86191 <more data available...>	Translation, Proteins Involved in Pathogenesis of Glioblastoma, up, all T, all PPI, Neighbors of cell proliferation, Neighbors of apoptosis, Neighbors of Neoplasms, Neighbors of cell cycle, Neighbors of cell growth <more data available...>	cytoplasm, cytosol	insulin receptor signaling pathway, regulation of protein autophosphorylation, protein phosphorylation, protein autophosphorylation, translational elongation, phosphorylation	transferase activity, transferase activity, transferring phosphorus-containing groups, kinase activity, protein kinase activity, protein serine-threonine kinase activity, elongation factor-2 kinase activity, translation factor activity, nucleic acid binding, calmodulin binding, nucleotide binding, ATP binding <more data available...>
SERP1	Protein	stress-associated endoplasmic reticulum protein 1	143	Homo sapiens, Mus musculus, Rattus norvegicus	Q9Y6X1, Q9Z1W5, Q9R2C1, D3DNI6, Q794E7, Q3TMC9	RAMP4, stress-associated endoplasmic reticulum protein 1, ribosome-attached membrane protein 4, ribosome associated membrane protein 4, D3Ucla1, OTTHUMP00000216427, ribosome associated membrane protein IV, stress-associated endoplasmic reticulum protein I, SERP1, SERP I <more data available...>	Proteins Involved in Pathogenesis of Atherosclerosis, hd DP, Neighbors of cell proliferation, Neighbors of apoptosis, Neighbors of Neoplasms, Neighbors of cell migration, Neighbors of Inflammation, Neighbors of cell adhesion, Neighbors of vascularization, Neighbors of inflammatory response <more data available...>	membrane, integral component of membrane, endoplasmic reticulum membrane, cytoplasmic microtubule, ribosome, endoplasmic reticulum	glucose metabolic process, protein glycosylation, post-embryonic development, positive regulation of organ growth, multicellular organismal aging, skeletal system development, muscle organ morphogenesis, endoplasmic reticulum unfolded protein response, activation of signaling protein activity involved in unfolded protein response, positive regulation of insulin secretion <more data available...>
LIMS1	Protein	LIM and senescent cell antigen-like domains 1	195	Homo sapiens, Mus musculus, Rattus norvegicus	P48059, Q9D7B2, Q99JW4, C0KUC5, B2RAJ4, B7Z483, B7Z7R3, B7Z907, Q53TE0, Q9BS44 <more data available...>	PINCH, PINCH1, PINCH-1, LIM and senescent cell antigen-like-containing domain protein 1, renal carcinoma antigen NY-REN-48, particularly interesting new Cys-His protein 1, Lims1l, AI507642, AU021743, AW551584 <more data available...>	Focal Junction Assembly, Proteins Involved in Pathogenesis of Glioma, Neighbors of cell proliferation, Neighbors of apoptosis, Neighbors of cell cycle, Neighbors of Neoplasms, Neighbors of cell cycle progression, Neighbors of cell survival, Neighbors of cell differentiation, Neighbors of cell migration <more data available...>	membrane, cell junction, protein complex, plasma membrane, cytosol, perinuclear region of cytoplasm, focal adhesion	chordate embryonic development, cell aging, establishment or maintenance of cell polarity, positive regulation of integrin-mediated signaling pathway, cell-cell adhesion, cell-matrix adhesion, cell-cell junction organization, cell junction assembly, cellular response to transforming growth factor beta stimulus, negative regulation of transcription, DNA-templated <more data available...>	protein domain specific binding, metal ion binding, zinc ion binding
TTK	Protein	TTK protein kinase	258	Homo sapiens, Mus musculus, Rattus norvegicus	P33981, Q8BY97, Q8BX21, P35761, D4A4S7, A8K8U5, B2RDW2, E1P543, Q15272, Q5TCS0 <more data available...>	ESK, PYT, CT96, MPH1, MPS1, MPS1L1, RP3-357D13.2, dual specificity protein kinase TTK, cancer/testis antigen 96, monopolar spindle 1-like 1 <more data available...>	Cell Cycle, Centriole Duplication and Separation, Kinetochore Assembly, all mirna from neiighbor from, down reg, all T, all PPI, PPI with vit D and Rec, Neighbors of cell proliferation, Neighbors of apoptosis <more data available...>	spindle	mitotic spindle assembly checkpoint, spindle organization, mitotic spindle organization, positive regulation of pathway-restricted SMAD protein phosphorylation, positive regulation of cell proliferation, protein phosphorylation, peptidyl-tyrosine phosphorylation, phosphorylation	transferase activity, transferase activity, transferring phosphorus-containing groups, kinase activity, protein kinase activity, protein tyrosine kinase activity, protein serine-threonine-tyrosine kinase activity, protein serine-threonine kinase activity, nucleotide binding, ATP binding
PDGFC	Protein	platelet derived growth factor C	222	Homo sapiens, Mus musculus, Rattus norvegicus	Q9NRA1, Q8CI19, Q9EQX6, Q99JM4, Q9JHV8, Q9QY71, Q8K429, B4DU34, B9EGR8, Q4W5M9 <more data available...>	SCDGF, FALLOTEIN, UNQ174/PRO200, platelet-derived growth factor C, PDGF-C, VEGF-E, spinal cord-derived growth factor, secretory growth factor-like protein, AI647969, 1110064L01Rik <more data available...>	Clear Cell Ovarian Carcinoma, Ovarian Cancer Overview, Proteins Involved in Pathogenesis of Glioblastoma, Proteins Involved in Pathogenesis of Medulloblastoma, Growth Factor Signaling in Hepatocellular Carcinoma, Proteins Involved in Pathogenesis of Hepatocellular Carcinoma, Hepatocellular Carcinoma Overview, Vascularization in Hepatocellular Carcinoma, Model Autocrine Cytokine/Chemokine Loops in…	membrane, extracellular region, Golgi membrane, endoplasmic reticulum lumen, cell surface, cytoplasm, nucleus, extracellular space	multicellular organismal development, central nervous system development, organ morphogenesis, positive regulation of cell division, activation of transmembrane receptor protein tyrosine kinase activity, platelet-derived growth factor receptor signaling pathway, positive regulation of cell proliferation, positive regulation of fibroblast proliferation, cellular response to amino acid stimulus, po…	growth factor activity, platelet-derived growth factor receptor binding, protein homodimerization activity
PDPK1	Protein	3-phosphoinositide dependent protein kinase-1	846	Homo sapiens, Mus musculus, Rattus norvegicus	O15530, E9PER6, Q6A1A2, Q3TRL2, Q3UGN6, Q3UHZ0, Q9Z2A0, O55173, A6H6U3, Q9R1D8 <more data available...>	PDK1, PDPK2, PRO0461, 3-phosphoinositide-dependent protein kinase 1, PkB kinase like gene 1, RP23-153H18.1, mPDK1, Pkb kinase, 3-phosphoinositide dependent protein kinase-1, protein kinase B kinase <more data available...>	Androgen Receptor to SGK1 Signaling in Prostate Cancer, Androgen Receptor to Akt Signaling in Prostate Cancer, Prostate Cancer Overview, Metastatic Colorectal Cancer Overview, Myostatin-IGF1 Crosstalk in Skeletal Muscles, IL6 in Insulin Resistance, Dystrophin Glycoprotein Complex Signaling in Duchenne Muscular Dystrophy, Ca2+ Overload in Duchenne Muscular Dystrophy, Duchenne Muscular Dystrophy Ov…	membrane, cell junction, nucleoplasm, plasma membrane, cytoplasm, cytosol, cytoplasmic membrane-bounded vesicle, nucleus, focal adhesion	negative regulation of toll-like receptor signaling pathway, T cell receptor signaling pathway, regulation of mast cell degranulation, innate immune response, Fc-epsilon receptor signaling pathway, T cell costimulation, blood coagulation, platelet activation, type B pancreatic cell development, regulation of endothelial cell migration <more data available...>	transferase activity, transferase activity, transferring phosphorus-containing groups, kinase activity, protein kinase activity, protein serine-threonine kinase activity, 3-phosphoinositide-dependent protein kinase activity, insulin receptor binding, protein kinase binding, nucleotide binding, ATP binding
DUSP1	Protein	dual specificity phosphatase 1	989	Homo sapiens, Mus musculus, Rattus norvegicus	B4DU40, P28562, P28563, Q3U8K3, Q63683, Q64623, Q548G6, D3DQL9, Q2V508	HVH1, MKP1, CL100, MKP-1, PTPN10, dual specificity protein phosphatase 1, MAP kinase phosphatase 1, protein-tyrosine phosphatase CL100, dual specificity protein phosphatase hVH1, serine/threonine specific protein phosphatase <more data available...>	Proteins Involved in Pathogenesis of Atherosclerosis, Proteins Involved in Pathogenesis of Pulmonary Hypertension, Proteins Involved in Pathogenesis of Glioma, Expression Targets of NF-kB, down reg, all T, all PPI, PPI with vit D and Rec, Neighbors of cell proliferation, Neighbors of apoptosis <more data available...>	nucleoplasm, nucleus	negative regulation of meiotic cell cycle, negative regulation of ERK1 and ERK2 cascade, inactivation of MAPK activity, endoderm formation, cell cycle, intracellular signal transduction, positive regulation of apoptotic process, negative regulation of apoptotic process, regulation of apoptotic process, response to organic substance <more data available...>	MAP kinase tyrosine-serine-threonine phosphatase activity, hydrolase activity, phosphatase activity, phosphoprotein phosphatase activity, protein tyrosine phosphatase activity, protein tyrosine-threonine phosphatase activity, protein tyrosine-serine-threonine phosphatase activity, non-membrane spanning protein tyrosine phosphatase activity
ECT2	Protein	epithelial cell transforming sequence 2 oncogene	123	Homo sapiens, Mus musculus	Q9H8V3, G5E9L8, Q07139, Q0MT80, Q2M269, Q6U836, Q9NSV8, Q9NVW9, Q3TZP2, Q5DTR8 <more data available...>	ARHGEF31, protein ECT2, epithelial cell-transforming sequence 2 oncogene, AI528536, mKIAA4037, MGC138291, OTTMUSP00000023514, OTTMUSP00000023513, OTTMUSP00000023512, KIAA4037 <more data available...>	Proteins Involved in Pathogenesis of Glioma, down reg, all T, all PPI, PPI with vit D and Rec, Neighbors of cell proliferation, Neighbors of apoptosis, Neighbors of mitosis, Neighbors of Neoplasms, Neighbors of cell migration <more data available...>	cell junction, centralspindlin complex, mitotic spindle, midbody, cytoplasm, cytosol, cytoskeleton, nucleus, cleavage furrow, cell-cell junction <more data available...>	positive regulation of Rho GTPase activity, positive regulation of Cdc42 GTPase activity, activation of Rho GTPase activity, activation of Rac GTPase activity, nervous system development, positive regulation of neuron differentiation, cell differentiation, cell morphogenesis, cell division, cell cycle <more data available...>	GTPase activator activity, guanyl-nucleotide exchange factor activity, Rho guanyl-nucleotide exchange factor activity, signal transducer activity, Rho GTPase binding, protein homodimerization activity
TNFAIP3	Protein	tumor necrosis factor, alpha-induced protein 3	160	Homo sapiens, Mus musculus	P21580, Q3TBB9, Q7TQD1, Q60769, Q3U968, B2R767, E1P588, Q2HIX9, Q5VXQ7, Q9NSR6	A20, OTUD7C, TNFA1P2, RP11-356I2.3, tumor necrosis factor alpha-induced protein 3, zinc finger protein A20, TNF alpha-induced protein 3, OTU domain-containing protein 7C, putative DNA-binding protein A20, tumor necrosis factor inducible protein A20 <more data available...>	Hodgkin Lymphoma Overview, Diffuse Large-B-cell Lymphoma, ABC Subtype, Diffuse Large-B-cell Lymphoma, PMBL Subtype, Diffuse Large-B-cell Lymphoma Overview, Follicular Lymphoma Overview, Mantle Cell Lymphoma Overview, PI3K/AKT/MTOR, NF-kB and BCR Signaling Deregulation in Mantle Cell Lymphoma, Mucosa-Associated Lymphoid Tissue (MALT) Lymphoma Overview, Splenic Marginal Zone Lymphoma Overview, down…	centrosome, cytoplasm, cytosol, lysosome, nucleus	metabolic process, B-1 B cell homeostasis, tolerance induction to lipopolysaccharide, marginal zone B cell differentiation, negative regulation of toll-like receptor 4 signaling pathway, negative regulation of toll-like receptor 2 signaling pathway, negative regulation of toll-like receptor 5 signaling pathway, negative regulation of toll-like receptor 3 signaling pathway, nucleotide-binding olig…	catalytic activity, hydrolase activity, ligase activity, peptidase activity, ubiquitin thiolesterase activity, ubiquitin-specific protease activity, cysteine-type peptidase activity, ubiquitin-protein ligase activity, protein self-association, kinase binding <more data available...>
JAG1	Protein	jagged 1	687	Homo sapiens, Mus musculus, Rattus norvegicus	P78504, Q99740, Q3UVN4, Q9QXX0, Q63722, P70640, A0AV43, O14902, O15122, Q15816	AGS, AHD, AWS, HJ1, CD339, JAGL1, protein jagged-1, Htu, Ozz, ABE2 <more data available...>	Notch Pathway in Multiple Myeloma Plasma Cells, Osteoclast Activation in Multiple Myeloma, Multiple Myeloma Overview, T-cell Acute Lymphoblastic Leukemia Overview, Hodgkin Lymphoma Overview, Reprogramming of Hodgkin and Reed-Sternberg Cells, Mantle Cell Lymphoma Overview, Breast Cancer Related to NOTCH1 Signaling Pathway, Proteins Involved in Pathogenesis of Breast Cancer Related to NOTCH Signali…	membrane, extracellular region, integral component of membrane, integral component of plasma membrane, plasma membrane, apical part of cell	hemopoiesis, positive regulation of myeloid cell differentiation, multicellular organismal development, nervous system development, angiogenesis, pulmonary artery morphogenesis, aorta morphogenesis, loop of Henle development, distal tubule development, organ morphogenesis <more data available...>	structural molecule activity, growth factor activity, Notch binding, calcium ion binding
MALT1	Protein	mucosa associated lymphoid tissue lymphoma translocation gene 1	217	Homo sapiens, Mus musculus, Rattus norvegicus	A8K5S1, Q9UDY8, Q2TBA3, D4A980, D4A7M2, Q2TBA2, Q811E3, Q8BFT0, Q8C7N9, Q9NTB7 <more data available...>	MLT, MLT1, IMD12, mucosa-associated lymphoid tissue lymphoma translocation protein 1, paracaspase, caspase-like protein, MALT associated translocation, MALT lymphoma-associated translocation, MALT-lymphoma associated translocation, A630046N12 <more data available...>	T-cell Acute Lymphoblastic Leukemia Overview, Diffuse Large-B-cell Lymphoma, ABC Subtype, Diffuse Large-B-cell Lymphoma Overview, Proteins Involved in Pathogenesis of Diffuse Large-B-cell Lymphoma, Mantle Cell Lymphoma Overview, PI3K/AKT/MTOR, NF-kB and BCR Signaling Deregulation in Mantle Cell Lymphoma, Proteins Involved in Pathogenesis of Marginal Zone Lymphoma, Mucosa-Associated Lymphoid Tissu…	nucleolus, protein complex, CBM complex, intracellular, plasma membrane, cytoplasm, cytosol, perinuclear region of cytoplasm, nucleus	B-1 B cell differentiation, T cell receptor signaling pathway, regulation of T cell receptor signaling pathway, positive regulation of T cell cytokine production, innate immune response, Fc-epsilon receptor signaling pathway, B cell activation, positive regulation of T cell activation, T cell proliferation, activation of NF-kappaB-inducing kinase activity <more data available...>	signal transducer activity, kinase activator activity, hydrolase activity, peptidase activity, cysteine-type endopeptidase activity, ubiquitin-protein ligase activity, protein self-association, protease binding
CTSD	Protein	cathepsin D	853	Homo sapiens, Mus musculus, Rattus norvegicus	P07339, P18242, Q3UCD9, Q6P6T6, P24268, Q6IB57	CPSD, CLN10, HEL-S-130P, cathepsin D, lysosomal aspartyl protease, lysosomal aspartyl peptidase, ceroid-lipofuscinosis, neuronal 10, epididymis secretory sperm binding protein Li 130P, CD, CatD <more data available...>	Proteins Involved in Pathogenesis of Alzheimer's Disease, Proteins Involved in Pathogenesis of Melanoma, Proteins Involved in Pathogenesis of Myocardial Ischemia, Neighbors of cell migration, Neighbors of Neoplasms, Neighbors of Injuries, Neighbors of cell proliferation, Neighbors of cell differentiation, Neighbors of Neoplasm Metastasis, Neighbors of apoptosis <more data available...>	extracellular matrix, extracellular region, lysosomal lumen, mitochondrion, lysosome, melanosome, extracellular space	antigen processing and presentation of exogenous peptide antigen via MHC class II, collagen catabolic process, autophagic vacuole assembly, epithelial tube branching involved in lung morphogenesis, cell death, extracellular matrix disassembly, extracellular matrix organization, autophagy, proteolysis	hydrolase activity, peptidase activity, endopeptidase activity, aspartic-type endopeptidase activity, peptide binding
KIAA0101	Protein	KIAA0101	69	Homo sapiens, Mus musculus, Rattus norvegicus	Q15004, H0YMA4, Q9CQX4, Q6RIA2, A6NNU5, A8K3Y3, G9G694, G9G696, Q4VAG2, Q9CZ17 <more data available...>	L5, PAF, OEATC, PAF15, OEATC1, p15PAF, NS5ATP9, OEATC-1, p15/PAF, p15(PAF) <more data available...>	Ko2, Neighbors of mitosis, Neighbors of cell cycle arrest, Neighbors of cell cycle progression, Neighbors of apoptosis, Neighbors of Neoplasms, Neighbors of cell cycle, Neighbors of cell proliferation, Neighbors of protein ubiquitination, Neighbors of cell growth <more data available...>	cytoplasm, perinuclear region of cytoplasm, nucleus	DNA repair, translesion synthesis, centrosome organization, regulation of cell cycle, cellular response to DNA damage stimulus, response to UV, DNA replication	chromatin binding
AKR1C1	Protein	aldo-keto reductase family 1, member C1	213	Homo sapiens, Mus musculus, Rattus norvegicus	Q04828, Q91WR5, Q6AYQ2, Q6P8V0, Q9CX32, P52896, Q5SR15, Q7M4N2, Q9UCX2	C9, DD1, DDH, DDH1, H-37, HBAB, MBAB, HAKRC, DD1/DD2, 2-ALPHA-HSD <more data available...>	Neighbors of apoptosis, Neighbors of cell proliferation, Neighbors of Neoplasms, Neighbors of cell cycle, Neighbors of oxidative stress, Neighbors of DNA repair, Neighbors of cell differentiation, Neighbors of Infection, Neighbors of Breast Cancer, Neighbors of drug resistance <more data available...>	cytoplasm, cytosol	lipid metabolic process, oxidation-reduction process, steroid biosynthetic process, steroid metabolic process, prostaglandin metabolic process, retinoid metabolic process, retinal metabolic process, bile acid metabolic process, progesterone metabolic process, daunorubicin metabolic process <more data available...>	oxidoreductase activity, trans-1,2-dihydrobenzene-1,2-diol dehydrogenase activity, phenanthrene 9,10-monooxygenase activity, ketosteroid monooxygenase activity, oxidoreductase activity, acting on NAD(P)H, quinone or similar compound as acceptor, aldo-keto reductase (NADP) activity, steroid dehydrogenase activity, acting on the CH-OH group of donors, NAD or NADP as acceptor, indanol dehydrogenase …
FGD4	Protein	FYVE, RhoGEF and PH domain containing 4	35	Homo sapiens, Mus musculus, Rattus norvegicus	Q96M96, F8W1R0, B7Z493, G3XA97, E9PJX4, Q91ZT5, O88387, A1L355, Q3UEB6, Q8BW60 <more data available...>	CMT4H, FRABP, ZFYVE6, FYVE, RhoGEF and PH domain-containing protein 4, FGD1 family, member 4, FGD1-related F-actin-binding protein, actin-filament binding protein frabin, zinc finger FYVE domain-containing protein 6, 9030023J02Rik, 9330209B17Rik <more data available...>	down reg, all T, all PPI, Neighbors of cell proliferation, Neighbors of cell migration, Neighbors of actin organization, Neighbors of cell motility, relation 2 T	cell projection, cytoplasm, Golgi apparatus, cytosol, cytoskeleton, actin cytoskeleton, ruffle, filopodium, lamellipodium	activation of JUN kinase activity, regulation of Cdc42 GTPase activity, regulation of cell shape, actin cytoskeleton organization, apoptotic signaling pathway, small GTPase mediated signal transduction, regulation of small GTPase mediated signal transduction, regulation of Rho protein signal transduction, neurotrophin TRK receptor signaling pathway, positive regulation of apoptotic process <more …	guanyl-nucleotide exchange factor activity, Rho guanyl-nucleotide exchange factor activity, actin filament binding, small GTPase binding, actin binding, metal ion binding
ITPKC	Protein	inositol-trisphosphate 3-kinase C	21	Homo sapiens, Mus musculus, Rattus norvegicus	Q96DU7, Q7TS72, Q80ZG2, Q9UE25, Q9Y475, Q3U384	IP3KC, IP3-3KC, inositol-trisphosphate 3-kinase C, IP3K C, IP3 3-kinase C, InsP 3 kinase C, insP 3-kinase C, inositol 1,4,5-trisphosphate 3-kinase C, 9130023N17Rik, IP3K-C <more data available...>	hd DP, Neighbors of Inflammation, Neighbors of immune response, Neighbors of T-cell activation, up, all T, all PPI, relation 2 T	cytoplasm, cytosol, nucleus	small molecule metabolic process, inositol phosphate metabolic process, phosphorylation	transferase activity, kinase activity, inositol-1,4,5-trisphosphate 3-kinase activity, calmodulin binding, nucleotide binding, ATP binding
TRIM33	Protein	tripartite motif containing 33	128	Homo sapiens, Mus musculus, Rattus norvegicus	B3KN30, Q9UPN9, E9QME5, Q99PP7, E9QP19, O95855, Q5TG72, Q5TG73, Q5TG74, Q9C017 <more data available...>	ECTO, PTC7, RFG7, TF1G, TIF1G, TIFGAMMA, TIF1GAMMA, E3 ubiquitin-protein ligase TRIM33, TIF1-gamma, protein Rfg7 <more data available...>	over expressed, Neighbors of protein ubiquitination, Neighbors of cell proliferation, Neighbors of cell growth, Neighbors of Neoplasms, Neighbors of mitotic spindle checkpoint, Neighbors of mitosis, Neighbors of cell invasion, Neighbors of Carcinoma, Non-Small-Cell Lung, Neighbors of cell differentiation <more data available...>	nucleoplasm, nucleolus, intracellular, intracellular membrane-bounded organelle, nucleus	negative regulation of BMP signaling pathway, regulation of transforming growth factor beta receptor signaling pathway, transforming growth factor beta receptor signaling pathway, negative regulation of transcription, DNA-templated, negative regulation of transcription from RNA polymerase II promoter, regulation of transcription, DNA-templated, transcription, DNA-templated, transcription initiati…	ligase activity, ubiquitin-protein ligase activity, co-SMAD binding, R-SMAD binding, DNA binding, metal ion binding, zinc ion binding
oxidative stress	Cell Process		2358			oxidant stresses, oxidative damage, attack of hydroxyl radical, oxidative stress, free radical damage, free radical-induced damage, hydroxyl radical attack, Oxidative Stresses, oxygen free radical-induced oxidative stress, oxygen radical damage <more data available...>	Dystrophin Glycoprotein Complex Signaling in Duchenne Muscular Dystrophy, Ca2+ Overload in Duchenne Muscular Dystrophy, Duchenne Muscular Dystrophy Overview, Alzheimer's Disease Overview, Ca2+ Toxicity in Alzheimer's Disease, Young Onset SNCA Induced Parkinson's Disease, Young Onset PARK7 and LRRK2 Induced Parkinson's Disease, Neurotoxin-Induced Parkinson's Disease, Susceptibility Genes for Crohn…
Inflammation	Disease		3075			inflammatory process, inflammatory syndrome, inflammatory condition, Inflammatory Reaction, Inflammations, Inflammation	Duchenne Muscular Dystrophy Overview, IL6 Promotes Inflammation, Graves Ophthalmopathy, Airway Epithelial Cell Dysfunction in Cystic Fibrosis (Overview), Myocardial Ischemia/Reperfusion Injury, ADRA1 -> prostaglandin generation, ADRA1A -> IL6 production, ADRB1 -> prostaglandin generation, NMDA receptors -> Ca2+/CREB activation/PGE2 synthesis, P2RY11/13/14 -> IL8/10 production <more data available…
cell cycle arrest	Cell Process		2064			cell cycle arrest	Neighbors of cell cycle arrest, breast related, Copy of 'breast related' extended, New Combined Pathway Hippo-contra 3_hit_48h vs Sham up, New Combined Pathway Hippo-contra 3_hit_1w vs Sham up, IGH6-1 part 1, Ko2 -1, group c, pathways of targets, relation 2 T <more data available...>
cell motility	Cell Process		2077			cell mobility, motility of the cell, mobility of the cell, cell motility, cellular motility, cell locomotion	Androgen Receptor to c-Met Signaling in Prostate Cancer, Type II Endometrial Cancer (Clear-cell Endometrial Cancer and Papillary Serous Endometrial Cancer), Endometrial Cancer Overview, MITF as a Regulator of Melanoma Cell Development, Dedifferentiation and Metastatic Progression of Melanoma, WNT Signaling in Melanoma, Melanoma Overview, Smooth Muscle Cell Dysfunction in Pulmonary Arterial Hypert…

## Sheet: Relation and  references 
Supplemental Table S3: Pathway Studios Protein List and Description (regulation)
Relation	Organ	Type	Sentence	TextRef	Connectivity	# of References	Owner	Found In Pathways	bindng
G6PD ---> oxidative stress	Liver {Organ urn:agi-ncimorgan:CL384198}, Kidney {Organ urn:agi-ncimorgan:C1278978}, Ovary {Organ urn:agi-ncimorgan:CL384202}, Heart {Organ urn:agi-ncimorgan:C1281570}, Islets of Langerhans {Organ urn:agi-ncimorgan:C0022131}, Left ventricular {Organ urn:agi-ncimorgan:C0225897}, Hippocampus {Organ urn:agi-ncimorgan:C0019564}, Ovarian Follicle {Organ urn:agi-ncimorgan:C1283799}, Foreskin {Organ urn…	Regulation	Glucose-6-phosphate dehydrogenase (G6PD) has an essential role in the defense against cellular oxidative injury., G6PD overexpression has been implicated in insulin resistance, hyperlipidemia, and increased oxidative stress in animals., In addition, G6PD gene knockdown rendered tumor cells more susceptible to diamide-induced oxidative stress., Although it is known that decreased G6PD functionalit…	info:pmid/23803679#abs:1, info:pmid/22083321#abs:2, info:pmid/19243250#abs:8, info:pmid/11788599#abs:3, info:pmid/11007790#abs:3, info:pmid/23572562#abs:2, info:pmid/17512457#abs:1, info:pmid/23105394#abs:1, info:pmid/19230846#abs:9, info:pmid/15956780#abs:11 <more data available...>	2	87		Neighbors of oxidative stress, relation 2 T
DUSP1 ---| Inflammation	Oral cavity {Organ urn:agi-ncimorgan:C1278910}, Bone and Bones {Organ urn:agi-ncimorgan:C0262950}, Lung {Organ urn:agi-ncimorgan:C1278908}, Bronchi {Organ urn:agi-ncimorgan:C0006255}, Ear {Organ urn:agi-ncimorgan:C0013443}, lung parenchyma {Organ urn:agi-ncimorgan:C1279455}, airway {Organ urn:agi-ncimorgan:C0458827}	Regulation	MKP-1 was regulated by innate recognition signals and its deficiency disrupted antimicrobial responses and promoted T cell-mediated inflammation., In severe combined immunodeficiency mice, lymphocyte deficiency, especially T cell deficiency, causes insufficient MKP-1 expression in macrophages, which can be responsible for the severe inflammation and bad prognosis of septic severe combined immunod…	info:pmid/21723158#abs:4, info:pmid/21956667#abs:10, info:pmid/22753499#cont:538, info:pmid/21208877#cont:255, info:pmid/24023646#cont:191, info:pmid/22197448#body:158, info:pmid/23849041#title:1, info:pmid/20353815#body:76, info:pmid/17208316#body:77, info:pmid/20093631#cont:317 <more data available...>	2	32		Neighbors of Inflammation, relation 2 T
ANXA2 ---| cell motility	Breast {Organ urn:agi-ncimorgan:C0006141}, Umbilical cord {Organ urn:agi-ncimorgan:C0041633}	Regulation	Annexin A2 neutralizing antibodies significantly inhibited OV-90 cell motility and invasion in vitro and in vivo using the chick chorioallantoic membrane assay., We identified a list of 25 proteins that were strongly detected in media of H-Ras MCF10A and focused on annexin II, which was shown to be involved in cell motility., RNAi-mediated depletion of ANXA2 expression impaired cell motility, To …	info:pmid/23945256#abs:8, info:pmid/24019232#abs:4, info:pmid/24289616#cont:146, info:pmid/23558678#cont:115, info:pmid/24239898#body:171, info:pmid/17322380#body:11, info:pmid/23935848#cont:353, info:pmid/15616195#body:198	2	8		Neighbors of cell motility, relation 2 T
BRCA2 ---| cell motility		Regulation	Complete recovery of BRCA2 to the levels of wild-type PNT1A cells (in BRCA2 #2 transfectants) was able to reduce cell proliferation by 70% after 72 hours ( P < 0.001) and cell motility by 63% ( P < 0.002).	info:doi/10.1016/j.ajpath.2011.01.050#body:103	2	1		Neighbors of cell motility, relation 2 T
JUN ---> Inflammation	Kidney Glomerulus {Organ urn:agi-ncimorgan:C0022663}, Kidney {Organ urn:agi-ncimorgan:C1278978}, Epidermis {Organ urn:agi-ncimorgan:C0014520}, Brain {Organ urn:agi-ncimorgan:C1269537}, Pancreas {Organ urn:agi-ncimorgan:C1278931}, Gastrointestinal tract {Organ urn:agi-ncimorgan:C0017189}, airway {Organ urn:agi-ncimorgan:C0458827}, Skin {Organ urn:agi-ncimorgan:C0684084}, Coronary artery	Regulation	Activation of c-Jun may be involved in the regulation of inflammation and/or fibrosis in human renal disease., Our findings suggest that ATF-3 and c-Jun may influence heritable variation in SLC11A1-dependent innate resistance to infection and inflammation both within and between populations., NOX-dependent oxidative activation of transcription factors such as NF-kB and c-jun leads to increased ex…	info:pmid/17891746#abs:10, info:pmid/23187734#abs:11, info:pmid/24264044#abs:7, info:pmid/19933155#title:1, info:pmid/21540289#cont:316, info:pmid/21298039#cont:481, info:pmid/16332992#body:280, info:pmid/23242724#cont:197, info:pmid/23110041#cont:184, info:pmid/22677613#body:91 <more data available...>	2	16		IL6 Promotes Inflammation, Neighbors of Inflammation, relation 2 T
CTSD ---> Inflammation	frontal cortex {Organ urn:agi-ncimorgan:C1281953}, Central Nervous System {Organ urn:agi-ncimorgan:C0927232}, Periodontium {Organ urn:agi-ncimorgan:C0031104}	Regulation	Recent studies have also shown that cathepsin D may be involved in inflammation., Studies using RNA interference have confirmed that cathepsin D has a role in the activation of inflammation ., More recently, it has been shown that cathepsin D can also activate pro-caspase 8, initiating neutrophil apoptosis during the resolution of inflammation ., Moreover, expression of the lysosomal cathepsin D …	info:pmid/19854241#body:82, info:pmid/23261460#body:11, info:pmid/20493920#body:60, info:pmid/23326599#cont:83, info:pmid/15081423#body:38	2	5		Neighbors of Inflammation, 4, ad1 yellow, relation 2 T
PDPK1 ---| cell cycle arrest		Regulation	B, effect of MPK38 on PDK1-mediated suppression of transforming growth factor-ß-induced cell cycle arrest., Restoration of PDK1 expression abrogated the induction of cell cycle arrest after BRAFV600E expression (Fig. 3e, f), which was paralleled by suppression of several senescence-associated biomarkers (Fig. 3a, g, h)., These results indicate that PDK1 inhibits TGF-ß-induced growth arrest and su…	info:pmid/22544756#cont:201, info:pmid/23685455#cont:178, info:pmid/17327236#body:383, info:pmid/22525724#body:209, info:doi/10.1016/j.bcp.2012.04.006#body:209	2	5		Neighbors of cell cycle arrest, relation 2 T
HSPA8 ---> Inflammation		Regulation	Although the functions of Hsc70 are not very clear, some data indicate that Hsc70 is involved multiple cellular events, such as viral infections , stress and autoimmune inflammation ., In a transgenic mouse model, damage of beta cells leads to the over-expression of HSC70 and an increased incidence of diabetes suggesting HSC70 may stimulate inflammation and autoimmune responses upon cell death ( …	info:pmid/21565169#body:85, info:pmid/22960394#body:570	2	2		Neighbors of Inflammation, relation 2 T
JUN --+> oxidative stress	Lung {Organ urn:agi-ncimorgan:C1278908}, Liver {Organ urn:agi-ncimorgan:CL384198}	Regulation	Thus, oxidative stress in oligodendrocytes leads to the onset of programmed cell death, involving the transcriptional activation of the immediate-early genes c-fos and c-jun., However, the suppression of H(2)O(2)-induced oxidative stress by either JNK inhibitor or c-Jun specific antisense transfection was temporary in the cells exposed to glucose oxidase but not to a bolus H(2)O(2)., We provide e…	info:pmid/9770364#abs:11, info:pmid/19937141#abs:7, info:pmid/18365879#abs:8, info:pmid/11134000#body:35, info:pmid/19604147#cont:183, info:pmid/14614956#body:349, info:pmid/11137704#body:164, info:pmid/17335952#body:7, info:pmid/22659305#body:9, info:pmid/10713735#body:103 <more data available...>	2	13		Metals and Amyloid beta Toxicity, Neighbors of oxidative stress, relation 2 T
TNFAIP3 ---| Inflammation	Intestines {Organ urn:agi-ncimorgan:C0021853}, Joints {Organ urn:agi-ncimorgan:C0392905}, Lung {Organ urn:agi-ncimorgan:C1278908}	Regulation	The TNF alpha-induced protein 3 (TNFAIP3) is an ubiquitin-modifying enzyme and an essential negative regulator of inflammation., Reversion was particularly evident for 7 genes: SOCS2, TNFAIP3, NR4A2, CXCR4, POLR2J, FAM49B, and STAG3L1, most of which encode negative regulators of inflammation., These results indicate that TNFAIP3 expression in Intestinal epithelial cells prevents colitis involving…	info:pmid/20483768#abs:1, info:pmid/21403007#abs:2, info:pmid/22595989#abs:9, info:pmid/23039325#cont:815, info:pmid/19748832#body:12, info:pmid/20933377#body:29, info:pmid/19643760#cont:173, info:pmid/21263385#cont:486, info:pmid/20430301#body:70, info:pmid/19366996#body:121 <more data available...>	2	19		Neighbors of Inflammation, relation 2 T
CEBPD --+> cell cycle arrest		Regulation	CCAAT enhancer binding protein delta is a transcription factor known to induce G 0/G 1 cell cycle arrest in mammary gland epithelial cells, an effect which appears to be specific to epithelial cells ( ).	info:pmid/19840786#body:41	2	1		Neighbors of cell cycle arrest, relation 2 T
LIMS1 ---> cell motility	Fingers {Organ urn:agi-ncimorgan:C0016129}, Blastocyst {Organ urn:agi-ncimorgan:C1281743}	Regulation	Inhibition of the PINCH-ILK interaction, either by overexpression of a PINCH N-terminal fragment containing the ILK-binding LIM1 domain or by overexpression of an ILK N-terminal fragment containing the PINCH-binding ankyrin domain, retarded cell spreading, and reduced cell motility., Overexpression of the N-terminus of PINCH (LIM1 domain) or the N-terminus of ILK (ankyrin repeat) results in retar…	info:pmid/11694512#abs:7, info:pmid/12651156#body:19, info:pmid/15721255#body:82, info:pmid/17026740#body:363, info:pmid/19652092#body:71	2	5		Neighbors of cell motility, relation 2 T
BTG2 --+> cell cycle arrest	Breast {Organ urn:agi-ncimorgan:C0006141}, Lymph Nodes {Organ urn:agi-ncimorgan:C0154054}, Pancreas {Organ urn:agi-ncimorgan:C1278931}	Regulation	Moreover, during myogenic differentiation of C2C12 cells, we showed an increase of TIS21/BTG2/PC3 expression and a decrease in cyclin D1 levels. siRNA downregulation of TIS21/ BTG2/PC3 impaired myogenic differentiation by opposing cell cycle arrest., Interestingly, neuregulin was able to reverse BTG2-mediated cell cycle arrest (Supplementary Figure 3)., According to the literature, BTG2 is involv…	info:pmid/19263516#abs:7, info:pmid/21339742#cont:251, info:pmid/20553615#body:179, info:pmid/11377414#body:106, info:pmid/23876794#body:186, info:pmid/19728149#cont:193, info:pmid/24308156#cont:225, info:pmid/23639285#body:60, info:pmid/24440351#body:58, info:pmid/11042695#body:181	2	10		Neighbors of cell cycle arrest, relation 2 T
H2AFX ---> cell cycle arrest	Aortic valve {Organ urn:agi-ncimorgan:C0003501}, Lymphatic System {Organ urn:agi-ncimorgan:C0024235}	Regulation	The results establish a new role for H2AX in the p53/p21 pathway and indicate that H2AX is required for p21-induced cell cycle arrest after replication stalling., DNA damage, telomere length attrition, and induction of ?H2AX usually lead to cell cycle arrest., Furthermore, H2AX dephosphorylation turns off DNA damage signaling, thereby triggering exit from cell cycle arrest (Keogh et al., 2005)., …	info:pmid/19273588#abs:9, info:pmid/22355273#cont:205, info:pmid/16520385#body:259, info:pmid/23241403#cont:50, info:pmid/17307909#body:193, info:pmid/24411679#body:333, info:pmid/24211747#body:12, info:pmid/18638378#body:70, info:pmid/22948226#cont:54, info:pmid/18005708#body:165 <more data available...>	2	14		Neighbors of cell cycle arrest, relation 2 T
HSPA8 ---| oxidative stress	Common iliac lymph node {Organ urn:agi-ncimorgan:C0229807}, Central Nervous System {Organ urn:agi-ncimorgan:C0927232}	Regulation	Conversely, we demonstrate that incubation with the heat shock cognate 70 (Hsc70) protein prior to oxidative insult can protect MNs from oxidative stress., Our results indicate that Hsc70 not only negatively modulates the activation of HRI in heme-deficienct rabbit reticulocyte lysate, but also in hemin-supplemented rabbit reticulocyte lysate in response to heat and oxidative stress., Northern-bl…	info:pmid/17918243#abs:6, info:pmid/9738893#abs:10, info:pmid/8615820#abs:6, info:pmid/20677910#title:1, info:pmid/21958194#title:1, info:pmid/21050049#cont:13, info:pmid/19272430#body:79, info:pmid/18511046#body:166	2	8		Neighbors of oxidative stress, clust 2-1, relation 2 T
CTSD --+> oxidative stress	Optic Disk {Organ urn:agi-ncimorgan:C0029127}	Regulation	In this study we suggest that CatD might activate autophagy to enhance cell survival under oxidative stress., Experiments using the 661W cell line suggested that calpain, cathepsin D, and caspases may be involved in photoreceptor cell degeneration during oxidative stress., Overexpression of CTSD induces or sensitizes HeLa and PC12 cells to apoptosis upon serum starvation18 and oxidative stress.19…	info:pmid/22542809#body:15, info:pmid/18348880#body:128, info:pmid/14739942#body:44	2	3		Neighbors of oxidative stress, ad1mirna red, ptn 'ad1 red', relation 2 T
ANXA2 ---> Inflammation	white matter {Organ urn:agi-ncimorgan:C0682708}	Regulation	We found that annexin II and Reg-2 remarkably reduced neuronal death, attenuated tissue damage and alleviated detrimental inflammation in vivo; meanwhile, a significant increase in white matter sparing and myelination area was observed., Moreover, ANXII plays an important role in the pathophysiological action of macrophages during the inflammatory process ., The annexin A2-S100A10 heterotetramer …	info:pmid/21430360#abs:3, info:pmid/16386257#body:85, info:pmid/23519104#cont:654, info:pmid/18502476#body:14	2	4		Neighbors of Inflammation, grp2-1, lane2 2, relation 2 T
SERP1 ---> Inflammation	artery wall {Organ urn:agi-organ:artery%20wall}, blood vessel wall {Organ urn:agi-ncimorgan:C1180033}, Aorta {Organ urn:agi-ncimorgan:C1278934}	Regulation	It is well known from these studies that Serp-1 attenuates inflammation by blocking migration of monocytes into the artery wall., Selective changes in the reactive center loop of Serp-1 markedly altered the balance between inflammation, thrombosis, and healing in the vascular wall., To test these postulates, we assessed the role of PAI-1 and the uPA receptor in Serp-1-mediated inhibition of infla…	info:pmid/19052145#body:260, info:pmid/16407226#body:267, info:pmid/12637546#body:242, info:pmid/21683260#body:40	2	4		Neighbors of Inflammation, relation 2 T
TGFBR2 ---| cell motility	Lung {Organ urn:agi-ncimorgan:C1278908}	Regulation	However, Fc:TbetaRII increased apoptosis in primary tumors, while reducing tumor cell motility, intravasation, and lung metastases., Tumor cell motility and extravasation as well as matrix metalloproteinase activity were inhibited in the presence of Fc:TßRII., This result indicates that FZD7, MAP3K1, PAK2, TGF-ßR2, RRAS2 or uPA each has a critical role in cell mobility and is under the regulation…	info:pmid/12070302#abs:5, info:pmid/16322320#body:237, info:pmid/22109528#cont:348, info:pmid/22018778#body:112, info:pmid/20307969#body:66, info:doi/10.1016/j.ccr.2007.08.020#body:33	2	6		Neighbors of cell motility, relation 2 T
JUN ---> cell cycle arrest	Breast {Organ urn:agi-ncimorgan:C0006141}, Skin {Organ urn:agi-ncimorgan:C0684084}	Regulation	The c-JUN peptide induces apoptosis by cell cycle arrest., This study identified a novel mechanism how Jun proteins and EGFR signaling control cellular proliferation, cell-cycle arrest/senescence and the response to stress., Furthermore, c-jun is required for the recovery from UV-induced cell cycle arrest , and c- myc -/- cells also recover very poorly from UV irradiation (M.W., unpublished data)…	info:pmid/12832416#body:213, info:pmid/20300111#cont:347, info:pmid/12408820#body:190, info:pmid/21496227#cont:218, info:pmid/19962721#body:25, info:pmid/17301228#body:138, info:pmid/22933572#cont:68, info:pmid/9837920#body:39	2	8		Neighbors of cell cycle arrest, relation 2 T
ITGB6 --+> Inflammation	Alveolus {Organ urn:agi-ncimorgan:C1515933}, airway {Organ urn:agi-ncimorgan:C0458827}	Regulation	In addition, the absence of the beta6 integrin subunit reduced IL-1beta-induced neutrophil and macrophage infiltration into the alveolar spaces. beta6 integrin subunit deficiency suppressed inflammation and goblet cell hyperplasia in the airways and alleviated airway remodeling in IL-1beta-expressing mice., Recent data (52, 53), however, suggest that TGF-ß1 inhibition, using integrin ß6-null mice…	info:pmid/19717813#abs:8, info:pmid/11781349#body:286, info:pmid/20494738#body:57	2	3		Neighbors of Inflammation, relation 2 T
JAG1 ---> Inflammation	blood vessel wall {Organ urn:agi-ncimorgan:C1180033}, Bone Marrow {Organ urn:agi-ncimorgan:C0005953}	Regulation	Soluble Jagged1 ligand inhibits T-cell activation and abrogates vessel wall inflammation., Following upregulation of Jagged1 on DCs by antigen and Lipopolysaccaride, Jagged1-Notch signaling plays an important role in Th2 differentiation and in development of allergen-induced airway hyperresponsiveness and inflammation.	info:pmid/21220737#cont:281, info:doi/10.1016/j.jaci.2008.12.575#body:8	2	2		Neighbors of Inflammation, relation 2 T
ATP1B1 ---| cell motility		Regulation	However, until now, the mechanism by which Na,K-beta reduces cell motility remained elusive., Recent results suggested that overexpression of the Na,K-ATPase ß1 subunit in MSV-Madin-Darby canine kidney cells suppressed cell motility due to the signaling mechanism involving both subunits of the Na,K-ATPase, annexin-II, and phosphatidylinositol 3-kinase (21)., Repletion of both E-cadherin and Na,K-…	info:pmid/15616195#abs:5, info:pmid/17052981#body:77, info:pmid/14699059#body:80, info:doi/10.1016/j.mce.2011.12.020#body:185	2	4		Neighbors of cell motility, relation 2 T
BRCA2 ---> cell cycle arrest	Breast {Organ urn:agi-ncimorgan:C0006141}	Regulation	We show here that BRCA1 or BRCA2 dysfunction unexpectedly and profoundly sensitizes cells to the inhibition of PARP enzymatic activity, resulting in chromosomal instability, cell cycle arrest and subsequent apoptosis., Additionally, it has been recently shown that BRCA1 and BRCA2 dysfunction sensitises cells to the inhibition of PARP enzymatic activity, resulting in chromosomal instability, cell …	info:pmid/15829967#abs:3, info:pmid/19013786#body:130, info:pmid/15933754#body:131, info:pmid/17531338#body:135	2	4		Neighbors of cell cycle arrest, relation 2 T
AKAP12 --+> cell cycle arrest		Regulation	Notably, our data clearly showed that AKAP12 induces cell cycle arrest and subsequent apoptosis in HT1080 cells.	info:pmid/17442483#body:91	2	1		Neighbors of cell cycle arrest, relation 2 T
MTF1 ---> oxidative stress	Peripheral Nervous System {Organ urn:agi-ncimorgan:C0206417}, Liver {Organ urn:agi-ncimorgan:CL384198}, Fingers {Organ urn:agi-ncimorgan:C0016129}	Regulation	MTF-1, which is conserved from insects to mammals, is a key regulator of heavy metal homeostasis and detoxification and plays additional roles in other stress conditions, notably oxidative stress., This is underlined by our finding that both MTF-1 and SOD1 are involved in protection against metal-mediated damage and against oxidative stress., Regarding cancer, MTF-1 can be expected to have a bene…	info:pmid/21383066#abs:4, info:pmid/18775584#body:185, info:pmid/22289350#body:172, info:pmid/24462706#body:232, info:pmid/10601325#body:303, info:doi/10.1016/j.bbamcr.2012.01.005#body:172	2	6		Neighbors of oxidative stress, relation 2 T
ZNF143 ---| oxidative stress		Regulation	It is conceivable that the observed activities of SBF can also reduce the oxidative stress during anti-inflammatory process., Our data have revealed that in orchestra with the increased activity of GCLC and GSH synthesis, ZNF143 upregulates cellular glutathione peroxidase activity to protect cells from oxidative stress induced by mitochondrial dysfunction.	info:pmid/15763366#body:133, info:pmid/23152058#cont:314	2	2		Neighbors of oxidative stress, relation 2 T
CEBPD --+> Inflammation	Heart Atrium {Organ urn:agi-ncimorgan:C0018792}, retinal pigment epithelium {Organ urn:agi-ncimorgan:C0035322}, Kidney {Organ urn:agi-ncimorgan:C1278978}, Alveolus {Organ urn:agi-ncimorgan:C1515933}, Central Nervous System {Organ urn:agi-ncimorgan:C0927232}	Regulation	Suppression of inflammation and acute lung injury by Miz1 via repression of C/EBP-d., NF-IL6-beta and macrophage migration inhibitory factor are involved in inflammation ., Mechanistically, it is possible that this inflammatory cascade is induced by the up-regulation of CEBPD, which activates inflammation in atherosclerosis (23)., Interestingly, C/EBPd also modifies renal inflammation, as C/EBPd …	info:pmid/23525087#title:1, info:pmid/15982490#body:82, info:pmid/16081535#body:173, info:pmid/24247561#cont:42, info:pmid/23130672#cont:414, info:pmid/23177475#body:131, info:pmid/23575666#cont:1092, info:pmid/24155666#cont:468	2	8		Neighbors of Inflammation, relation 2 T
ECT2 ---| cell cycle arrest		Regulation	Finally, we generated multiple cell lines in which ECT2 is inducibly knocked down and found that ECT2 knockdown triggers cell cycle arrest in G1., Knockdown of ECT2 promotes cell cycle arrest, They also showed that knockdown of Ect2 triggered cell cycle arrest in G1 ( )., Paradoxically, Ect2 is overexpressed in some human tumors (Sano et al., 2006; Salhia et al., 2008; Zhang et al., 2008; Hirata …	info:pmid/16778203#abs:9, info:pmid/21124766#cont:108, info:pmid/22366651#body:80, info:pmid/19617897#body:35	2	4		Neighbors of cell cycle arrest, relation 2 T
TGFBR2 ---> Inflammation	airway {Organ urn:agi-ncimorgan:C0458827}, Prostate {Organ urn:agi-ncimorgan:C1278980}, Intestines {Organ urn:agi-ncimorgan:C0021853}	Regulation	TGFßRII deletion increases proliferation, local inflammation, and TGFß ligand elaboration; TGFßRII knockdown in airway epithelial cells increases migration and invasion., The study also suggests that a dysfunctional TGF beta RII augments androgen receptor expression and promotes inflammation in early stage tumor growth, thus conferring a significant contribution by TGF-beta to prostate cancer pro…	info:pmid/22399565#abs:7, info:pmid/19738062#abs:8, info:pmid/23921128#cont:43, info:pmid/22835460#body:65, info:pmid/24397824#cont:149, info:pmid/19766083#body:119, info:pmid/17521582#body:10, info:pmid/24074947#body:49, info:pmid/23941828#body:161, info:pmid/24012338#body:171	2	10		Neighbors of Inflammation, relation 2 T
JAG1 ---> cell cycle arrest	Mammary Gland {Organ urn:agi-ncimorgan:C0929301}	Regulation	In prostate cancer, a down-regulation of Jagged-1 led to cell-cycle arrest in S phase ., These data indicate that Jag-1 induces p27kip1 expression exclusively through Notch2 to promote cell cycle arrest.	info:pmid/18818107#body:105, info:pmid/23965337#cont:184	2	2		Neighbors of cell cycle arrest, relation 2 T
JUN --+> cell motility	Endometrium {Organ urn:agi-ncimorgan:C1550633}	Regulation	Our results suggest that Jun plays an important role in the potentiation of cell motility and invasion through multiple mechanisms., These studies demonstrated that c-jun deletion reduced c-Src abundance and cellular motility., Activated c-Jun/AP-1 turns on Matrix metalloproteinase-9 gene expression and promotes cell motility of RBA-1 cells., A link between AP-1 and Rho-GTPase function in invasio…	info:pmid/10209955#abs:9, info:pmid/18216279#body:286, info:pmid/21092323#cont:376, info:pmid/12892714#body:56, info:pmid/16798740#body:390, info:doi/10.1016/j.jsbmb.2003.08.004#body:141	2	6		Neighbors of cell motility, relation 2 T
BRCA2 ---> oxidative stress		Regulation	The breast cancer susceptibility genes BRCA1 and BRCA2 are involved in protection against oxidative stress in that both genes have roles in DNA repair, regulation of cell cycle progression, and genomic integrity, as caretakers .	info:pmid/22019631#body:22	2	1		Neighbors of oxidative stress, relation 2 T
TTK ---> cell cycle arrest		Regulation	Over-expression of MPS1 causes a MAD/BUB-dependent cell cycle arrest in cells with functional spindles (Hardwick et al., 1996)., In yeast, the Mps1 kinase is required for both spindle pole body duplication and cell cycle arrest in response to spindle defects (Weiss and Winey 1996)., Mps1 overexpression ectopically activates the spindle checkpoint, causing cell cycle arrest with a bipolar spindle.…	info:pmid/10329618#body:117, info:pmid/9925642#body:267, info:pmid/12769845#body:112, info:pmid/12007431#body:48	2	4		Neighbors of cell cycle arrest, relation 2 T
ANLN --+> cell motility	Pancreas {Organ urn:agi-ncimorgan:C1278931}	Regulation	Anillin over-expression in lung cancer cell lines leads to increased levels of active RhoA and cell motility .	info:pmid/20732437#body:268	2	1		Neighbors of cell motility, relation 2 T
TNFAIP3 ---> cell cycle arrest		Regulation	TNFAIP3 is involved in cell cycle arrest, apoptosis and it inhibits endothelial cell activation through a NF-kB dependent mechanism .	info:pmid/15935955#body:123	2	1		Neighbors of cell cycle arrest, relation 2 T
ACSL1 ---> Inflammation		Regulation	Principally, ACSL1 inhibition has the promise to affect inflammation only under diabetes-activated conditions and perhaps to add a new dimension of control over the use of fatty acid substrates for the production of inflammatory and anti-inflammatory products., The studies highlighted above demonstrate that diabetes-exacerbated inflammation is associated with increased cytokine and chemokine prod…	info:pmid/22859668#cont:83, info:pmid/23153419#body:82	2	2		Neighbors of Inflammation, relation 2 T
DUSP1 ---| oxidative stress	Ovarian Follicle {Organ urn:agi-ncimorgan:C1283799}	Regulation	Thus, these results suggest that activation of MKP-1 is a survival mechanism against oxidative damage., We show that overexpression of DUSP1 or inhibition of mitogen-activated protein kinase activity significantly increases cellular susceptibility to oxidative damage., The induction of MKP-1 has been shown to be a survival mechanism against oxidative damage in cancer cell lines ., Oxidative stres…	info:pmid/16651445#abs:8, info:pmid/18403641#abs:8, info:pmid/21615929#cont:218, info:pmid/24267255#body:82, info:pmid/12832290#body:228	2	5		Neighbors of oxidative stress, relation 2 T
AXL ---> cell motility	Breast {Organ urn:agi-ncimorgan:C0006141}	Regulation	It appears that all of the domains examined are important for Axl-mediated cell motility., Axl regulates esophageal adenocarcinoma cell motility through Ral-dependent mechanisms., These data support a role for phosphatidylinositol-3-kinase in Axl-mediated cell motility., The value of Axl as a therapeutic target has been validated using potent Axl kinase inhibitors that inhibited breast cancer cel…	info:pmid/24064382#body:118, info:pmid/20818175#cont:294, info:pmid/17332061#body:288, info:pmid/21068757#cont:439, info:pmid/24333418#body:8, info:pmid/22910292#cont:23	2	6		Neighbors of cell motility, relation 2 T
DDB2 ---> cell cycle arrest		Regulation	Degradation of DDB2 might contribute to cell cycle arrest by preventing its enhancement of E2F1 transcriptional activity.	info:pmid/12509284#body:305	2	1		Neighbors of cell cycle arrest, relation 2 T
AXL --+> oxidative stress		Regulation	The kinase activity of Axl is required for the Axl-mediated cell migration and prolongs the half-life of phospho-Akt under oxidative stress., In summary, Axl is an important signaling mediator for oxidative stress in cultured vascular smooth muscle cells and intact vessels and may represent an important therapeutic target for vascular remodeling and response to injury., Most importantly we demons…	info:pmid/24064382#abs:8, info:pmid/15123721#abs:11, info:pmid/20643227#body:188	2	3		Neighbors of oxidative stress, relation 2 T
EEF2K --+> oxidative stress	Ovary {Organ urn:agi-ncimorgan:CL384202}	Regulation	Because knockout of eEF2K in mouse embryonic fibroblasts or oocytes prevents apoptosis from genotoxic and oxidative stress, this suggests that an accumulation of unhealthy oocytes at advanced age in Eef2K-/- ovaries could also be due to a defect of apoptosis in oocytes ( A).	info:pmid/24582807#body:113	2	1		Neighbors of oxidative stress, relation 2 T
JUN ---> DUSP1		PromoterBinding	The increase in mkp1 mRNA level requires the MLK-JNK-c-Jun pathway, and we show that Mkp1 is an important regulator of JNK-dependent apoptosis in sympathetic neurons., The Mkp-1 promoter contains three consensus cAMP-response element sites for the CREB family, including ATF1, ATF2, ATF3, CREB1, and Jun (34).	info:pmid/20702711#abs:5, info:pmid/24126911#cont:326	2	2		all PPI, relation 2 T
DUSP1 ---| JUN		Expression	MKP-1 inactivates MAP kinase and therefore may interfere with the activation of c-jun and c-fos., Co-transfection of MKP-1, a specific MAP kinase antagonist, blocks the stimulation of c-Jun by c-Mos, while co-transfection of a dominant negative form of c-Raf-1 does not., Additionally, two dual-activity phosphatases (CL 100 and MKP-5), which inactivate the c-jun-NH2-kinases, showed augmented expre…	info:pmid/9724088#abs:6, info:pmid/8920903#abs:4, info:pmid/15713895#abs:8, info:pmid/20702711#abs:6, info:pmid/9020184#body:237, info:pmid/11064451#body:126, info:pmid/22570691#cont:302	2	7		all PPI, PPI with vit D and Rec, relation 2 T
ANXA2 --+> CTSD		Regulation	The authors elected to do limited validation studies and demonstrated that annexin 2, cathepsin D, and integrin ß1 were also up-regulated by Western blot, and annexin 2 and integrin ß1 increased specifically in ductal epithelial cancer cells by tissue microarray immunohistochemistry.	info:pmid/16230087#body:24	2	1		all PPI, PPI with vit D and Rec, relation 2 T
G6PD --+> DUSP1		Regulation	Our findings suggest that G6PD knockdown postpones and inhibits the H 2O 2-induced activity of MKP-1.	info:pmid/20420899#body:99	2	1		all PPI, PPI with vit D and Rec, relation 2 T
PDPK1 ---> MALT1	germinal center of lymph node {Organ urn:agi-ncimorgan:C0282491}	DirectRegulation	For example, it has been suggested that PDK1 acts as a scaffold to assemble the CARMA1-BCL10-MALT1 complex [ ]., PI3K or PDK1 inhibition affects viability, MALT1 protease activity, and NF-?B activation in two activated B-cell–like diffuse large B-cell lymphoma cells., We recently demonstrated that PI3K-PDK1 contributes to enhanced MALT1 activity in the two ABC-diffuse large B cell lymphoma cell l…	info:pmid/16603344#body:67, info:pmid/21173233#cont:141, info:pmid/23238017#body:180, info:pmid/17544292#body:103	2	4		all PPI, PPI with vit D and Rec, relation 2 T
H2AFX ---> RAD18		Regulation	Analysis of mutant mouse embryonic fibroblasts shows that ionizing radiation-induced RAD18 focus formation requires H2AX, MDC1, RNF8, and the Ubc13 E2 ubiquitin conjugating enzyme, but not the downstream-acting proteins NBS1, RAP80, BRCA1, and 53BP1 .	info:pmid/22743550#body:1949	2	1		all PPI, PPI with vit D and Rec, relation 2 T
BRCA2 ---- BRIP1		Binding	BRCA1, BRCA2 (FANCD1), and the BRCA1-associated helicase (FANCJ) function downstream of monoubiquitination of FANCD2 in mammalian cells.	info:pmid/16860002#body:166	2	1		all PPI, PPI with vit D and Rec, relation 2 T
HSPA8 ---- JUN		Binding	ATP enhances the amount of c-Jun and estrogen receptor co-precipitated with HSC70.	info:pmid/22960394#body:393	2	1		all PPI, PPI with vit D and Rec, relation 2 T
BTG2 --+> H2AFX		Regulation	C shows that transduction of TIS21 accelerated the clearance of ?H2AX foci following both 4 and 6h of etoposide treatment, as evidenced by our immunoblot and immunocytochemical analyses.	info:pmid/23089312#body:85	2	1		all PPI, PPI with vit D and Rec, relation 2 T
BRCA2 --+> H2AFX		Expression	Further study revealed that BRCA1/2 counteracted the function of Aurora-A to suppress the expression of ATM/Chk2, but to activate the expression of ATR/Chk1, pp53, ?H2AX, and RAD51, leading to the enhanced cell sensitivity to irradiation and cisplatin, which was also supported by the results from animal assays.	info:pmid/24480460#abs:6	2	1		all PPI, PPI with vit D and Rec, relation 2 T
TGFBR2 --+> cell cycle arrest		Regulation	Replacement of the TGF-ßRII in these cells restores TGF-ß-mediated cell cycle arrest (32).	info:pmid/17761946#body:79	2	1		Neighbors of cell cycle arrest, relation 2 T
PDGFC ---> Inflammation		Regulation	In the present study, VEGF-E chimera genes did cause little inflammation, but promoted angiogenesis to the similar level as did VEGF-A.	info:pmid/17082487#body:207	2	1		Neighbors of Inflammation, relation 2 T
CENPF ---> cell cycle arrest		Regulation	These findings suggest that LEK1 protein depletion results in cell cycle arrest in the G1/S phase, implying that LEK1 depletion inhibits normal cell cycle progression.	info:pmid/14555653#body:356	2	1		Neighbors of cell cycle arrest, relation 2 T
BRIP1 --+> oxidative stress		Regulation	In the future, it will be of interest to examine the cellular localization of FANCJ and the other Fanconi anemia proteins with RPA and additional repair factors after exposure to agents that induce oxidative stress and other forms of DNA damage.	info:pmid/19419957#body:352	2	1		Neighbors of oxidative stress, relation 2 T
PDPK1 ---> oxidative stress		Regulation	Moreover, inactivation of PDK1 by the phosphatase PTEN is abrogated by oxidation, and thus PDK1 participates in the signaling of oxidative stress (36) ., PDK1 modulates oxidative stress, which may explain the sensitivity of Ptpn12-KO cells to reactive oxygen species accumulation induced by antioxidant depletion.14, Phosphorylation of Pdk1 gradually declined during the high-fat diet, but oxidative…	info:pmid/17077298#body:36, info:pmid/23435421#cont:76, info:pmid/22586579#cont:478, info:pmid/21980302#cont:45	2	4		Neighbors of oxidative stress, relation 2 T
AKR1C1 ---| oxidative stress		Regulation	The AKR1C1 gene is induced by reactive oxygen species possibly through an antioxidant response element to protect against oxidative stress (37).	info:pmid/10517672#body:221	2	1		Neighbors of oxidative stress, relation 2 T
JUN --+> PDPK1		PromoterBinding	Inhibition of c-Jun reduces PDK1 expression and attenuates Akt and protein kinase C activity, which can be restored by exogenous PDK1. c-Jun regulation of PDK1 in melanoma contributes to growth rate and the ability to form tumors in mice., induced c-Jun and PDK1 expression, whereas treatment of the lactotransferrin small hairpin RNA/HONE1 cells with either PD98059 (MEK inhibitor) or SP600125 (JNK…	info:pmid/19910471#abs:4, info:pmid/23069661#cont:64	2	2		all PPI, PPI with vit D and Rec, relation 2 T
BTG2 ---| oxidative stress		Regulation	We now report that BTG2 protects human mammary epithelial cells from oxidative stress due to hydrogen peroxide and other oxidants., B cell translocation gene 2 enhances susceptibility of HeLa cells to doxorubicin-induced oxidative damage., Our present results are well supported by a recent study that BTG2 works as a coactivator of the antioxidant transcription factor, NFE2L2, which induces antiox…	info:pmid/22493435#abs:3, info:pmid/18840609#title:1, info:doi/10.1186/1478-811X-11-69#cont:195	2	3		Neighbors of oxidative stress, relation 2 T
PDPK1 --+> cell motility	Breast {Organ urn:agi-ncimorgan:C0006141}, Cerebral cortex {Organ urn:agi-ncimorgan:C0007776}	Regulation	PDK1 knockdown reduces Prostate cancer cell motility., PDK1 regulates cancer cell motility by antagonising inhibition of ROCK1 by RhoE., Our results suggest that both PDK1 and Akt are involved in endothelial cell motility., A further insight on the mechanisms through which PDK1 regulates cell motility has been recently uncovered [38]., It has been reported that PDK1 can control cancer cell motili…	info:pmid/23401739#cont:194, info:pmid/21878495#cont:569, info:pmid/21444753#cont:429, info:pmid/17371830#body:63, info:pmid/21568903#cont:105, info:pmid/22454520#cont:265, info:pmid/22363817#cont:20, info:pmid/21118801#cont:343	2	8		Neighbors of cell motility, relation 2 T
JAG1 ---> cell motility	Ground substance {Organ urn:agi-ncimorgan:C1383501}	Regulation	Because MAGP-2 interacts with Jagged-1 that controls cell-matrix interaction and cell motility, two key factors in elastic fiber macroassembly, microfibril-associated MAGP-2 may stimulate elastic fiber macroassembly by targeting the release of elastin globules from the cell membrane onto developing elastic fibers., RESULTS AND DISCUSSION TOP ABSTRACT INTRODUCTION EXPERIMENTAL PROCEDURES RESULTS A…	info:pmid/17099216#abs:10, info:pmid/14769803#body:83, info:pmid/11427524#body:154	2	3		Neighbors of cell motility, relation 2 T
G6PD ---> Inflammation		Regulation	That is, the two primary biological effects of fluasterone are inhibition of inflammation and concomitant hyperplasia, which is apparently mediated by glucose-6-phosphate dehydrogenase inhibition, and the antiglucocorticoid action, which is almost certainly not mediated by glucose-6-phosphate dehydrogenase inhibition., Consistent with these observations, our results show that inhibition of G6PD a…	info:pmid/19196848#body:276, info:pmid/22287546#cont:359	2	2		Neighbors of Inflammation, relation 2 T
DUSP1 ---> cell motility		Regulation	CL100 expression decreases lamellipodia, filopodia and cellular motility ., It is noteworthy that MKP-1 conditionally expressing cell line U28 decreases formation of lamellipodia and filopodia and cell motility when treated with doxycycline treatment (Manzano et al., 2002).	info:pmid/12080474#body:116, info:pmid/18922965#body:834	2	2		Neighbors of cell motility, relation 2 T
HSPA8 ---| cell cycle arrest		Regulation	HSC-71 has several reported functions of interest in retrovirus infections: overexpression of HSC-71 suppressed the cell-cycle arrest induced by viral protein R of human immunodeficiency virus and thereby reduced apoptosis of infected cells (Iordanskiy et al., 2004[Down]).	info:pmid/16033971#body:272	2	1		Neighbors of cell cycle arrest, relation 2 T
JUN ---> CEBPD		PromoterBinding	Here, it was suggested that C/EBPdelta gene was activated by lipopolysaccharide through transcription factors Sp1, c-Rel, and c-Jun., In summary, we suggest that Sp1, c-Rel and c-Jun transcription factors play important roles in activation of C/EBPdelta gene promoter under the stimulation of PGN., Thus, CEBPD expression can also be modulated through modification of the c-Jun protein., The transcr…	info:pmid/17965828#abs:2, info:pmid/17273900#abs:9, info:pmid/24155666#cont:194, info:pmid/22514649#cont:154	2	4		all PPI, relation 2 T
CEBPD ---| JUN	Mammary Gland {Organ urn:agi-ncimorgan:C0929301}	Regulation	Our preliminary data suggest that CEBPD could repress Bcl-2, cyclin D1, HMGA1, and Jun, but activate PPAR? and MET.4 On the other hand, YY1 functions in the genomic imprinting have been reported (,59).	info:pmid/18753137#body:408	2	1		all PPI, PPI with vit D and Rec, relation 2 T
AKR1C1 --+> Inflammation	Placenta {Organ urn:agi-ncimorgan:C1550656}, Uterus {Organ urn:agi-ncimorgan:C1269032}	Regulation	An important role of PRL expression in the uterus of placental mammal is to silence the expression of genes that are detrimental to pregnancy, such as IL-6 and 20a-HSD, which promote inflammation and catabolize progesterone, respectively (13, 18, 19)., Decidual prolactin additionally inhibits the expression of interleukin 6 (IL-6), a pro-inflammatory cytokine, and the expression of 20 a-hydroxyst…	info:pmid/18809929#body:74, info:pmid/22169962#cont:48	2	2		Neighbors of Inflammation, relation 2 T
ACSL1 ---- SERP1		Binding	Wild-type Serp-1 bound to the monocyte cell surface with a clear shift on FACS analysis (Fig. 1D) .	info:pmid/19052145#body:169	2	1		all PPI, PPI with vit D and Rec, relation 2 T
ANXA2 ---- ATP1B1		Binding	Treatment of MSV-Beta-GFP cells with bisindolylmalemide, a general Protein Kinase C inhibitor, abolished PI3-Kinase activation and its down stream effects of Rac1 activation, binding of Na,K-Beta to annexin II, and suppression of cell motility and attachment., The amount of annexin II bound to Na,K-ß was detected by immunoblotting.	info:pmid/17535735#abs:3, info:pmid/15616195#body:210	2	2		all PPI, PPI with vit D and Rec, relation 2 T
MTF1 ---> JUN		Regulation	We also note that the MTF-1 null mutant phenotype bears some similarity to those of two other regulators of cellular stress response, namely c-Jun and NF-kappaB (p65/RelA).	info:pmid/9582278#abs:9	2	1		all PPI, PPI with vit D and Rec, relation 2 T
ECT2 --+> JUN		Regulation	Although several recent reports have suggested that JNK activity is required for full Bcr/Abl- and Ras-induced transformation (42, 54, 64, 65), we have observed that at least one potently transforming Dbl family member, Ect2, shows relatively weak activation of JNK and c-Jun whereas a non-transforming derivative of Lfc (Lfc-D13hemagglutinin) exhibited strong activation of the c-Jun reporter.	info:pmid/9642229#body:291	2	1		all PPI, PPI with vit D and Rec, relation 2 T
LIMS1 ---> PDPK1		Regulation	How PINCH1 affects PDK1 activity and consequently Thr308 phosphorylation is unclear.	info:pmid/16317048#body:82	2	1		all PPI, PPI with vit D and Rec, relation 2 T
STARD4 ---> oxidative stress		Regulation	StarD4-mediated translocation of 7-hydroperoxycholesterol to isolated mitochondria: deleterious effects and implications for steroidogenesis under oxidative stress conditions.	info:pmid/20059974#title:1, info:pmid/20656919#cont:588, info:pmid/23053693#cont:430	2	3		Neighbors of oxidative stress, relation 2 T
CTSD --+> HSPA8		MolTransport	Loss of contact inhibition and repression of heat shock cognate 70 protein (Hsc70) secretion induced by cathepsin D.	info:pmid/19802014#body:108	2	1		all PPI, PPI with vit D and Rec, relation 2 T
HSPA8 ---| PDPK1		Expression	In contrast, depletion of Hsc70 enhanced the expression of 3-phosphoinositide-dependent kinase 1 (PDK1), which phosphorylates threonine 308.	info:pmid/20018937#body:176	2	1		all PPI, PPI with vit D and Rec, relation 2 T
KIAA0101 ---> cell cycle arrest		Regulation	In addition, CCNB2, ASPM, KIAA0101, and CDCA7 are known to be involved in DNA repair, DNA replication, and cell cycle arrest , whereas SLC27A2 plays a role in fatty acid transport .	info:pmid/23282137#cont:17	2	1		Neighbors of cell cycle arrest, Ko2 -1, relation 2 T
ANXA2 ---> oxidative stress	Microvessels {Organ urn:agi-ncimorgan:C2350570}	Regulation	Our results provided an explanation for this observation, since annexin A2 antioxidant function will protect the cancer cells from oxidative damage/death induced by the chemotherapeutic agents., However, even though IR produced a larger number of p53-binding protein 1 foci as expected, the most significant difference for the number of foci between annexin A2 depleted versus control cells was obse…	info:pmid/23434659#cont:279, info:pmid/23226323#cont:235	2	2		Neighbors of oxidative stress, lane2 4, relation 2 T
ITPKC ---> Inflammation		Regulation	ITPKC is also involved in the inflammation after PD-1 signal pathway (12).	info:embase/2012600795#cont:214	2	1		Neighbors of Inflammation, relation 2 T
AXL ---> Inflammation	Kidney {Organ urn:agi-ncimorgan:C1278978}	Regulation	Growth arrest-specific protein 6 (Gas6) and its receptor Axl are known to regulate inflammation and may be implicated in lupus pathogenesis., At the same time, Axl and Mer are expressed in dendritic cells and macrophages and have an essential function in limiting inflammation., Twist mediates suppression of inflammation by type I IFNs and Axl ., Twist mediates suppression of inflammation by type …	info:pmid/21278074#abs:3, info:pmid/23878224#abs:3, info:pmid/23732585#cont:338, info:pmid/23071254#cont:703, info:pmid/23341490#cont:258, info:pmid/23774230#cont:100	2	6		Neighbors of Inflammation, relation 2 T
HSPA8 ---> cell motility	Microvessels {Organ urn:agi-ncimorgan:C2350570}	Regulation	of Hsc70 impaired the cell motility induced by nucleolin over-expression (Figure 5A).	info:pmid/22743058#cont:244	2	1		Neighbors of cell motility, relation 2 T
JUN ---> ACSL1		PromoterBinding	F, LPS treatment enhanced c-Jun binding to the Acsl1 promoter at a site 1250 bp upstream of the transcription start site., Reintroduction of c-jun by retroviral transduction into c-jun-/- cells reversed the increase in 2'7'-dichlorofluorescein diacetate positivity by FACS (data not shown).	info:pmid/23426369#cont:248, info:pmid/20926681#cont:194	2	2		all PPI, PPI with vit D and Rec, relation 2 T
BRIP1 --+> H2AFX		Regulation	... with the fancj-/- FANCJ-WT cells, fancj null cells transfected with either empty vector or FANCJ Q mutations (Q25A and ?Q) showed very similar reduction in percent survival as a function of cisplatin dose and were ~60-fold more sensitive at the highest concentration of cisplatin (1 µM). ?H2AX foci, a marker of the double strand break, were elevated by ~3.5-fold in cisplatin-treated fancj-/- F…	info:pmid/22582397#cont:146	2	1		all PPI, PPI with vit D and Rec, relation 2 T
DDB2 ---| BTG2	Bone of rib {Organ urn:agi-ncimorgan:C0035561}	Regulation	Those included PA26, DDB2, Bax, FasR and Poly(ADP-ribose) polymerase inhibition augments cancer cell apoptosis and death MDM2 in addition to p21CDKN1A and BTG2 (Table S1B).	info:pmid/22101337#cont:41	2	1		all PPI, PPI with vit D and Rec, relation 2 T
CEBPD --+> cell motility	Blood Vessels {Organ urn:agi-ncimorgan:C0005847}	Regulation	Furthermore, expression of C/EBP-d in cultured lymphatic endothelial cells significantly increased cell motility, and knockdown of C/EBP-d inhibited cell motility and lymphatic vascular network formation in vitro.	info:pmid/21666710#abs:7	2	1		Neighbors of cell motility, relation 2 T
BTG2 ---| cell motility		Regulation	Knockdown of BTG2 increases cell motility.	info:pmid/21339742#cont:100	2	1		Neighbors of cell motility, relation 2 T
ANXA2 ---| JUN		Regulation	The results showed that ANXA2 silencing caused the loss of c-Jun binding to the p53 promoter (Fig. 7F).	info:pmid/22859294#cont:309	2	1		all PPI, PPI with vit D and Rec, relation 2 T
RAD18 ---> BRCA2		Regulation	These genes mainly operate in pathways of the DDR that are activated by stalled replication forks (ATR, CHEK1 and RAD18) and homologous recombination-directed repair (BRCA1, BRCA2, RAD51, SHFM1, REV1L and REV3L).	info:pmid/21239890#cont:178	2	1		all PPI, PPI with vit D and Rec, relation 2 T
ANLN ---- TTK	Cerebral cortex {Organ urn:agi-ncimorgan:C0007776}	Binding	An interaction between Mps1 interacting protein-1 and anillin could explain the complexity of effects we observed with Mps1 interacting protein-1 reduction in cells.	info:pmid/21325884#cont:180	2	1		all PPI, PPI with vit D and Rec, Relation 1, relation 2 T
ANLN --+> TTK	Cerebral cortex {Organ urn:agi-ncimorgan:C0007776}	Regulation	Like reduction of anillin, decreased Mps1 interacting protein-1 levels leads to spindle oscillation, increased membrane blebbing and binucleate cells.53,55	info:pmid/21325884#cont:175	2	1		all PPI, Relation 1, relation 2 T
JUN ---| AKAP12		Regulation	Akap12 is severely downregulated by oncogenic forms of Src, Ras, Myc and Jun,4 but not by oncogenic forms of Raf,	info:pmid/21099353#cont:17	2	1		all PPI, PPI with vit D and Rec, relation 2 T
TTK ---> H2AFX		Regulation	Moreover, we observed that TTK silencing led to an increase in H2AX phosphorylation, activation of caspases 3/7, sub-G1 cell population accumulation and high annexin V staining, as well as to a decrease in G1 phase cell population and an increased aneuploidy.	info:pmid/23700430#abs:9	2	1		all PPI, PPI with vit D and Rec, relation 2 T
FGD4 --+> cell motility		Regulation	Depletion of FGD4 or Cdc42 significantly reduced (~50%) the latent membrane protein 1-stimulated cell motility, an effect that was partially reversed by expression of a constitutively active mutant of Cdc42.	info:pmid/22589722#abs:9	2	1		Neighbors of cell motility, relation 2 T
ANXA2 ---> H2AFX	Microvessels {Organ urn:agi-ncimorgan:C2350570}	Regulation	However, annexin A2 depletion in both telomerase immortalized microvascular endothelial and MCF7 cells did not by itself lead to a striking increase in DNA damage, as increased H2AX phosphorylation or accumulation of p53 in the non treated annexin A2 depleted cells was not observed.	info:pmid/23226323#cont:229	2	1		all PPI, PPI with vit D and Rec, relation 2 T
TRIM33 ---> H2AFX		Regulation	Loss of TRIM33 leads to increased base-line H2AX phosphorylation and activation of cell cycle checkpoints, suggesting that it may be required for efficient DNA repair.	info:pmid/23926104#cont:354	2	1		all PPI, PPI with vit D and Rec, relation 2 T
MALT1 ---> TNFAIP3		Regulation	In addition to 17% of cases with t(11;18), extra copies of MALT1 (18q21) and/or focal gains of REL (2p15–p16) and/or monoallelic/biallelic deletions affecting TNFAIP3 (6q23) were identified in an additional 46% of MALT lymphomas, totaling 63% of MALT lymphoma cases with abnormalities affecting regulatory genes from the nuclear factor kappa B signaling pathway (Figure 4a).	info:pmid/22301699#cont:211	2	1		all PPI, PPI with vit D and Rec, relation 2 T
ANXA2 --+> AXL		Expression	Recent work by our group has also shown that Anxa2 binding induces the expression of Axl, the receptor to growth arrest specific-6.42	info:pmid/22367179#cont:114	2	1		all PPI, PPI with vit D and Rec, relation 2 T
AKAP12 ---> Inflammation	Central Nervous System {Organ urn:agi-ncimorgan:C0927232}	Regulation	Src-suppressed C kinase substrate (SSeCKS) is involved in inflammation in the central nervous system , and plays a role in control of cell signaling and cytoskeletal arrangement., These results indicate that SSeCKS is one of the major lipopolysaccharide-responsive proteins and may participate in alteration of cytoskeletal architecture in endothelial cells during inflammation.	info:pmid/20155814#abs:1, info:pmid/11799143#abs:7	2	2		Neighbors of Inflammation, relation 2 T
ZNF24 --+> Inflammation		Regulation	The loss of Zfp191 may suppress systemic inflammation by reducing these cytokine levels during lipopolysaccharide-induced endotoxic shock.	info:pmid/22183946#abs:9	2	1		Neighbors of Inflammation, relation 2 T
ZNF143 ---> cell motility		Regulation	These data suggest that ZNF143 is involved in cellular motility through a ZEB1-E-cadherin-linked pathway in colon cancer cells.	info:pmid/24009065#abs:6	2	1		Neighbors of cell motility, relation 2 T
HSPA8 ---> H2AFX		Regulation	The length of the delay of gamma-H2AX/MDC1/53BP1 complex formation correlated with the magnitude of heat radiosensitization and was modulated by the molecular chaperone Hsc70.	info:pmid/19244134#abs:8	2	1		all PPI, PPI with vit D and Rec, relation 2 T
FXYD3 --+> ANXA2		Expression	In addition, we found that basal expression levels of SSAT, annexin II, thymosin beta-10, and chaperonin-10 were increased (by approximately 2-3-fold), and MAT-8 expression dramatically increased (by approximately 10-fold) in a 5-Fluorouracil-resistant colorectal cancer cell line (H630-R10) compared with the parental H630 cell line, suggesting these genes may be useful biomarkers of resistance.	info:pmid/12907638#abs:9	2	1		all PPI, PPI with vit D and Rec, relation 2 T
PDGFC --+> DUSP1	Umbilical vein {Organ urn:agi-ncimorgan:C1280193}	Expression	VEGF-A and VEGF-E maximally induced MKP-1 expression in ECs; however, the other VEGF subtypes had no effect.	info:pmid/18003751#abs:3	2	1		all PPI, PPI with vit D and Rec, relation 2 T
AXL ---> cell cycle arrest		Regulation	We found that Axl-Fc, a pharmacologic Axl inhibitor, or small interfering RNA targeting Axl inhibits cell growth, induces cell-cycle arrest and apoptosis, and relieves a block in myeloid differentiation of FLT3-internal tandem duplication(+) acute myeloid leukemia in vitro.	info:pmid/23321254#abs:5	2	1		Neighbors of cell cycle arrest, relation 2 T
JUN --+> Inflammation	Kidney Glomerulus, Epidermis, Brain	Regulation	Activation of c-Jun may be involved in the regulation of inflammation and/or fibrosis in human renal disease., TNFalpha shedding and epidermal inflammation are controlled by Jun proteins., The interplay between Akt and JNK or c-Jun in apoptosis or stress-induced inflammation is diverse., Thus, C-JUN and AP1 upregulation can have a role in the neurovascular inflammation triggered by aggregation of…	info:pmid/17891746#abs:10, info:pmid/19933155#title:1, info:pmid/16332992#body:280, info:pmid/21298039#body:233	2	4		Duchenne Muscular Dystrophy Overview, Neighbors of Inflammation, relation 2 T
