# Supplementary material for: 1,25-Dihydroxyvitamin D3 Suppresses Prognostic Survival Biomarkers Associated with Cell Cycle and Actin Organization in a Non-Malignant African American Prostate Cell Line
Source: Biology (Basel). 2024 May 15;13(5):346. doi: 10.3390/biology13050346 (PMC11118023; doi:10.3390/biology13050346)
Supplement: Supplementary file 1 [file biology-13-00346-s001.zip › ST4_Pathway Studios gene-gene interaction association with Disease and Function.xlsx]

## Sheet: Protein List 
Supplemental Table S4: Pathway Studios Protein List associated with Disease and Function
Name	Type	Description	Connectivity	Organism	Swiss-Prot Accession	Alias	Found In Pathways	GO Cellular Component	GO Biological Process	GO Molecular Function
ATP1B1	Protein	ATPase, Na+/K+ transporting, beta 1 polypeptide	126	Homo sapiens, Mus musculus, Rattus norvegicus	A3KLL5, P05026, A6NGH2, P14094, Q3TV47, Q545P0, P07340, Q63062, Q5TGZ3	ATP1B, sodium/potassium-transporting ATPase subunit beta-1, adenosinetriphosphatase, sodium pump subunit beta-1, Na, K-ATPase beta-1 polypeptide, Beta 1-subunit of Na(+),K(+)-ATPase, sodium/potassium-dependent ATPase beta-1 subunit, sodium/potassium-transporting ATPase beta-1 chain, sodium-potassium ATPase subunit beta 1 (non-catalytic), Atpb <more data available...>	Changes of Homeostasis in Myocardial Ischemia, Neighbors of actin organization, Neighbors of morphogenesis, Neighbors of cell polarity, Neighbors of contraction, Neighbors of cell motility, Neighbors of cell proliferation, New Pathway, Neighbors of cell adhesion, Neighbors of Respiratory chain <more data available...>	membrane, integral component of membrane, sodium:potassium-exchanging ATPase complex, caveola, apical plasma membrane, basolateral plasma membrane, plasma membrane	leukocyte migration, ATP catabolic process, blood coagulation, blastocyst development, transmembrane transport, cell adhesion, ion transmembrane transport, sodium ion transmembrane transport, potassium ion transmembrane transport, ion transport <more data available...>	sodium:potassium-exchanging ATPase activity
ACSL1	Protein	acyl-CoA synthetase long-chain family member 1	305	Homo sapiens, Mus musculus, Rattus norvegicus	P33121, E7EPM6, B7Z452, P41216, P18163, Q6GTG6, Q9DBK5, D3DP57, P41215, Q8N8V7 <more data available...>	ACS1, LACS, FACL1, FACL2, LACS1, LACS2, long-chain-fatty-acid--CoA ligase 1, LACS 1, LACS 2, acyl-CoA synthetase 1 <more data available...>	Obesity Induced Insulin Resistance in Myocytes, Insulin Resistance in Hepatocytes, Insulin Influence on Lipogenesis, Neighbors of cell proliferation, Neighbors of apoptosis, Neighbors of vesicular trafficking, Neighbors of cell growth, Neighbors of internalization, Neighbors of cell differentiation, Neighbors of Neoplasms <more data available...>	membrane, integral component of membrane, endoplasmic reticulum membrane, mitochondrial outer membrane, peroxisomal membrane, plasma membrane, endoplasmic reticulum, mitochondrion, peroxisome, intracellular membrane-bounded organelle	metabolic process, lipid metabolic process, small molecule metabolic process, lipid biosynthetic process, triglyceride biosynthetic process, cellular lipid metabolic process, fatty acid metabolic process, long-chain fatty acid metabolic process, unsaturated fatty acid metabolic process, alpha-linolenic acid metabolic process <more data available...>	long-chain fatty acid-CoA ligase activity, catalytic activity, ligase activity, acetate-CoA ligase (ADP-forming) activity, acetate-CoA ligase activity, nucleotide binding, ATP binding
G6PD	Protein	glucose-6-phosphate dehydrogenase	653	Homo sapiens, Mus musculus, Rattus norvegicus	P11413, Q00612, Q790Y8, P05370, D3DWX9, Q16000, Q16765, Q8IU70, Q8IU88, Q8IUA6 <more data available...>	G6PD1, glucose-6-phosphate 1-dehydrogenase, glucose-6-phosphate dehydrogenase, G6PD, G28A, G6pd, Gpdx, RP23-436K3.17-003, glucose-6-phosphate 1-dehydrogenase X, G6pdx, glucose-6-phosphate dehydrogenase X-linked <more data available...>	Overview of Mitochondrial Dysfunction in Alzheimer's Disease, Tricarboxylic Acid Cycle Involvement in Alzheimer's Disease, Multiple Functions of Estrogen in Mitochondria in Alzheimer's Disease, Proteins Involved in Pathogenesis of Congenital Hypothyroidism, Thyroid Hormones in Adipose Tissue Metabolism, Proteins Involved in Pathogenesis of Pulmonary Hypertension, Neighbors of cell redox homeostas…	cytoplasmic side of plasma membrane, centrosome, cytoplasm, cytosol, intracellular membrane-bounded organelle, nucleus	erythrocyte development, erythrocyte maturation, lipid metabolic process, small molecule metabolic process, oxidation-reduction process, pentose biosynthetic process, cholesterol biosynthetic process, NADP biosynthetic process, pentose-phosphate shunt, pentose-phosphate shunt, oxidative branch <more data available...>	oxidoreductase activity, glucose-6-phosphate dehydrogenase activity, carbohydrate binding, protein homodimerization activity, NADP binding, glucose binding
CEBPD	Protein	CCAAT/enhancer binding protein (C/EBP), delta	688	Homo sapiens, Mus musculus	P49716, B9EIA9, Q00322, Q3UE64, Q3U937, Q8BW92, Q14937, Q2M2X9	CELF, CRP3, C/EBP-delta, NF-IL6-beta, CCAAT/enhancer-binding protein delta, c/EBP delta, nuclear factor NF-IL6-beta, c/EBP-related protein 3, transcription factor C EBP delta, nuclear factor interleukin 6beta <more data available...>	Graves Ophthalmopathy, VIPR -> CREB/CEBP signaling, cluster 1 anal5uppl data 5, Neighbors of alternative RNA splicing, Neighbors of cell proliferation, Neighbors of transcription activation, Neighbors of cell cycle progression, Neighbors of cell survival, Neighbors of liver function, Neighbors of cell growth <more data available...>	nucleus	positive regulation of osteoblast differentiation, inner ear development, fat cell differentiation, positive regulation of transcription from RNA polymerase II promoter, negative regulation of transcription, DNA-templated, regulation of transcription, DNA-templated, regulation of transcription from RNA polymerase II promoter, transcription, DNA-templated, transcription from RNA polymerase II prom…	sequence-specific DNA binding transcription factor activity, protein homodimerization activity, protein heterodimerization activity, DNA binding, sequence-specific DNA binding, transcription regulatory region DNA binding
E2F7	Protein	E2F transcription factor 7	85	Homo sapiens, Mus musculus, Rattus norvegicus	Q96AV8, Q6S7F2, Q8BQ55, D4A4D7, A6NC74, B2RMR7, B3KTZ5, B3KUP8, B5MED9, B2RWZ8 <more data available...>	transcription factor E2F7, E2F-7, D10Ertd739e, A630014C11Rik, E-2F7, FLJ12981, RIKEN cDNA A630014C11 gene, E2F7 transcription factor, LOC144455, E2-F7 <more data available...>	down reg, all T, all PPI, Neighbors of cell proliferation, Neighbors of apoptosis, Neighbors of mitosis, Neighbors of Neoplasms, Neighbors of cell cycle, Neighbors of cell growth, Neighbors of embryonal development <more data available...>	transcription factor complex, intracellular, nucleus	positive regulation of DNA endoreduplication, sprouting angiogenesis, placenta development, hepatocyte differentiation, trophoblast giant cell differentiation, chorionic trophoblast cell differentiation, cell cycle, negative regulation of transcription involved in G1-S transition of mitotic cell cycle, negative regulation of cytokinesis, negative regulation of G1-S transition of mitotic cell cycl…	transcription corepressor activity, sequence-specific DNA binding transcription factor activity, DNA binding, core promoter binding
JUN	Protein	jun proto-oncogene	3134	Homo sapiens, Mus musculus, Rattus norvegicus	P05412, P05627, Q52L79, P17325, Q96G93	AP1, AP-1, c-Jun, transcription factor AP-1, p39, jun oncogene, activator protein 1, proto-oncogene c-Jun, enhancer-binding protein AP1, Jun activation domain binding protein <more data available...>	Cell Cycle, Kruppel-like Factor 6 Signaling in Prostate Cancer, Contraction-Induced IL6 Up-regulation in Skeletal Muscles, Dystrophin Glycoprotein Complex Signaling in Duchenne Muscular Dystrophy, Ca2+ Overload in Duchenne Muscular Dystrophy, Duchenne Muscular Dystrophy Overview, IL6 Promotes Inflammation, IGF1 in Muscle Hypertrophy, Proteins Involved in Pathogenesis of Alzheimer's Disease, Osteo…	nucleoplasm, nuclear chromosome, transcriptional repressor complex, nuclear chromatin, nuclear euchromatin, transcription factor complex, cytosol, nucleus	cellular process, monocyte differentiation, positive regulation of monocyte differentiation, toll-like receptor signaling pathway, toll-like receptor 4 signaling pathway, toll-like receptor 10 signaling pathway, toll-like receptor 2 signaling pathway, toll-like receptor TLR1:TLR2 signaling pathway, toll-like receptor 5 signaling pathway, toll-like receptor TLR6:TLR2 signaling pathway <more data a…	Rho GTPase activator activity, RNA polymerase II transcription factor binding transcription factor activity involved in positive regulation of transcription, RNA polymerase II core promoter proximal region sequence-specific DNA binding transcription factor activity involved in positive regulation of transcription, transcription coactivator activity, sequence-specific DNA binding transcription fac…
CLOCK	Protein	clock circadian regulator	466	Homo sapiens, Mus musculus, Rattus norvegicus	O15516, Q3ZCT4, Q53EU0, O08785, Q9WVS9, A0AV01, A2I2N9, O14516, Q9UIT8, Q920Y1	KAT13D, bHLHe8, circadian locomoter output cycles protein kaput, clock homolog, class E basic helix-loop-helix protein 8, circadian locomoter output cycles kaput protein, mKIAA0334, 5330400M04Rik, mCLOCK, circadian locomoter output cycles kaput <more data available...>	Circadian Clock, down reg, all T, all PPI, Neighbors of cell proliferation, Neighbors of apoptosis, Neighbors of cell cycle, Neighbors of cell growth, Neighbors of Cancer, Neighbors of Breast Cancer <more data available...>	nucleolus, transcription factor complex, cytoplasm, cytosol, intracellular membrane-bounded organelle, chromosome, nucleus	rhythmic process, circadian regulation of gene expression, DNA damage checkpoint, signal transduction, cellular response to DNA damage stimulus, entrainment of circadian clock, photoperiodism, cellular response to ionizing radiation, positive regulation of transcription from RNA polymerase II promoter, regulation of transcription, DNA-templated <more data available...>	histone acetyltransferase activity, signal transducer activity, RNA polymerase II transcription factor binding transcription factor activity involved in positive regulation of transcription, RNA polymerase II core promoter proximal region sequence-specific DNA binding transcription factor activity involved in positive regulation of transcription, sequence-specific DNA binding transcription factor…
SP4	Protein	Sp4 transcription factor	74	Homo sapiens, Mus musculus, Rattus norvegicus	Q02446, Q62445, Q63158, O60402, Q32M52	HF1B, SPR-1, transcription factor Sp4, HF-1b, HF1-b, 5730497N03Rik, HF-1b zinc finger protein, trans-acting transcription factor 4, specificity protein 4, Sp4 transcription factor <more data available...>	hd DP, Neighbors of cell differentiation, Neighbors of apoptosis, Neighbors of Neoplasms, Neighbors of Cancer, Neighbors of Abnormalities, Neighbors of cell cycle, Neighbors of transcription activation, all mirna from neiighbor from, down reg <more data available...>	nucleus	regulation of heart contraction, regulation of transcription, DNA-templated, regulation of transcription from RNA polymerase II promoter, transcription, DNA-templated	transcription coactivator activity, sequence-specific DNA binding transcription factor activity, nucleic acid binding, DNA binding, metal ion binding
VDR	Protein	vitamin D (1,25- dihydroxyvitamin D3) receptor	1598	Homo sapiens, Mus musculus, Rattus norvegicus	F1D8P8, P11473, P48281, P13053, Q922X0, B2R5Q1, G3V1V9, Q5PSV3	NR1I1, vitamin D3 receptor, 1,25-dihydroxyvitamin D3 receptor, vitamin D nuclear receptor variant 1, nuclear receptor subfamily 1 group I member 1, vitamin D receptor, vitamin D (1,25-dihydroxyvitamin D3) receptor, Vitamin D3 receptors, vitamin D receptors, Vitamin D (125-dihydroxyvitamin D3) receptors <more data available...>	Prostate Cancer Overview, Immune Response Activation in Hashimoto's Thyroiditis, Proteins Involved in Pathogenesis of Psoriasis, Proteins Involved in Pathogenesis of Diabetes Mellitus Type 1, Proteins Involved in Pathogenesis of Inflammatory Bowel Diseases, Common Genomic Effects of Thyroid Hormones, Effects of Hyperthyroidism on Bone Remodeling, Proteins Involved in Pathogenesis of Melanoma, Pro…	T-tubule, nucleoplasm, nuclear chromosome, nuclear heterochromatin, cytosol, intracellular membrane-bounded organelle, nucleus	decidualization, mammary gland branching involved in pregnancy, lactation, regulation of calcidiol 1-monooxygenase activity, positive regulation of vitamin D 24-hydroxylase activity, multicellular organismal development, positive regulation of apoptotic process involved in mammary gland involution, intestinal absorption, skeletal system development, organ morphogenesis <more data available...>	steroid hormone receptor activity, calcitriol receptor activity, lithocholic acid receptor activity, ligand-activated sequence-specific DNA binding RNA polymerase II transcription factor activity, sequence-specific DNA binding transcription factor activity, retinoid X receptor binding, vitamin D binding, calcitriol binding, lithocholic acid binding, DNA binding <more data available...>
AXL	Protein	AXL receptor tyrosine kinase	426	Homo sapiens, Mus musculus, Rattus norvegicus	M0R0W6, P30530, Q6PE80, Q8CCF8, Q00993, Q8VI99, Q8VIA0, Q80YQ3, Q8N5L2, Q9UD27	UFO, JTK11, tyrosine-protein kinase receptor UFO, AXL oncogene, AXL transforming sequence/gene, Ark, Tyro7, AI323647, ufo oncogene homolog, adhesion-related kinase <more data available...>	Mechanism of Cetuximab Resistance in Colorectal Cancer, Glioma Invasion Signaling, Proteins Involved in Pathogenesis of Glioma, Neighbors of cell proliferation, Neighbors of apoptosis, Neighbors of cell growth, Neighbors of cell cycle, Neighbors of Cancer, Neighbors of Neoplasms, Neighbors of viral reproduction <more data available...>	membrane, cell, integral component of membrane, integral component of plasma membrane, cell surface, intracellular, plasma membrane, extracellular space	immune system process, spermatogenesis, vagina development, ovulation cycle, erythrocyte homeostasis, dendritic cell differentiation, natural killer cell differentiation, positive regulation of natural killer cell differentiation, innate immune response, negative regulation of lymphocyte activation <more data available...>	transmembrane receptor protein tyrosine kinase activity, transferase activity, transferase activity, transferring phosphorus-containing groups, kinase activity, protein kinase activity, protein tyrosine kinase activity, phosphatidylinositol 3-kinase binding, growth factor binding, myosin heavy chain binding, protein heterodimerization activity <more data available...>
NOTCH2	Protein	notch 2	431	Homo sapiens, Mus musculus, Rattus norvegicus	Q04721, Q6IQ50, Q9UFD5, G5E8J0, O35516, Q9QW30, Q06008, Q60941, Q5T3X7, Q99734 <more data available...>	hN2, AGS2, HJCYS, neurogenic locus notch homolog protein 2, Notch homolog 2, N2, AI853703, Motch B, Notch gene homolog 2, Notch gene homolog II <more data available...>	Proteins Involved in Pathogenesis of Breast Cancer Related to NOTCH Signaling Pathway, Proteins Involved in Pathogenesis of Glioma, Ependymoma, Medulloblastoma Overview, Notch -> TCF3 signaling, Neighbors of cell migration, Neighbors of cell-cell adhesion, Neighbors of cell invasion, Neighbors of Cancer, Neighbors of cell growth <more data available...>	membrane, cell, extracellular region, integral component of membrane, integral component of plasma membrane, endoplasmic reticulum membrane, Golgi membrane, nucleoplasm, receptor complex, cell surface <more data available...>	hemopoiesis, positive regulation of osteoclast differentiation, inflammatory response to antigenic stimulus, humoral immune response, multicellular organismal development, stem cell maintenance, left-right axis specification, determination of left-right symmetry, heart looping, interleukin-4 secretion <more data available...>	receptor activity, enzyme binding, NF-kappaB binding, calcium ion binding
TGFBR2	Protein	transforming growth factor, beta receptor II (70/80kDa)	938	Homo sapiens, Mus musculus, Rattus norvegicus	D2JYI1, P37173, A3QNQ0, Q543C0, Q62312, Q8BQS9, Q3UG22, P38438, Q63947, B4DTV5 <more data available...>	AAT3, FAA3, MFS2, RIIC, LDS1B, LDS2B, TAAD2, TGFR-2, TGFbeta-RII, TGF-beta receptor type-2 <more data available...>	Cell Cycle, Prostate Cancer Overview, Metastatic Colorectal Cancer Overview, Proteins Involved in Pathogenesis of T-cell Acute Lymphoblastic Leukemia, Chronic Myeloid Leukemia Overview, Hodgkin Lymphoma Overview, Diffuse Large-B-cell Lymphoma Overview, Proteins Involved in Pathogenesis of Prostate Cancer, Activation of Immunoglobulin Class-Switch Recombination, Regulatory T-cell Differentiation <…	membrane, membrane raft, integral component of membrane, external side of plasma membrane, integral component of plasma membrane, transforming growth factor beta receptor homodimeric complex, caveola, receptor complex, cell surface, plasma membrane <more data available...>	embryo implantation, positive regulation of B cell tolerance induction, positive regulation of T cell tolerance induction, positive regulation of tolerance induction to self antigen, embryonic hemopoiesis, positive regulation of NK T cell differentiation, myeloid dendritic cell differentiation, patterning of blood vessels, negative regulation of cardiac muscle cell proliferation, embryo developme…	receptor signaling protein serine-threonine kinase activity, transmembrane receptor protein serine-threonine kinase activity, transforming growth factor beta-activated receptor activity, transforming growth factor beta receptor activity, type II, transferase activity, transferase activity, transferring phosphorus-containing groups, kinase activity, protein kinase activity, protein serine-threonin…
MTF1	Protein	metal-regulatory transcription factor 1	190	Homo sapiens, Mus musculus, Rattus norvegicus	Q14872, Q07243, Q8BSY2, D3ZBT4, B2RAK6, Q96CB1, Q9JJW8	ZRF, MTF-1, metal regulatory transcription factor 1, zinc regulatory factor, transcription factor MTF-1, MRE-binding transcription factor, MRE-binding transcription factor-1, metal-responsive transcription factor 1, Thyls, RP23-168M5.2 <more data available...>	all mirna from neiighbor from, down reg, all T, all PPI, PPI with vit D and Rec, Neighbors of cell proliferation, Neighbors of apoptosis, Neighbors of mitosis, Neighbors of Neoplasms, Neighbors of embryonal development <more data available...>	nucleolus, nucleus	response to metal ion, response to cadmium ion, response to oxidative stress, positive regulation of transcription, DNA-templated, positive regulation of transcription from RNA polymerase II promoter, regulation of transcription, DNA-templated, regulation of transcription from RNA polymerase II promoter, transcription, DNA-templated	transcription coactivator activity, sequence-specific DNA binding transcription factor activity, histone acetyltransferase binding, nucleic acid binding, DNA binding, RNA polymerase II core promoter sequence-specific DNA binding, core promoter binding, metal ion binding
ZNF143	Protein	zinc finger protein 143	156	Homo sapiens, Mus musculus, Rattus norvegicus	P52747, O70230, Q5XIU2, A8K518, B4DLY5, O75559, Q8WUK9, Q8BGB0, Q8CEI6, Q8CI27	SBF, STAF, pHZ-1, zinc finger protein 143, hStaf, SPH-binding factor, transcriptional activator Staf, selenocysteine tRNA gene transcription-activating factor, Zfp79, KRAB14 <more data available...>	down reg, all T, all PPI, Neighbors of cell proliferation, Neighbors of apoptosis, Neighbors of Neoplasms, Neighbors of cell cycle, Neighbors of cell cycle regulation, Neighbors of meiosis, Neighbors of DNA repair <more data available...>	nucleoplasm, nucleus	regulation of transcription, DNA-templated, regulation of transcription from RNA polymerase III promoter, regulation of transcription from RNA polymerase II promoter, transcription, DNA-templated, transcription from RNA polymerase III promoter, transcription from RNA polymerase II promoter, gene expression	nucleic acid binding, DNA binding, metal ion binding
BTG2	Protein	BTG family, member 2	360	Homo sapiens, Mus musculus, Rattus norvegicus	P78543, Q04211, Q3TF68, P27049, Q3KR25, Q5VUT0	PC3, TIS21, protein BTG2, pheochromacytoma cell-3, B-cell translocation gene 2, NGF-inducible anti-proliferative protein PC3, nerve growth factor-inducible anti-proliferative, APRO1, AA959598, BTG family member 2 <more data available...>	hd DP, Neighbors of cell proliferation, Neighbors of cell differentiation, Neighbors of apoptosis, Neighbors of Neoplasms, Neighbors of cell migration, Neighbors of Cancer, Neighbors of cell growth, Neighbors of Neoplasm Metastasis, Neighbors of cell death <more data available...>		DNA repair, anterior-posterior pattern specification, associative learning, dentate gyrus development, skeletal muscle cell differentiation, central nervous system neuron development, neuron differentiation, neuron projection development, negative regulation of apoptotic process, negative regulation of neuron apoptotic process <more data available...>	RNA polymerase II core promoter proximal region sequence-specific DNA binding transcription factor activity involved in positive regulation of transcription
BRIP1	Protein	BRCA1 interacting protein C-terminal helicase 1	78	Homo sapiens, Mus musculus, Rattus norvegicus	Q9BX63, Q5SXJ3, Q3MJE2, Q8NCI5, Q8BJQ8, Q8BKI6	OF, BACH1, FANCJ, Fanconi anemia group J protein, ATP-dependent RNA helicase BRIP1, BRCA1/BRCA2-associated helicase 1, BRCA1-associated C-terminal helicase 1, BRCA1-binding helicase-like protein BACH1, FACJ, 3110009N10Rik <more data available...>	Hereditary Breast and Ovarian Cancer Syndrome, ESR1/ERBB-positive Luminal Breast Cancer, Basal Breast Cancer, Block of DNA Repair and Chromatin Remodeling in Pancreatic Cancer, down reg, all T, all PPI, PPI with vit D and Rec, Neighbors of apoptosis, Neighbors of Neoplasms <more data available...>	nuclear membrane, cytoplasm, nucleus	small molecule metabolic process, DNA repair, double-strand break repair, DNA damage checkpoint, cellular response to vitamin, negative regulation of cell proliferation, cellular response to DNA damage stimulus, regulation of transcription from RNA polymerase II promoter, nucleobase-containing compound metabolic process	ATP-dependent helicase activity, ATP-dependent DNA helicase activity, hydrolase activity, hydrolase activity, acting on acid anhydrides, hydrolase activity, acting on acid anhydrides, in phosphorus-containing anhydrides, helicase activity, nucleotide binding, ATP binding, nucleic acid binding, DNA binding <more data available...>
RAD18	Protein	RAD18 homolog (S. cerevisiae)	144	Homo sapiens, Mus musculus, Rattus norvegicus	Q9NS91, E9Q392, Q8CDH2, Q8CED3, Q9QXK2, A0JPN0, Q58F55, Q9NRT6, Q9CZB8	RNF73, E3 ubiquitin-protein ligase RAD18, hHR18, hRAD18, RING finger protein 73, RAD18, S. cerevisiae, homolog, postreplication repair protein RAD18, postreplication repair protein hRAD18p, Rad18sc, 2810024C04Rik <more data available...>	down reg, all T, all PPI, PPI with vit D and Rec, Neighbors of cell proliferation, Neighbors of apoptosis, Neighbors of mitosis, Neighbors of cell cycle, Neighbors of Cancer, Neighbors of meiosis <more data available...>	replication fork, chromatin, XY body, nucleus	spermatogenesis, DNA repair, cellular response to DNA damage stimulus, response to UV, negative regulation of DNA recombination, protein ubiquitination	ligase activity, ubiquitin protein ligase binding, polyubiquitin binding, nucleic acid binding, DNA binding, damaged DNA binding, Y-form DNA binding, metal ion binding, zinc ion binding
DDB2	Protein	damage-specific DNA binding protein 2, 48kDa	160	Homo sapiens, Mus musculus, Rattus norvegicus	Q92466, Q99J79, D3ZR08, B2R875, Q76E54, Q76E55, Q76E56, Q76E57	DDBB, UV-DDB2, DNA damage-binding protein 2, UV-DDB 2, DDB p48 subunit, UV-damaged DNA-binding protein 2, damage-specific DNA-binding protein 2, xeroderma pigmentosum group E protein, 2610043A19Rik, RP23-20F9.8 <more data available...>	up, all T, all PPI, PPI with vit D and Rec, Neighbors of cell proliferation, Neighbors of apoptosis, Neighbors of mitosis, Neighbors of Neoplasms, Neighbors of cell cycle, Neighbors of cell growth <more data available...>	nucleoplasm, protein complex, nucleus	DNA repair, nucleotide-excision repair, pyrimidine dimer repair, nucleotide-excision repair, DNA damage removal, cellular response to DNA damage stimulus, response to UV, protein polyubiquitination, protein autoubiquitination	ubiquitin-protein ligase activity, DNA binding, damaged DNA binding
BRCA2	Protein	breast cancer 2, early onset	527	Homo sapiens, Mus musculus, Rattus norvegicus	P51587, P97929, Q66MH4, O35923, F8VPU5, O35922, P97383, O00183, O15008, Q13879 <more data available...>	FAD, FACD, FAD1, GLM3, BRCC2, FANCB, FANCD, PNCA2, FANCD1, BROVCA2 <more data available...>	Double Strand DNA Homologous Repair, Hereditary Breast and Ovarian Cancer Syndrome, ESR1/ERBB-positive Luminal Breast Cancer, Basal Breast Cancer, High-grade Serous Ovarian Carcinoma, Proteins Involved in Pathogenesis of High-grade Serous Ovarian Carcinoma, Ovarian Cancer Overview, Proteins Involved in Pathogenesis of Prostate Cancer, Cancer Overview, Proteins Involved in Pathogenesis of Glioblas…	nucleoplasm, nucleolus, centrosome, protein complex, BRCA2-MAGE-D1 complex, intracellular, cytoplasm, secretory granule, nucleus	male meiosis I, homologous chromosome orientation involved in meiotic metaphase I plate congression, oocyte maturation, spermatogenesis, female gonad development, hemopoiesis, cell proliferation, DNA repair, nucleotide-excision repair, double-strand break repair <more data available...>	histone acetyltransferase activity, H4 histone acetyltransferase activity, H3 histone acetyltransferase activity, protease binding, gamma-tubulin binding, DNA binding, single-stranded DNA binding
H2AFX	Protein	H2A histone family, member X	870	Homo sapiens, Mus musculus, Rattus norvegicus	P16104, P27661, D3ZXP3, Q4ZGJ7, Q6IAS5	H2AX, H2A.X, H2A/X, histone H2AX, H2AX histone, histone H2A.x, AW228881, Hist5-2ax, gammaH2ax, histone 5 protein 2ax <more data available...>	INO80 Chromatin Remodeling, TRRAP/TIP60 Chromatin Remodeling, Histone Phosphorylation, Cell Cycle, Double Strand DNA Homologous Repair, Double Strand DNA Non-Homologous Repair, Immunoglobulin Class-Switch Recombination via Alternative End-Joining, Immunoglobulin Class-Switch Recombination via Classical Non-Homologous End-Joining, Neighbors of H2AFX, HeimCTL suppl data 4 <more data available...>	nucleoplasm, condensed nuclear chromosome, nuclear chromatin, replication fork, site of double-strand break, chromosome, telomeric region, chromatin, nucleosome, chromosome, XY body <more data available...>	meiotic nuclear division, spermatogenesis, DNA repair, positive regulation of DNA repair, double-strand break repair, double-strand break repair via homologous recombination, cell cycle, DNA damage checkpoint, cellular response to DNA damage stimulus, response to ionizing radiation <more data available...>	histone binding, enzyme binding, protein heterodimerization activity, DNA binding, damaged DNA binding
CENPF	Protein	centromere protein F, 350/400kDa	147	Homo sapiens, Mus musculus, Rattus norvegicus	P49454, E9Q3P4, Q13171, Q13246, Q5VVM7	CENF, hcp-1, PRO1779, RP11-262H5.1, centromere protein F, mitosin, AH antigen, kinetochore protein CENPF, CENP-F kinetochore protein, cell-cycle-dependent 350K nuclear protein <more data available...>	Kinetochore Assembly, down reg, all T, all PPI, Neighbors of cell proliferation, Neighbors of apoptosis, Neighbors of mitosis, Neighbors of Neoplasms, Neighbors of cell cycle, Neighbors of cell growth <more data available...>	nuclear envelope, nuclear matrix, chromosome, centromeric region, kinetochore, condensed chromosome outer kinetochore, chromatin, spindle pole, spindle, midbody, cytoplasm <more data available...>	cell proliferation, muscle organ development, regulation of striated muscle tissue development, cell differentiation, chromosome segregation, mitosis, mitotic spindle assembly checkpoint, mitotic G2 phase, mitotic M phase, regulation of G2-M transition of mitotic cell cycle <more data available...>	chromatin binding, dynein binding, protein C-terminus binding, transcription factor binding, protein homodimerization activity
HSPA8	Protein	heat shock 70kDa protein 8	884	Homo sapiens, Mus musculus, Rattus norvegicus	P11142, Q53HF2, P63017, P63018, P08109, P12225, Q4FZY7, Q62373, Q62374, Q62375 <more data available...>	LAP1, HSC54, HSC70, HSC71, HSP71, HSP73, NIP71, HEL-33, HSPA10, HEL-S-72p <more data available...>	Transcytosis, Protein Folding, Macrophage Function in Crohn's Disease, Class II Mutations Cause CFTR Misfolding and Degradation in Cystic Fibrosis, ADORA1/2A -> exocytosis, Neighbors of cell migration, Neighbors of cell proliferation, Neighbors of Neoplasm Metastasis, Neighbors of apoptosis, Neighbors of cell differentiation <more data available...>	clathrin-sculpted gamma-aminobutyric acid transport vesicle membrane, spliceosomal complex, nucleolus, ribonucleoprotein complex, protein complex, Prp19 complex, intracellular, plasma membrane, cytoplasm, cytosol <more data available...>	ATP catabolic process, axon guidance, regulation of cell cycle, synaptic transmission, neurotransmitter secretion, post-Golgi vesicle-mediated transport, response to stress, response to unfolded protein, negative regulation of transcription, DNA-templated, regulation of transcription, DNA-templated <more data available...>	ATPase activity, coupled, unfolded protein binding, receptor binding, nucleotide binding, ATP binding, ADP binding
ANXA2	Protein	annexin A2	734	Homo sapiens, Mus musculus, Rattus norvegicus	P07355, P07356, Q542G9, Q07936, Q567R4, Q6N0B3, Q8TBV2, Q96DD5, Q9UDH8	P36, ANX2, LIP2, LPC2, CAL1H, LPC2D, ANX2L4, PAP-IV, annexin A2, annexin-2 <more data available...>	CFTR-Related Ion-Channel Dysfunction in Cystic Fibrosis Airway Epithelium (Class III Mutations), ADRA2C/ADRB2 -> synaptic endocytosis, GFs/TNF -> ion channels, Neighbors of nerve cell differentiation, Neighbors of protein ubiquitination, Neighbors of Injuries, Neighbors of proteolysis, Neighbors of cell migration, Neighbors of cytoskeleton organization and biogenesis, Neighbors of cell differenti…	extracellular matrix, membrane, cell junction, extracellular region, extrinsic component of plasma membrane, stress fiber, protein complex, myelin sheath adaxonal region, midbody, Schmidt-Lanterman incisure <more data available...>	fibrinolysis, regulation of fibrinolysis, body fluid secretion, angiogenesis, positive regulation of vesicle fusion, collagen fibril organization, positive regulation of fibroblast proliferation, protein targeting to plasma membrane, cellular response to acid, positive regulation of protein phosphorylation <more data available...>	phospholipase inhibitor activity, cytoskeletal protein binding, actin filament binding, Rab GTPase binding, calcium-dependent phospholipid binding, phosphatidylinositol-4,5-bisphosphate binding, calcium ion binding
ANLN	Protein	anillin, actin binding protein	93	Homo sapiens, Mus musculus, Rattus norvegicus	Q9NQW6, Q8K298, Q5CZ78, Q6NSK5, Q9H8Y4, Q9NVN9, Q9NVP0, Q8BL79, Q8BLB3, Q8K2N0 <more data available...>	scra, Scraps, actin-binding protein anillin, C78101, 1110037A17Rik, 2900037I21Rik, anillin, actin binding protein (scraps homolog, Drosophila), RGD1561367, anillin, actin binding protein, RIKEN cDNA 2900037I21 gene <more data available...>	cluster 2 (3hits) sham vs 1week, Neighbors of cytoskeleton organization and biogenesis, Neighbors of protein ubiquitination, Neighbors of Abnormalities, Neighbors of cell motility, Neighbors of cell division, Neighbors of mitosis, Neighbors of cell cycle, Neighbors of interphase, Neighbors of spindle assembly <more data available...>	actomyosin contractile ring, cytoplasm, cytoskeleton, actin cytoskeleton, nucleus	cell division, cell cycle, mitosis, regulation of exit from mitosis, mitotic cytokinesis, septin ring assembly	actin binding
AKAP12	Protein	A kinase (PRKA) anchor protein 12	295	Homo sapiens, Mus musculus, Rattus norvegicus	Q02952, Q86TJ9, B2RRE0, Q9WTQ5, Q5QD51, Q5QD49, Q5QD50, Q9Z1F7, O00310, O00498 <more data available...>	SSeCKS, AKAP250, A-kinase anchor protein 12, AKAP 250, kinase scaffold protein gravin, A-kinase anchor protein, 250kDa, Src-Suppressed C Kinase Substrate, myasthenia gravis autoantigen gravin, Srcs5, Tsga12 <more data available...>	Neighbors of cytoskeleton organization and biogenesis, Neighbors of actin organization, Neighbors of synaptic plasticity, Neighbors of apoptosis, Neighbors of mitosis, Neighbors of Nerve Degeneration, Neighbors of cell migration, Neighbors of long-term synaptic potentiation, Neighbors of cell proliferation, Neighbors of cell death <more data available...>	plasma membrane, cytoplasm, cell cortex, cytoskeleton	positive regulation of cAMP biosynthetic process, signal transduction, positive regulation of protein kinase A signaling, regulation of protein kinase C signaling, G-protein coupled receptor signaling pathway, protein targeting, phosphorylation	transferase activity, kinase activity, protein kinase A binding, adenylate cyclase binding, receptor signaling complex scaffold activity
ESPL1	Protein	extra spindle pole bodies homolog 1 (S. cerevisiae)	167	Homo sapiens, Mus musculus, Rattus norvegicus	Q14674, P60330, D3ZDT7, A6H6E3	ESP1, SEPA, separin, caspase-like protein ESPL1, extra spindle poles like 1, separin, cysteine protease, extra spindle poles-like 1 protein, SSE, Cerp, PRCE <more data available...>	Cell Cycle, Centriole Duplication and Separation, Chromosome Condensation, Sister Chromatid Cohesion, Spindle Assembly, hd DP, Neighbors of apoptosis, Neighbors of Neoplasms, Neighbors of Cancer, Neighbors of cell growth <more data available...>	centrosome, cytoplasm, cytosol, nucleus	meiotic spindle organization, meiosis I, homologous chromosome segregation, chromosome segregation, mitotic sister chromatid segregation, positive regulation of mitotic metaphase-anaphase transition, establishment of mitotic spindle localization, negative regulation of sister chromatid cohesion, cytokinesis, mitotic cell cycle <more data available...>	catalytic activity, hydrolase activity, peptidase activity, cysteine-type peptidase activity
LAMB3	Protein	laminin, beta 3	56	Homo sapiens, Mus musculus, Rattus norvegicus	Q13751, Q61087, Q8C5B3, F1LPI5, Q91V90, D3DT88, O14947, Q14733, Q9UJK4, Q9UJL1	LAM5, LAMNB1, BM600-125KDA, RP1-272L16.3, laminin subunit beta-3, nicein-125kDa, kalinin-140kDa, kalinin B1 chain, laminin B1k chain, laminin S B3 chain <more data available...>	cluster 5, ANOVA-FDR, Neighbors of cell proliferation, Neighbors of cell adhesion, Neighbors of Neoplasm Metastasis, Neighbors of cell migration, Neighbors of cell differentiation, Neighbors of Cancer, Neighbors of Neoplasms, Neighbors of Cancer of Stomach <more data available...>	extracellular region, laminin-5 complex, basement membrane, proteinaceous extracellular matrix	epidermis development, brown fat cell differentiation, cell adhesion, extracellular matrix organization, cell junction assembly, hemidesmosome assembly	structural molecule activity, protein complex binding
TTK	Protein	TTK protein kinase	258	Homo sapiens, Mus musculus, Rattus norvegicus	P33981, Q8BY97, Q8BX21, P35761, D4A4S7, A8K8U5, B2RDW2, E1P543, Q15272, Q5TCS0 <more data available...>	ESK, PYT, CT96, MPH1, MPS1, MPS1L1, RP3-357D13.2, dual specificity protein kinase TTK, cancer/testis antigen 96, monopolar spindle 1-like 1 <more data available...>	Cell Cycle, Centriole Duplication and Separation, Kinetochore Assembly, all mirna from neiighbor from, down reg, all T, all PPI, PPI with vit D and Rec, Neighbors of cell proliferation, Neighbors of apoptosis <more data available...>	spindle	mitotic spindle assembly checkpoint, spindle organization, mitotic spindle organization, positive regulation of pathway-restricted SMAD protein phosphorylation, positive regulation of cell proliferation, protein phosphorylation, peptidyl-tyrosine phosphorylation, phosphorylation	transferase activity, transferase activity, transferring phosphorus-containing groups, kinase activity, protein kinase activity, protein tyrosine kinase activity, protein serine-threonine-tyrosine kinase activity, protein serine-threonine kinase activity, nucleotide binding, ATP binding
PDPK1	Protein	3-phosphoinositide dependent protein kinase-1	846	Homo sapiens, Mus musculus, Rattus norvegicus	O15530, E9PER6, Q6A1A2, Q3TRL2, Q3UGN6, Q3UHZ0, Q9Z2A0, O55173, A6H6U3, Q9R1D8 <more data available...>	PDK1, PDPK2, PRO0461, 3-phosphoinositide-dependent protein kinase 1, PkB kinase like gene 1, RP23-153H18.1, mPDK1, Pkb kinase, 3-phosphoinositide dependent protein kinase-1, protein kinase B kinase <more data available...>	Androgen Receptor to SGK1 Signaling in Prostate Cancer, Androgen Receptor to Akt Signaling in Prostate Cancer, Prostate Cancer Overview, Metastatic Colorectal Cancer Overview, Myostatin-IGF1 Crosstalk in Skeletal Muscles, IL6 in Insulin Resistance, Dystrophin Glycoprotein Complex Signaling in Duchenne Muscular Dystrophy, Ca2+ Overload in Duchenne Muscular Dystrophy, Duchenne Muscular Dystrophy Ov…	membrane, cell junction, nucleoplasm, plasma membrane, cytoplasm, cytosol, cytoplasmic membrane-bounded vesicle, nucleus, focal adhesion	negative regulation of toll-like receptor signaling pathway, T cell receptor signaling pathway, regulation of mast cell degranulation, innate immune response, Fc-epsilon receptor signaling pathway, T cell costimulation, blood coagulation, platelet activation, type B pancreatic cell development, regulation of endothelial cell migration <more data available...>	transferase activity, transferase activity, transferring phosphorus-containing groups, kinase activity, protein kinase activity, protein serine-threonine kinase activity, 3-phosphoinositide-dependent protein kinase activity, insulin receptor binding, protein kinase binding, nucleotide binding, ATP binding
DUSP1	Protein	dual specificity phosphatase 1	989	Homo sapiens, Mus musculus, Rattus norvegicus	B4DU40, P28562, P28563, Q3U8K3, Q63683, Q64623, Q548G6, D3DQL9, Q2V508	HVH1, MKP1, CL100, MKP-1, PTPN10, dual specificity protein phosphatase 1, MAP kinase phosphatase 1, protein-tyrosine phosphatase CL100, dual specificity protein phosphatase hVH1, serine/threonine specific protein phosphatase <more data available...>	Proteins Involved in Pathogenesis of Atherosclerosis, Proteins Involved in Pathogenesis of Pulmonary Hypertension, Proteins Involved in Pathogenesis of Glioma, Expression Targets of NF-kB, down reg, all T, all PPI, PPI with vit D and Rec, Neighbors of cell proliferation, Neighbors of apoptosis <more data available...>	nucleoplasm, nucleus	negative regulation of meiotic cell cycle, negative regulation of ERK1 and ERK2 cascade, inactivation of MAPK activity, endoderm formation, cell cycle, intracellular signal transduction, positive regulation of apoptotic process, negative regulation of apoptotic process, regulation of apoptotic process, response to organic substance <more data available...>	MAP kinase tyrosine-serine-threonine phosphatase activity, hydrolase activity, phosphatase activity, phosphoprotein phosphatase activity, protein tyrosine phosphatase activity, protein tyrosine-threonine phosphatase activity, protein tyrosine-serine-threonine phosphatase activity, non-membrane spanning protein tyrosine phosphatase activity
DIAPH3	Protein	diaphanous-related formin 3	45	Homo sapiens, Mus musculus, Rattus norvegicus	B4DPV3, Q9NSV4, Q9Z207, A2A3B8, A2A3B9, A2A3C0, Q18P99, Q18PA0, Q18PA1, Q2KPB6 <more data available...>	AN, DIA2, DRF3, AUNA1, NSDAN, diap3, mDia2, RP11-26P21.1, protein diaphanous homolog 3, diaphanous homolog 3 <more data available...>	nt temoin excl secret, Neighbors of cell differentiation, Neighbors of cell proliferation, Neighbors of Neoplasms, Neighbors of cell migration, Neighbors of Prostate Cancer, Neighbors of focal adhesion assembly, Neighbors of Autistic Disorder, Neighbors of Neoplasm Metastasis, 5 <more data available...>	cytoplasm, cytosol, nucleus	spermatogenesis, actin cytoskeleton organization, cellular component organization	Rho GTPase binding, actin binding
GSG2	Protein	germ cell associated 2 (haspin)	59	Homo sapiens, Mus musculus	A0PJ70, Q8TF76, Q9Z0R0, Q5U5K3, Q96MN1, Q9BXS7, Q99MU9, Q9JJJ4	HASPIN, serine/threonine-protein kinase haspin, H-haspin, germ cell-specific gene 2 protein, haploid germ cell-specific nuclear protein kinase, RP23-263M10.7, GSG2, OTTMUSP00000006423, OTTHUMP00000115873, MGC130563 <more data available...>	down reg, all T, all PPI, Neighbors of cell proliferation, Neighbors of apoptosis, Neighbors of mitosis, Neighbors of cell cycle, Neighbors of mitotic spindle checkpoint, Neighbors of cell differentiation, Neighbors of meiosis <more data available...>	nuclear membrane, spindle, centrosome, cytoplasm, intracellular membrane-bounded organelle, cytoskeleton, chromosome, nucleus	histone H3-T3 phosphorylation involved in chromosome passenger complex localization to kinetochore, cell cycle, mitotic sister chromatid cohesion, regulation of spindle checkpoint, negative regulation of G1-S transition of mitotic cell cycle, intracellular signal transduction, protein phosphorylation, phosphorylation, chromatin modification, protein localization to chromosome, centromeric region	histone kinase activity (H3-T3 specific), transferase activity, transferase activity, transferring phosphorus-containing groups, kinase activity, protein kinase activity, protein serine-threonine kinase activity, nucleotide binding, ATP binding, DNA binding
ECT2	Protein	epithelial cell transforming sequence 2 oncogene	123	Homo sapiens, Mus musculus	Q9H8V3, G5E9L8, Q07139, Q0MT80, Q2M269, Q6U836, Q9NSV8, Q9NVW9, Q3TZP2, Q5DTR8 <more data available...>	ARHGEF31, protein ECT2, epithelial cell-transforming sequence 2 oncogene, AI528536, mKIAA4037, MGC138291, OTTMUSP00000023514, OTTMUSP00000023513, OTTMUSP00000023512, KIAA4037 <more data available...>	Proteins Involved in Pathogenesis of Glioma, down reg, all T, all PPI, PPI with vit D and Rec, Neighbors of cell proliferation, Neighbors of apoptosis, Neighbors of mitosis, Neighbors of Neoplasms, Neighbors of cell migration <more data available...>	cell junction, centralspindlin complex, mitotic spindle, midbody, cytoplasm, cytosol, cytoskeleton, nucleus, cleavage furrow, cell-cell junction <more data available...>	positive regulation of Rho GTPase activity, positive regulation of Cdc42 GTPase activity, activation of Rho GTPase activity, activation of Rac GTPase activity, nervous system development, positive regulation of neuron differentiation, cell differentiation, cell morphogenesis, cell division, cell cycle <more data available...>	GTPase activator activity, guanyl-nucleotide exchange factor activity, Rho guanyl-nucleotide exchange factor activity, signal transducer activity, Rho GTPase binding, protein homodimerization activity
ZBTB1	Protein	zinc finger and BTB domain containing 1	6	Homo sapiens, Mus musculus, Rattus norvegicus	Q9Y2K1, Q5YB37, Q91VL9, Q672J3, A8K6S8, Q86SW8, Q8CDP7, Q99LD2	ZNF909, zinc finger and BTB domain-containing protein 1, Bsg2, AI256369, 9430077A12, C430003J21Rik, brain specific protein 2, KIAA0997, LOC263405, LOC328127 <more data available...>	down reg, all T, all PPI, Neighbors of transcription activation, Relation 1	nucleoplasm, nuclear body, nucleus	immune system process, thymus development, positive regulation of pro-T cell differentiation, B cell differentiation, positive regulation of natural killer cell differentiation, positive regulation of T cell differentiation, T cell differentiation in thymus, positive regulation of T cell mediated immunity, innate immune response, cell differentiation <more data available...>	protein homodimerization activity, protein heterodimerization activity, nucleic acid binding, DNA binding, metal ion binding
JAG1	Protein	jagged 1	687	Homo sapiens, Mus musculus, Rattus norvegicus	P78504, Q99740, Q3UVN4, Q9QXX0, Q63722, P70640, A0AV43, O14902, O15122, Q15816	AGS, AHD, AWS, HJ1, CD339, JAGL1, protein jagged-1, Htu, Ozz, ABE2 <more data available...>	Notch Pathway in Multiple Myeloma Plasma Cells, Osteoclast Activation in Multiple Myeloma, Multiple Myeloma Overview, T-cell Acute Lymphoblastic Leukemia Overview, Hodgkin Lymphoma Overview, Reprogramming of Hodgkin and Reed-Sternberg Cells, Mantle Cell Lymphoma Overview, Breast Cancer Related to NOTCH1 Signaling Pathway, Proteins Involved in Pathogenesis of Breast Cancer Related to NOTCH Signali…	membrane, extracellular region, integral component of membrane, integral component of plasma membrane, plasma membrane, apical part of cell	hemopoiesis, positive regulation of myeloid cell differentiation, multicellular organismal development, nervous system development, angiogenesis, pulmonary artery morphogenesis, aorta morphogenesis, loop of Henle development, distal tubule development, organ morphogenesis <more data available...>	structural molecule activity, growth factor activity, Notch binding, calcium ion binding
MALT1	Protein	mucosa associated lymphoid tissue lymphoma translocation gene 1	217	Homo sapiens, Mus musculus, Rattus norvegicus	A8K5S1, Q9UDY8, Q2TBA3, D4A980, D4A7M2, Q2TBA2, Q811E3, Q8BFT0, Q8C7N9, Q9NTB7 <more data available...>	MLT, MLT1, IMD12, mucosa-associated lymphoid tissue lymphoma translocation protein 1, paracaspase, caspase-like protein, MALT associated translocation, MALT lymphoma-associated translocation, MALT-lymphoma associated translocation, A630046N12 <more data available...>	T-cell Acute Lymphoblastic Leukemia Overview, Diffuse Large-B-cell Lymphoma, ABC Subtype, Diffuse Large-B-cell Lymphoma Overview, Proteins Involved in Pathogenesis of Diffuse Large-B-cell Lymphoma, Mantle Cell Lymphoma Overview, PI3K/AKT/MTOR, NF-kB and BCR Signaling Deregulation in Mantle Cell Lymphoma, Proteins Involved in Pathogenesis of Marginal Zone Lymphoma, Mucosa-Associated Lymphoid Tissu…	nucleolus, protein complex, CBM complex, intracellular, plasma membrane, cytoplasm, cytosol, perinuclear region of cytoplasm, nucleus	B-1 B cell differentiation, T cell receptor signaling pathway, regulation of T cell receptor signaling pathway, positive regulation of T cell cytokine production, innate immune response, Fc-epsilon receptor signaling pathway, B cell activation, positive regulation of T cell activation, T cell proliferation, activation of NF-kappaB-inducing kinase activity <more data available...>	signal transducer activity, kinase activator activity, hydrolase activity, peptidase activity, cysteine-type endopeptidase activity, ubiquitin-protein ligase activity, protein self-association, protease binding
CTSD	Protein	cathepsin D	853	Homo sapiens, Mus musculus, Rattus norvegicus	P07339, P18242, Q3UCD9, Q6P6T6, P24268, Q6IB57	CPSD, CLN10, HEL-S-130P, cathepsin D, lysosomal aspartyl protease, lysosomal aspartyl peptidase, ceroid-lipofuscinosis, neuronal 10, epididymis secretory sperm binding protein Li 130P, CD, CatD <more data available...>	Proteins Involved in Pathogenesis of Alzheimer's Disease, Proteins Involved in Pathogenesis of Melanoma, Proteins Involved in Pathogenesis of Myocardial Ischemia, Neighbors of cell migration, Neighbors of Neoplasms, Neighbors of Injuries, Neighbors of cell proliferation, Neighbors of cell differentiation, Neighbors of Neoplasm Metastasis, Neighbors of apoptosis <more data available...>	extracellular matrix, extracellular region, lysosomal lumen, mitochondrion, lysosome, melanosome, extracellular space	antigen processing and presentation of exogenous peptide antigen via MHC class II, collagen catabolic process, autophagic vacuole assembly, epithelial tube branching involved in lung morphogenesis, cell death, extracellular matrix disassembly, extracellular matrix organization, autophagy, proteolysis	hydrolase activity, peptidase activity, endopeptidase activity, aspartic-type endopeptidase activity, peptide binding
KIAA0101	Protein	KIAA0101	69	Homo sapiens, Mus musculus, Rattus norvegicus	Q15004, H0YMA4, Q9CQX4, Q6RIA2, A6NNU5, A8K3Y3, G9G694, G9G696, Q4VAG2, Q9CZ17 <more data available...>	L5, PAF, OEATC, PAF15, OEATC1, p15PAF, NS5ATP9, OEATC-1, p15/PAF, p15(PAF) <more data available...>	Ko2, Neighbors of mitosis, Neighbors of cell cycle arrest, Neighbors of cell cycle progression, Neighbors of apoptosis, Neighbors of Neoplasms, Neighbors of cell cycle, Neighbors of cell proliferation, Neighbors of protein ubiquitination, Neighbors of cell growth <more data available...>	cytoplasm, perinuclear region of cytoplasm, nucleus	DNA repair, translesion synthesis, centrosome organization, regulation of cell cycle, cellular response to DNA damage stimulus, response to UV, DNA replication	chromatin binding
AKR1C1	Protein	aldo-keto reductase family 1, member C1	213	Homo sapiens, Mus musculus, Rattus norvegicus	Q04828, Q91WR5, Q6AYQ2, Q6P8V0, Q9CX32, P52896, Q5SR15, Q7M4N2, Q9UCX2	C9, DD1, DDH, DDH1, H-37, HBAB, MBAB, HAKRC, DD1/DD2, 2-ALPHA-HSD <more data available...>	Neighbors of apoptosis, Neighbors of cell proliferation, Neighbors of Neoplasms, Neighbors of cell cycle, Neighbors of oxidative stress, Neighbors of DNA repair, Neighbors of cell differentiation, Neighbors of Infection, Neighbors of Breast Cancer, Neighbors of drug resistance <more data available...>	cytoplasm, cytosol	lipid metabolic process, oxidation-reduction process, steroid biosynthetic process, steroid metabolic process, prostaglandin metabolic process, retinoid metabolic process, retinal metabolic process, bile acid metabolic process, progesterone metabolic process, daunorubicin metabolic process <more data available...>	oxidoreductase activity, trans-1,2-dihydrobenzene-1,2-diol dehydrogenase activity, phenanthrene 9,10-monooxygenase activity, ketosteroid monooxygenase activity, oxidoreductase activity, acting on NAD(P)H, quinone or similar compound as acceptor, aldo-keto reductase (NADP) activity, steroid dehydrogenase activity, acting on the CH-OH group of donors, NAD or NADP as acceptor, indanol dehydrogenase …
PGRMC1	Protein	progesterone receptor membrane component 1	157	Homo sapiens, Mus musculus, Rattus norvegicus	O00264, Q6IB11, O55022, Q3TXU8, P70580, O70606, Q549C4, Q9UGJ9, Q99JN0	MPR, HPR6.6, membrane-associated progesterone receptor component 1, progesterone binding protein, PPMR, Vema, AA415812, RP23-100G16.1, 25Dx, 25-Dx <more data available...>	Proteins Involved in Pathogenesis of Polycystic Ovary Syndrome, Neighbors of neurite outgrowth, Neighbors of cell proliferation, Neighbors of cell migration, Neighbors of apoptosis, Neighbors of cell death, Neighbors of mitosis, Neighbors of cell differentiation, Neighbors of cell growth, Neighbors of cell survival <more data available...>	membrane, integral component of membrane, endoplasmic reticulum membrane, nucleolus, cell surface, endoplasmic reticulum, intracellular membrane-bounded organelle, nucleus	axon guidance	lipid binding, steroid binding, heme binding
TRIM33	Protein	tripartite motif containing 33	128	Homo sapiens, Mus musculus, Rattus norvegicus	B3KN30, Q9UPN9, E9QME5, Q99PP7, E9QP19, O95855, Q5TG72, Q5TG73, Q5TG74, Q9C017 <more data available...>	ECTO, PTC7, RFG7, TF1G, TIF1G, TIFGAMMA, TIF1GAMMA, E3 ubiquitin-protein ligase TRIM33, TIF1-gamma, protein Rfg7 <more data available...>	over expressed, Neighbors of protein ubiquitination, Neighbors of cell proliferation, Neighbors of cell growth, Neighbors of Neoplasms, Neighbors of mitotic spindle checkpoint, Neighbors of mitosis, Neighbors of cell invasion, Neighbors of Carcinoma, Non-Small-Cell Lung, Neighbors of cell differentiation <more data available...>	nucleoplasm, nucleolus, intracellular, intracellular membrane-bounded organelle, nucleus	negative regulation of BMP signaling pathway, regulation of transforming growth factor beta receptor signaling pathway, transforming growth factor beta receptor signaling pathway, negative regulation of transcription, DNA-templated, negative regulation of transcription from RNA polymerase II promoter, regulation of transcription, DNA-templated, transcription, DNA-templated, transcription initiati…	ligase activity, ubiquitin-protein ligase activity, co-SMAD binding, R-SMAD binding, DNA binding, metal ion binding, zinc ion binding
Prostate Cancer	Disease		1305			prostatic sarcoma, prostate carcinogenesis, prostate malignancies, prostate malignancy, prostate metastases, prostate metastasis, prostate sarcoma, prostate sarcomas, prostatic cancerogenesis, prostatic carcinogenesis <more data available...>	Neighbors of Prostate Cancer, breast related, Copy of 'breast related' extended, interaction targetted, interaction, Copy of 'interaction targetted' v1, 'interaction targetted' v1', Relation 1
DNA Damage	Cell Process		1544			DNA Injuries, damage in DNA, damages in DNA, injury of DNA, lesions in deoxyribonucleic acid, lesion in the DNA, damage in deoxyribonucleic acid, lesions of DNA, DNA Injury, deoxyribonucleic acid damage <more data available...>	Ca2+ Toxicity in Alzheimer's Disease, Neurotoxin-Induced Parkinson's Disease, Overview of Mitochondrial Dysfunction in Alzheimer's Disease, Multiple Functions of Estrogen in Mitochondria in Alzheimer's Disease, Pancreatic Beta-cell Destruction in Diabetes Mellitus Type 1, MITF as a Regulator of Melanoma Cell Development, Melanoma Overview, Cell Death Mediated by Cytotoxic Cells, Myocardial Ischem…
transcription activation	Cell Process		2393			transcription activation, activation of transcription, transcription upregulation, upregulation of transcription, transcription up-regulation, transcriptional upregulation, up-regulation of transcription, transcriptional activation, transcriptional up-regulation	Neighbors of transcription activation, Hippo-contra 1_hit_1w vs Sham up, New Combined Pathway Hippo-contra 3_hit_48h vs Sham down, New Combined Pathway Hippo-contra 3_hit_1w vs Sham/Hippo-contra 3_hit_1w vs Sham down, clust 1 suppl 5, Relation 1
malignant transformation	Disease		900			malignant transformation, malignant degeneration, carcinomatous degeneration	Neighbors of malignant transformation, breast related, Copy of 'breast related' extended, New Combined Pathway Hippo-contra 3_hit_1w vs Sham/Hippo-contra 3_hit_1w vs Sham down, group A, Atrue, Relation 1
calcitriol	Small Molecule		1731			citrihexal, 1alpha,25(OH)2D3, 1,25 dihydroxy cholecalciferol, 1,25D, 1,25D3, 125338-24-1, 66772-14-3, 1-hydroxylated 25-hydroxyvitamin-D3, 1,25 dihydrocholecalciferol, 1alpha,25(OH)(2)-vitamin D(3) <more data available...>	Prostate Cancer Overview, Impaired Osteoblast Function in Gout, Biosynthesis of cholesterol, Copy of 'Prostate Cancer Overview', PPI with vit D and Rec, Relation 1
prostate carcinoma	Disease		197			prostatic carcinomatosis, carcinomatous prostatic, carcinomatous prostate, prostate carcinoma, prostate carcinomas, prostate carcinomata, prostatic carcinomas, prostatic carcinomata, prostate gland carcinoma, prostatic duct carcinoma <more data available...>	Neighbors of prostate carcinoma, interaction targetted, Copy of 'interaction targetted' v1, 'interaction targetted' v1', Relation 1
25(OH)D3	Small Molecule		197			Hidroferol, EINECS 242-990-9, didrogyl, devisol 25, Delakmin, Dedrogyl, Calderol, RO 8-8892, Calcifediolum, 9,10 secocholesta 5,7,10(19) triene 3beta,25 diol <more data available...>	Biosynthesis of cholesterol, Relation 1

## Sheet: Relation and  references 
Supplemental Table S4: Pathway Studios gene-gene interaction association with Disease and Function
Relation	Organ	Type	Sentence	TextRef	Connectivity	# of References	Owner	Found In Pathways	bindng
BRCA2 ---> Prostate Cancer	Breast {Organ urn:agi-ncimorgan:C0006141}, Ovary {Organ urn:agi-ncimorgan:CL384202}	Regulation	Inherited mutations in the BRCA2 gene are also known to cause susceptibility to prostate cancer., Rare mutations in genes such as BRCA1, BRCA2 and HOXB13 can affect prostate cancer incidence and/or clinical behaviour., Thus, the BRCA-2 locus does not appear to play as important a role in clinically localized prostate cancer as the retinoblastoma and/or DBM loci., BRCA1 and BRCA2 are tumor suppres…	info:pmid/12083779#abs:2, info:pmid/22974436#abs:3, info:pmid/9815575#abs:6, info:pmid/10023017#abs:1, info:pmid/12474142#abs:7, info:pmid/12083780#body:3, info:pmid/20711217#cont:406, info:pmid/12187189#body:109, info:pmid/15234240#body:114, info:pmid/23747895#cont:59 <more data available...>	2	12		Neighbors of Prostate Cancer, Relation 1
JUN ---> transcription activation	liver parenchyma {Organ urn:agi-ncimorgan:C0736268}, Liver {Organ urn:agi-ncimorgan:CL384198}, Cervix Uteri {Organ urn:agi-ncimorgan:C1278987}, Kidney {Organ urn:agi-ncimorgan:C1278978}, neuromere {Organ urn:agi-organ:neuromere}, Heart {Organ urn:agi-ncimorgan:C1281570}, Thymus Gland {Organ urn:agi-ncimorgan:C1306748}, Testis {Organ urn:agi-ncimorgan:C1278981}, myometrium {Organ urn:agi-ncimorgan…	Regulation	The JNK pathway activation c-Jun leads to transcriptional activation of many genes., In this report we show that CREM antagonists are able to block the transcriptional activation elicited by c-Jun., This finding suggests that the c-FOS/c-JUN dimer is required for transcriptional activation of the Aanat gene., These convergent data suggest that c-Jun is involved in transcriptional activation throu…	info:pmid/21702955#abs:13, info:pmid/1429597#abs:5, info:pmid/16687308#abs:5, info:pmid/8840008#abs:7, info:pmid/15737994#abs:11, info:pmid/8384355#abs:4, info:pmid/19924227#abs:6, info:pmid/8035787#abs:3, info:pmid/7745608#abs:6, info:pmid/20508969#abs:4 <more data available...>	2	100		Neighbors of transcription activation, Relation 1
BRCA2 ---> DNA Damage	Skin {Organ urn:agi-ncimorgan:C0684084}, Pancreas {Organ urn:agi-ncimorgan:C1278931}, Cardiovascular system {Organ urn:agi-ncimorgan:C1269562}, Heart {Organ urn:agi-ncimorgan:C1281570}, Breast {Organ urn:agi-ncimorgan:C0006141}, Germinal Layer {Organ urn:agi-ncimorgan:C1708239}	Regulation	The BRCA1 and BRCA2 gene products are thought to play important roles in the processing of DNA damage., Disruption of these BRCA2 interactions by cancer-associated mutations results in increased cytokinetic defects but has no effect on BRCA2-dependent homologous recombination repair of DNA damage., Recent studies have provided evidence that breast cancer susceptibility gene products (Brca1 and Br…	info:pmid/11807777#abs:1, info:pmid/22771033#abs:5, info:pmid/11278964#abs:1, info:pmid/16818684#abs:9, info:pmid/17083915#body:11, info:pmid/15671039#body:128, info:pmid/21483806#cont:117, info:pmid/21798026#cont:17, info:pmid/21455033#cont:149, info:pmid/22309939#cont:16 <more data available...>	2	26		Neighbors of DNA Damage, Relation 1
PDPK1 --+> transcription activation		Regulation	Etoposide activated NF-kB through PI3-kinase/Akt, and the transcription activation domain of p65 was further activated by wild-type PDK-1., Although ablation of daf-2 or pdk-1 completely suppressed akt-1-dependent apoptosis, the transcriptional activation of CEP-1 was unaffected, suggesting that daf-2 and pdk-1 act independently or downstream of cep-1 and akt-1., PDK1 coexpression enhanced the C?…	info:pmid/16267399#abs:6, info:pmid/22935616#abs:5, info:pmid/12139971#body:125, info:pmid/17327236#body:403	2	4		Neighbors of transcription activation, Relation 1
VDR ---| DNA Damage	Colon {Organ urn:agi-ncimorgan:C1281569}, Breast {Organ urn:agi-ncimorgan:C0006141}	Regulation	Conversely, deletion of the VDR gene in mice alters the balance between proliferation and apoptosis, increases oxidative DNA damage, and enhances susceptibility to carcinogenesis in these tissues., VDR-induced DNA damage has also been shown to be independent of p53 status, and is p73 dependent.28, We hypothesized that if HIV-induced down-regulation of VDR and associated downstream signaling was c…	info:pmid/22085499#abs:6, info:pmid/22536770#abs:6, info:pmid/21046823#cont:50, info:pmid/23390308#cont:383, info:pmid/23941729#body:98, info:doi/10.1016/j.abb.2011.10.019#body:110	2	6		Relation 1
VDR ---> transcription activation	Fingers {Organ urn:agi-ncimorgan:C0016129}, Kidney {Organ urn:agi-ncimorgan:C1278978}, Bone and Bones {Organ urn:agi-ncimorgan:C0262950}, Renal Tubule {Organ urn:agi-ncimorgan:CL355448}, Pituitary Gland {Organ urn:agi-ncimorgan:C1278880}, Hair {Organ urn:agi-ncimorgan:CL384196}, Limb {Organ urn:agi-ncimorgan:C0015385}, Endocrine system {Organ urn:agi-ncimorgan:C1280975}, Central Nervous System {O…	Regulation	This indicated that transcriptional activation was mediated indirectly by the vitamin D receptor (VDR)., Our study demonstrated that CDK11(p58) interacted with VDR and repressed VDR-dependent transcriptional activation., Transient expression of CCAAT displacement protein potentiated VDR-mediated transcriptional activation in HOS cells., In contrast, glucocorticoid receptor P/D-box mutant human vi…	info:pmid/11042697#abs:6, info:pmid/19538938#abs:4, info:pmid/19888899#abs:8, info:pmid/7575575#abs:4, info:pmid/11948698#abs:10, info:pmid/19702536#abs:5, info:pmid/7981122#abs:3, info:pmid/9632111#abs:2, info:pmid/11801650#abs:7, info:pmid/15528275#abs:3 <more data available...>	2	72		Relation 1
RAD18 --+> DNA Damage	Dermis {Organ urn:agi-ncimorgan:C0011646}, Skin {Organ urn:agi-ncimorgan:C0684084}, Fingers {Organ urn:agi-ncimorgan:C0016129}	Regulation	Together, our data uncovers RAD18 as a key factor that orchestrates homologous recombination repair through surveillance of the DNA damage signal., It is well-established that Rad18 promotes FA pathway activation and DNA damage tolerance in response to bulky DNA lesions via a mechanism involving PCNA monoubiquitination., Using synchronized cultures of primary human cells, we defined cell cycle st…	info:pmid/19396164#abs:6, info:pmid/21478670#abs:7, info:pmid/23295675#abs:2, info:pmid/18341034#title:1, info:pmid/22036607#title:1, info:pmid/24465179#cont:22, info:pmid/17094943#body:7, info:pmid/21551069#cont:171, info:pmid/21799021#cont:295, info:pmid/20930510#cont:88 <more data available...>	2	26		Neighbors of DNA Damage, Relation 1
CLOCK ---> transcription activation	Blood Vessels {Organ urn:agi-ncimorgan:C0005847}, Liver {Organ urn:agi-ncimorgan:CL384198}, suprachiasmatic nucleus {Organ urn:agi-ncimorgan:C0038866}, Duodenum {Organ urn:agi-ncimorgan:C1278921}, Brain {Organ urn:agi-ncimorgan:C1269537}, anterior hypothalamus {Organ urn:agi-ncimorgan:C0020664}, Heart {Organ urn:agi-ncimorgan:C1281570}, Limb {Organ urn:agi-ncimorgan:C0015385}	Regulation	These interactions negatively regulate CLOCK/MOP4:BMAL1-mediated transcriptional activation of clock gene expression in vascular cells., Ketamine modulates CLOCK:BMAL1-mediated transcriptional activation when these regulators are ectopically expressed in NG108-15 neuronal cells., CLOCK drives transcriptional activation of Lpl, Activation of transcription at these promoters is mediated by BMAL1 an…	info:pmid/11439184#abs:4, info:pmid/21887357#abs:3, info:pmid/22562834#cont:327, info:pmid/21536041#body:44, info:pmid/23452856#body:175, info:pmid/17451793#body:149, info:pmid/20551177#body:241, info:pmid/23376737#body:213, info:pmid/20691738#body:68, info:pmid/17344391#body:54 <more data available...>	2	51		Neighbors of transcription activation, Relation 1
JUN ---> malignant transformation	Kidney Glomerulus {Organ urn:agi-ncimorgan:C0022663}	Regulation	We conclude that deregulated expression of human c-jun can participate in malignant transformation of normal mammalian cells., The proto-oncogene C-jun acts as a transcriptional activator or repressor for numerous cellular genes, and the overexpression of these genes may cause malignant transformation., The c-fos and c-jun protooncogenes act as transcriptional activator for numerous cellular gene…	info:pmid/2648396#abs:8, info:pmid/1404666#abs:1, info:pmid/8777434#abs:2, info:pmid/11000521#body:132, info:pmid/21640077#body:79, info:pmid/24315690#body:41, info:pmid/24444534#body:149, info:pmid/17316817#body:208	2	8		Neighbors of malignant transformation, Relation 1
CEBPD ---> transcription activation		Regulation	However, the different C/EBP delta domains involved in IL-1 beta-mediated transcriptional activation and the kinases implicated have not been properly defined., We observed that stress regulated transcription activation of nuclear genes involves a cooperative interplay between NFkappaB (cRel:p50), C/EBPdelta, CREB, and NFAT., Promoter analysis demonstrates that the C/EBPdelta promoter fragment in…	info:pmid/15694370#abs:3, info:pmid/20153290#abs:6, info:pmid/10867011#abs:4, info:pmid/12857754#abs:7, info:pmid/21143913#cont:199, info:pmid/11796503#body:350, info:pmid/9845337#body:8, info:pmid/9395525#body:273, info:pmid/23993701#body:178, info:doi/10.1016/S1072-7515(00)00471-3#body:11 <more data available...>	2	11		Neighbors of transcription activation, clust 1 suppl 5, Relation 1
ACSL1 ---> transcription activation		Regulation	In the present study, we elucidated one more known interaction between Sp1 and SREBP2 is regulated by O-GlcNAc and suggest a possibility that O-GlcNAc affects expression of lipogenic genes, some of which, including Acetyl-CoA synthetase 1, Sp1 and SREBP2 play a role in transcription activation of.	info:pmid/20138838#body:75	2	1		Neighbors of transcription activation, Relation 1
H2AFX --+> DNA Damage	Descending colon {Organ urn:agi-ncimorgan:C0227389}, Brain {Organ urn:agi-ncimorgan:C1269537}, Ovary {Organ urn:agi-ncimorgan:CL384202}, Testis {Organ urn:agi-ncimorgan:C1278981}, Face {Organ urn:agi-ncimorgan:CL414270}, Retina {Organ urn:agi-ncimorgan:C1962966}, Skeletal system {Organ urn:agi-ncimorgan:C1283922}, Hippocampus {Organ urn:agi-ncimorgan:C0019564}, Liver {Organ urn:agi-ncimorgan:CL38…	Regulation	These data suggest that monoubiquitination of H2AX plays a critical role in initiating DNA damage signaling., Plotting ?-H2AX foci versus blood dose showed a systematic increase of DNA damage with dose., Notably, only ganciclovir produced a late and persistent increase in ?-H2AX foci demonstrating the induction of unrepairable DNA damage., Here, we will review recent advances in our understanding…	info:pmid/21676867#abs:7, info:pmid/21596504#abs:7, info:pmid/21869826#abs:5, info:pmid/20493860#abs:5, info:pmid/15632067#abs:10, info:pmid/22237206#abs:5, info:pmid/21184737#abs:7, info:pmid/16552174#abs:1, info:pmid/20580854#abs:1, info:pmid/22101936#abs:2 <more data available...>	2	91		Neighbors of DNA Damage, Relation 1
CTSD --+> Prostate Cancer		Regulation	Recently, using a retroviral approach, cathepsin D-overexpression was also found to be involved in two other cell model by increasing NIH3T3 soft agar colony formation and the progression of LNCAP human prostate cancer .	info:pmid/10675721#body:28	2	1		Neighbors of Prostate Cancer, Relation 1
JAG1 ---> transcription activation	Aorta {Organ urn:agi-ncimorgan:C1278934}	Regulation	In contrast, overexpression of the C455R mutation (hN3 C455R) resulted in strongly impaired Jagged1-induced transcriptional activation., Interestingly, caN1-mediated transcriptional activation of a CAT reporter linked to the HES1 promoter containing the CSL/Notch response element was partially inhibited in the soluble Jagged 1, dnN1, and dnN2 stable transfectants (Fig. 3B).	info:pmid/15350543#body:84, info:pmid/11427524#body:160	2	2		Neighbors of transcription activation, Relation 1
DDB2 ---> DNA Damage	Cornea {Organ urn:agi-ncimorgan:C1550625}	Regulation	Loss of BRCA1-dependent DDB2 repair function may contribute to cancer susceptibility and cellular sensitivity to DNA damage., Here we show that the p21(Waf1/Cip1) -regulatory function of DDB2 plays a central role in defining the response (apoptosis or arrest) to DNA damage., The expression of damaged DNA binding gene DDB2 involved in the DNA lesion recognition step was elevated in the Rb family-d…	info:pmid/12170778#abs:8, info:pmid/19541625#abs:3, info:pmid/19376752#abs:5, info:pmid/21388382#abs:1, info:pmid/11971958#abs:2, info:pmid/12509284#body:269, info:pmid/22492724#title:1, info:pmid/23208375#cont:173, info:pmid/18769455#body:117, info:pmid/21419216#body:13 <more data available...>	2	17		Neighbors of DNA Damage, Relation 1
TGFBR2 ---> transcription activation	Bone and Bones {Organ urn:agi-ncimorgan:C0262950}	Regulation	In an attempt to determine why TßRII expression alone induces transcriptional activation, we have performed experiment to block endogenous and exogenous TGF-ß effect by a TGF-ß receptor kinase inhibitor (SB-431542) (Halder et al, 2005)., Similar to the observations on TGF-ß signaling and its dependence on TßRI/TßRII coexpression, joint expression of type I and type II bone morphogenetic protein r…	info:pmid/16251876#body:229, info:pmid/22293501#body:136, info:doi/10.1016/j.febslet.2012.01.040#body:136	2	3		Neighbors of transcription activation, Relation 1
JUN ---> prostate carcinoma		Regulation	In human prostate carcinoma DU145 cells, the inhibition of MMP-2 and MMP-9 by Epigallocatechin gallate is mediated via inhibition of phosphorylation of ERK1/2 and p38, and inhibition of activation of the transcription factors c-jun and Nuclear Factor Kappa B [17]., Studies of prostate carcinoma cell lines have shown that c- jun amplification may play a role in de novo drug resistance and that c- …	info:pmid/23293884#cont:29, info:pmid/16413376#body:12	2	2		Relation 1
TGFBR2 ---> Prostate Cancer	Prostate {Organ urn:agi-ncimorgan:C1278980}	Regulation	Loss of TGF-ß type II receptor (TßRII, encoded by Tgfbr2) expression in the prostate stroma contributes to prostate cancer initiation, progression, and invasion., It has been previously hypothesized that the loss of expression of TGFß-RI and TGFß-RII may be a critical event during prostate carcinogenesis, leading to resistance to the growth-inhibitory effect of TGF-ß 1 and, later, to overexpressi…	info:pmid/22290877#abs:1, info:pmid/15183988#body:85	2	2		Neighbors of Prostate Cancer, Relation 1
AKAP12 ---> Prostate Cancer	Lung {Organ urn:agi-ncimorgan:C1278908}, Prostate {Organ urn:agi-ncimorgan:C1278980}	Regulation	Src-suppressed C kinase substrate maps to 6q24-q25.2 and was found to suppress prostate cancer metastasis when over-expressed., We hypothesized that inactivation of the AKAP12 gene through CpG methylation could be responsible for the pathogenesis and progression of Prostate cancer.	info:pmid/18280770#body:154, info:pmid/21310466#body:13	2	2		Neighbors of Prostate Cancer, Relation 1
ECT2 --+> malignant transformation		Regulation	DISCUSSION TOP ABSTRACT INTRODUCTION EXPERIMENTAL PROCEDURES RESULTS DISCUSSION REFERENCES In the present study, we characterized the malignant transformation induced by the human ECT2 protooncogene., In fact, disruption to the normal localization of regulatory GEF proteins may be a more general feature in transformed cells because misdistribution of ECT2 results in ectopic activation of RhoA and…	info:pmid/14645260#body:371, info:pmid/17631191#body:390	2	2		Neighbors of malignant transformation, Relation 1
ANXA2 ---> Prostate Cancer	Gland {Organ urn:agi-ncimorgan:C1285092}, Intestines {Organ urn:agi-ncimorgan:C0021853}, Prostate {Organ urn:agi-ncimorgan:C1278980}	Regulation	Annexin II may also facilitate the growth of prostate cancer in vitro and in vivo by the MAPK pathway., Our findings suggest that the use of sustained-release polymeric nanoparticles for down-regulation of annexin A2 expression may serve as an effective adjuvant treatment option for prostate cancer., This report is the first to demonstrate the interaction of AnxA2 with STAT6 and suggests a possib…	info:pmid/18636554#abs:8, info:pmid/19452941#abs:9, info:pmid/20121258#abs:9, info:pmid/18924133#abs:10, info:pmid/22223826#abs:3, info:pmid/24239898#body:26, info:pmid/18242387#body:87, info:pmid/24591759#cont:311, info:pmid/19513064#body:220	2	9		Neighbors of Prostate Cancer, Relation 1
ZNF143 ---> transcription activation	Fingers {Organ urn:agi-ncimorgan:C0016129}, Ovary {Organ urn:agi-ncimorgan:CL384202}	Regulation	Transcriptional activation of FKS2 was dependent on the Swi4/Swi6 (SBF) transcription factor and on an activating signal to Mpk1 but not on protein kinase activity., Since then, Staf has also been involved in transcriptional activation of snRNA2 and snRNA-type genes (2, 3)., The repressive effects of Whi5 on SBF/MBF-mediated transcriptional activation ( ) could be required to prevent premature fi…	info:pmid/18268013#abs:3, info:pmid/17092945#body:56, info:pmid/16387649#body:123, info:pmid/15210110#body:92, info:pmid/22333912#cont:271, info:pmid/23152058#cont:27, info:pmid/9705341#body:230, info:pmid/21855792#body:17, info:pmid/18586536#body:13, info:pmid/9009278#body:42 <more data available...>	2	14		Neighbors of transcription activation, Relation 1
VDR ---> Prostate Cancer	Prostate {Organ urn:agi-ncimorgan:C1278980}, Breast {Organ urn:agi-ncimorgan:C0006141}	Regulation	Nuclear receptors , including the Androgen Receptor and the Vitamin D Receptor (VDR), play an important role in prostate cancer etiology., The results indicate that the BsmI polymorphism in the VDR gene plays a significant role in protection against prostate cancer and benign prostatic hyperplasia., Low levels of vitamin D are implicated as a potential risk factor for prostate cancer, and the vit…	info:pmid/22473304#abs:1, info:pmid/10667581#abs:7, info:pmid/24120391#abs:1, info:pmid/20347977#title:1, info:pmid/15050735#body:12, info:pmid/22193519#cont:263, info:pmid/20711217#cont:406, info:pmid/15225811#body:2, info:doi/10.1530/ERC-12-0381#cont:713	2	9		Relation 1
BTG2 ---> transcription activation		Regulation	In fact, BTG1 and BTG2 modulate the estrogen receptor -mediated transcriptional activation through this LXXLL motif ( )., The leukemia-associated protein Btg1 and the p53-regulated protein Btg2 interact with the homeoprotein Hoxb9 and enhance its transcriptional activation.	info:pmid/15664454#body:24, info:pmid/10617598#title:1, info:doi/10.1007/978-1-4419-6673-5_1#cont:420	2	3		Neighbors of transcription activation, Relation 1
BRCA2 ---> malignant transformation		Regulation	CAPAN-1 cells have been useful for studying how BRCA2 mutations contribute to malignant transformation., BRCA2 dysfunction promotes malignant transformation of pancreatic intraepithelial neoplasia., However, loss of BRCA2 function leads to cell death, and secondary mutations in genes such as those involved in the spindle assembly checkpoint are required for malignant transformation.	info:pmid/18940471#abs:2, info:pmid/22934697#title:1, info:pmid/12376200#body:169, info:doi/10.2174/1871520611313020012#cont:309	2	4		Neighbors of malignant transformation, Relation 1
JUN ---> DNA Damage	Intestines {Organ urn:agi-ncimorgan:C0021853}	Regulation	PrxII Knockdown Results in a Defect in DNA Repair—Recent reports have shown that c-Jun and ATF play a protective role in DNA damage by inducing the genes involved in the DNA repair process (36, 37)., Although our present findings support the notion that c-Jun is induced/activated and required for death following DNA damage, the importance of individual JNK members, in particular JNK3, was unclear…	info:pmid/21148313#cont:262, info:pmid/12091388#body:319, info:pmid/15068823#body:139, info:pmid/17823615#body:20, info:pmid/12684520#body:179	2	5		Neighbors of DNA Damage, Relation 1
DUSP1 ---> malignant transformation	Stomach {Organ urn:agi-ncimorgan:C1278920}	Regulation	The prediction that under-expressing MKP-1 will cause malignant transformation is a consequence of MKP-1's role as a phosphatase for ERK.	info:pmid/15620513#body:226	2	1		Neighbors of malignant transformation, Relation 1
TGFBR2 ---> malignant transformation	Intestines {Organ urn:agi-ncimorgan:C0021853}, Prostate {Organ urn:agi-ncimorgan:C1278980}	Regulation	Thus, loss of TGFBR2 in intestinal epithelial cells promotes the invasion and malignant transformation of tumors initiated by Apc mutation, providing evidence that Wnt signaling deregulation and TGF-beta signaling inactivation cooperate to drive the initiation and progression, respectively, of intestinal cancers in vivo., It has been reported that the loss of TGFßRII in intestinal epithelial cell…	info:pmid/17047044#abs:8, info:pmid/20565851#body:146, info:pmid/16362038#body:67, info:pmid/11707452#body:271, info:pmid/19503063#body:132, info:doi/10.1016/j.ejca.2004.12.027#body:82	2	6		Neighbors of malignant transformation, Relation 1
KIAA0101 ---> DNA Damage		Regulation	Consequently, PAF15 prevents cell death normally trigged by UV-induced DNA damage, resulting in genetic instability and possible tumourigenisis., The stabilization of PCNA-associated factor of 15 kDa by PCNA might play a role during late G1 or upon DNA damage, when PCNA-associated factor of 15 kDa has been suggested to cooperate with PCNA, yet APC/C is active ( ).	info:pmid/24631643#body:84, info:pmid/21700221#body:191	2	2		Neighbors of DNA Damage, Relation 1
SP4 ---> transcription activation	Fingers {Organ urn:agi-ncimorgan:C0016129}	Regulation	Sp1, Sp3, and specificity protein4 contain two major glutamine-rich domains thought to be responsible for transcriptional activation, while Sp2 contains only one .	info:pmid/15706661#body:12	2	1		Neighbors of transcription activation, Relation 1
TRIM33 ---| transcription activation		Regulation	We propose that TIF1? continuously opposes Smad-induced transcriptional activation using just such a mechanism.	info:pmid/21726812#body:163	2	1		Neighbors of transcription activation, Relation 1
MTF1 ---> transcription activation	Endoderm {Organ urn:agi-ncimorgan:C0014144}	Regulation	Here we review recent advances in our understanding of MTF-1 regulation with a focus on the mechanism underlying heavy metal responsiveness and transcriptional activation mediated by mammalian or Drosophila MTF-1., The above results had suggested that the C-terminal segment of MTF-1 inhibits a constitutive transcriptional activation domain., Whereas nuclear localization of MTF-1 is necessary for …	info:pmid/22289350#abs:4, info:pmid/22138226#body:103, info:pmid/11306562#body:245, info:pmid/11230134#body:94, info:pmid/14610091#title:1, info:pmid/16751183#body:168, info:pmid/15142038#body:325, info:pmid/17433784#body:153	2	8		Neighbors of transcription activation, Relation 1
calcitriol --+> VDR	Prostate {Organ urn:agi-ncimorgan:C1278980}, Duodenum {Organ urn:agi-ncimorgan:C1278921}, Intestines {Organ urn:agi-ncimorgan:C0021853}, Aorta {Organ urn:agi-ncimorgan:C1278934}, Parathyroid gland {Organ urn:agi-ncimorgan:C0496943}, Colon {Organ urn:agi-ncimorgan:C1281569}, Skin {Organ urn:agi-ncimorgan:C0684084}, Bone and Bones {Organ urn:agi-ncimorgan:C0262950}, Kidney {Organ urn:agi-ncimorgan:…	Expression	1,25(OH)2D3 induces gene expression through the VDR., Hairless repressed VDR transactivation induced by both 1,25(OH)(2)D(3) and lithocholic acid., Interestingly, bufalin enhanced 1,25(OH)(2)D(3)-induced nuclear VDR expression., insulin receptor and VDR mRNA expression was increased with 1,25(OH)2 D3 treatment., However, SP600125 did not affect 1,25(OH)(2)D(3)-induced transactivation of the DR3 v…	info:pmid/15647825#abs:1, info:pmid/22466564#abs:7, info:pmid/19429444#abs:6, info:pmid/23929734#abs:7, info:pmid/15205382#abs:7, info:pmid/17959142#abs:8, info:pmid/19692484#abs:1, info:pmid/9209684#abs:7, info:pmid/21458521#abs:1, info:pmid/15598784#abs:11 <more data available...>	2	100		PPI with vit D and Rec, Relation 1
calcitriol --+> VDR	Lung {Organ urn:agi-ncimorgan:C1278908}, Pancreas {Organ urn:agi-ncimorgan:C1278931}, Hair {Organ urn:agi-ncimorgan:CL384196}, Kidney {Organ urn:agi-ncimorgan:C1278978}, Skin {Organ urn:agi-ncimorgan:C0684084}, Cardiovascular system {Organ urn:agi-ncimorgan:C1269562}, ileum {Organ urn:agi-ncimorgan:C1278923}, Aorta {Organ urn:agi-ncimorgan:C1278934}, Prostate {Organ urn:agi-ncimorgan:C1278980}, S…	DirectRegulation	The comparator was calcitriol, a non-selective vitamin D receptor activator medication., The vitamin D metabolite 1,25(OH)2D is the bioactive ligand of the vitamin D receptor (VDR)., Resistance to maturation depended on the presence of the 1alpha,25(OH)(2)D(3) receptor (VDR)., 1,25-Dihydroxyvitamin D(3) (1,25(OH)(2)D(3)) is the biologically active ligand for the vitamin D receptor (VDR)., R274 is…	info:pmid/19335321#abs:3, info:pmid/20307661#abs:1, info:pmid/11371626#abs:6, info:pmid/18509362#abs:1, info:pmid/22145479#abs:8, info:pmid/8164684#abs:7, info:pmid/16675575#abs:1, info:pmid/20064609#abs:1, info:pmid/20860424#abs:4, info:pmid/23906633#abs:9 <more data available...>	2	100		Prostate Cancer Overview, Impaired Osteoblast Function in Gout, Copy of 'Prostate Cancer Overview', Relation 1
calcitriol --+> VDR	Fetal Lung {Organ urn:agi-ncimorgan:C1517163}, Bone Marrow {Organ urn:agi-ncimorgan:C0005953}, Mesenchyme {Organ urn:agi-ncimorgan:C0162415}, Prostate {Organ urn:agi-ncimorgan:C1278980}	MolTransport	Our earlier studies suggested that calcitriol induces translocation of cytoplasmic VDR, but the physiologic relevance of this finding remained uncertain., Short treatment with 1a,25(OH)(2)D(3) induces reverse translocation of the VDR from the nucleus to plasma membranes., First, we demonstrated that human fetal lung -1 cells express the vitamin D receptor (VDR) and that vitamin D, 25-hydroxyvitam…	info:pmid/10383447#abs:2, info:pmid/21664245#abs:3, info:pmid/23941558#abs:5, info:pmid/22899855#abs:6, info:pmid/20371703#abs:4, info:pmid/18427562#abs:6, info:pmid/19036760#abs:6, info:pmid/19074549#body:145, info:pmid/22531461#body:82, info:pmid/12145331#body:367 <more data available...>	2	19		Relation 1
BTG2 ---> DNA Damage		Regulation	BTG2 increases breast cancer cell DNA damage after irradiation., Identification of BTG2, an antiproliferative p53-dependent component of the DNA damage cellular response pathway., Cdkn1a, Bax, and Btg2 are antiproliferative p53-dependent components of the DNA damage cellular response pathway ., These data suggest that the expression of TIS21 might regulate the transmission of the DNA damage signa…	info:pmid/24308156#cont:202, info:pmid/8944033#title:1, info:pmid/21606506#cont:681, info:pmid/20399889#body:87, info:pmid/18356920#body:350, info:pmid/23089312#body:98, info:pmid/10821843#body:149	2	7		Neighbors of DNA Damage, Relation 1
JAG1 ---> Prostate Cancer	Prostate {Organ urn:agi-ncimorgan:C1278980}, Bone and Bones {Organ urn:agi-ncimorgan:C0262950}	Regulation	These results suggest that Jagged-1 could be a potential therapeutic target for the treatment of prostate cancer., Recent data from our group support this model, showing that Jagged-1 expression increases dramatically in high grade and metastatic prostate cancers compared to primary lesions ., Thus, we speculate that enhanced JAG1 might contribute, to some extent, to the growth-promoting effects …	info:pmid/16823852#abs:6, info:pmid/23973264#body:36, info:pmid/21224847#cont:296	2	3		Neighbors of Prostate Cancer, Relation 1
JUN --+> VDR	Colon {Organ urn:agi-ncimorgan:C1281569}, Small Intestinal Mucosa {Organ urn:agi-ncimorgan:CL321208}	PromoterBinding	Here we show that c-Jun is essential for VDR expression and VDR in turn inhibits c-Jun-dependent cell death by non-classical mechanisms., In addition, c-Jun binds to the promoter of the VDR gene and induces its transcription , consistent with the VDR functioning in a negative feedback loop to inhibit Jun activity., But, there is no evidence for the existence of EREs within the promoter of the VDR…	info:pmid/17121851#abs:3, info:pmid/23911725#body:64, info:pmid/20186393#cont:223, info:pmid/15930183#body:342	2	4		PPI with vit D and Rec, Relation 1
VDR ---> JUN		Regulation	Existence of the non-classical VDR pathway was suggested by a requirement of both c-Jun and VDR in stress-induced VDR activity and further demonstrated by VDR inhibiting c-Jun-dependent cell death independent of its classical transcriptional activity and independent of vitamin D(3). c-Jun is also required for vitamin D(3)-induced classical VDR transcriptional activity by a mechanism likely involv…	info:pmid/17121851#abs:6, info:pmid/23572530#cont:362, info:pmid/17401435#body:200, info:pmid/11026565#body:117, info:pmid/10330159#title:1, info:doi/10.1016/j.canlet.2007.02.013#body:156	2	6		PPI with vit D and Rec, Relation 1
JUN ---> Prostate Cancer	Fetus {Organ urn:agi-ncimorgan:C1305737}	Regulation	Disrupting PAGE4/c-Jun interactions using small molecules may represent a novel therapeutic strategy for prostate cancer., Down-regulation or over-expression of SENP1, c-Jun or androgen receptor inhibited Triptolide anti-prostate cancer efficacy	info:pmid/24263171#abs:11, info:pmid/22666381#cont:239	2	2		Neighbors of Prostate Cancer, Relation 1
ESPL1 --+> malignant transformation		Regulation	A disrupted function of separase has been shown to cause genomic instability and promote epithelial malignant transformation and tumorigenesis .	info:pmid/21504706#body:194	2	1		Neighbors of malignant transformation, Relation 1
G6PD ---| DNA Damage	Hippocampus {Organ urn:agi-ncimorgan:C0019564}	Regulation	Glucose-6-phosphate dehydrogenase (G6PD) protects the embryo from endogenous and xenobiotic-enhanced oxidative DNA damage and embryopathies., By contrast, knockdown of G6PD protein at late reperfusion period (48-96 h) increased oxidative DNA damage and exacerbated the ischemia-induced neuronal cell death in hippocampal CA1 region, an effect associated with reduced NADPH level and GSH/GSSG ratio.	info:pmid/23672460#abs:1, info:pmid/22580330#abs:5	2	2		Neighbors of DNA Damage, Relation 1
DDB2 ---> Prostate Cancer		Regulation	Hence DDB2 may be a potential regimen for prostate cancer treatment, especially in androgen-refractory patients harboring high amount of androgen receptor who cannot be cured by androgen ablation.	info:pmid/22846800#abs:6	2	1		Neighbors of Prostate Cancer, Relation 1
BRIP1 ---> DNA Damage		Regulation	It seems then that FANCJ, like other Fanconi anemia proteins, operates during S-phase to facilitate replication through DNA damage and also 'difficult' DNA sequences., RNA interference of FANCJ results in delayed entry into the S phase of the cell cycle and increased activation of DNA damage checkpoints and genomic instability ., This resembles the situation in FANCJ-deficient cells (Fig. 5), and…	info:pmid/20122882#body:154, info:pmid/18708164#body:5, info:pmid/21115814#body:134, info:pmid/20676667#cont:26, info:pmid/19419957#body:352	2	5		Neighbors of DNA Damage, Relation 1
VDR ---> DUSP1		PromoterBinding	After treatment with vitamin D, a significant increase in VDR binding to this region of the MKP-1 gene promoter was observed (p < 0.01)., In a recent study, vitamin D3 increased VDR binding to a putative vitamin D response element in MKP-1 promoter and upregulated MKP-1 expression, which led to the inhibition of LPS-induced p38 mitogen-activated protein kinase phosphorylation and cytokine product…	info:pmid/23572530#cont:150, info:pmid/23637889#cont:223, info:pmid/24418482#body:155	2	3		Relation 1
DUSP1 ---> VDR		Expression	MKP-1 is necessary for maximal genomic expression of 1,25-(OH)2D3 target genes RANKL, VDR, and CYP24a1.	info:pmid/22899855#cont:133	2	1		Relation 1
DUSP1 ---> VDR	Bone Marrow {Organ urn:agi-ncimorgan:C0005953}	MolTransport	MKP-1 is required for 1,25-(OH)2D3-induced nuclear translocation of the VDR-retinoid X receptora heterodimer., Interestingly, our group has also showed that deletion of Dusp-1 resulted in less OCs as a result of reduced Vitamin D-induced RANKL expression in bone marrow stromal populations due to impaired RXR/VDR heterodimer nuclear translocation .	info:pmid/22899855#cont:230, info:pmid/24269279#body:225	2	2		PPI with vit D and Rec, Relation 1
HSPA8 ---- VDR		Binding	Escherichia coli-expressed VDR binds DnaK (bacterial Hsp70), DnaJ (bacterial Hsp40) and eukaryotic Hsc70 .	info:pmid/18182164#body:11	2	1		PPI with vit D and Rec, Relation 1
calcitriol ---> 25(OH)D3	Liver {Organ urn:agi-ncimorgan:CL384198}, Kidney {Organ urn:agi-ncimorgan:C1278978}, Parathyroid gland {Organ urn:agi-ncimorgan:C0496943}	MolSynthesis	Previous studies have suggested that hepatic production of 25-hydroxyvitamin D3 may be suppressed by 1alpha,25-dihydroxyvitamin D3., Although 1,25-dihydroxyvitamin D3 (1,25-(OH)2D3) regulates the renal metabolism of 25-hydroxyvitamin D3 (25-OH-D3), the mechanism is not well understood., These results clearly demonstrate that 1,25-dihydroxycholecalciferol, but not oestrogen, acts directly on the k…	info:pmid/16690021#abs:1, info:pmid/6277901#abs:1, info:pmid/697754#abs:6, info:pmid/711762#abs:1, info:pmid/731160#title:1, info:pmid/1004140#title:1, info:pmid/20854196#cont:136, info:pmid/6982710#title:1, info:pmid/12817506#body:275	2	9		Relation 1
VDR ---> TGFBR2		Expression	Expression of two genes, clusterin and TGFßRII, were found to be significantly up-regulated in VDR knockout mice (Figure 6B)., In another publication, multiple mechanisms responsible for a TGFß/1a,25(OH) 2D 3 crosstalk have been reported: ligand-binding to the VDR induces TGFß mRNA expression, the VDR enhances TGFß receptor II expression in certain cell types, Smad3 activates the VDR and the cros…	info:pmid/21298063#body:252, info:pmid/16919603#body:160	2	2		PPI with vit D and Rec, Relation 1
25(OH)D3 --+> VDR		Expression	Calcitriol and calcidiol induced VDR expression in the presence of aldo with EC(50) at 0.3 and 7,952 nM, respectively., Cathelicidin expression was lower in hereditary vitamin D-resistant rickets monocytes than in control monocytes. 25(OH)D3 increased significantly the expression of cathelicidin in control monocytes (2.3-fold) but only slightly in hereditary vitamin D-resistant rickets monocytes.…	info:pmid/21424825#abs:6, info:pmid/23482605#abs:8, info:pmid/7686756#title:1, info:pmid/16549446#body:167	2	4		Relation 1
25(OH)D3 --+> VDR	Skin {Organ urn:agi-ncimorgan:C0684084}, Liver {Organ urn:agi-ncimorgan:CL384198}, Brain {Organ urn:agi-ncimorgan:C1269537}	DirectRegulation	In conclusion, 25-hydroxyvitamin D(3) is an agonistic vitamin D receptor ligand with gene regulatory and anti-proliferative properties., Endocytosis of D binding protein was associated with activation of VDR by 25(OH)D3 but not 1,25(OH)(2)D3 (as measured by induction of the VDR target gene, CYP24)., In support of this suggestion, both 1alpha,25(OH)2D3 and 25(OH)D3 transactivated VDR in human mamm…	info:pmid/19944755#abs:7, info:pmid/17056796#abs:4, info:pmid/16549446#abs:6, info:pmid/24486455#body:13, info:pmid/21879235#cont:159, info:pmid/24312237#cont:363, info:embase/2013442790#cont:318, info:doi/10.1016/B978-0-12-386960-9.00014-9#body:188	2	8		Relation 1
calcitriol ---> TGFBR2		Expression	Regulation of TGF-ß RII mRNA expression by 1,25(OH)2D3and OCT ., It has been shown by Northern blot analysis and binding studies that 1,25-dihydroxyvitamin D3 and prostaglandin E2 down-regulate TßRII expression in human osteoblastic cells and human fibroblasts, respectively ., It has been shown by Northern blot analysis and binding studies that 1,25-dihydroxyvitamin D3 and prostaglandin E2down-re…	info:pmid/10409630#body:193, info:pmid/17107667#body:113, info:pmid/9516449#body:208, info:embase/2013442790#cont:206	2	4		PPI with vit D and Rec, Relation 1
calcitriol --+> DUSP1	Prostate {Organ urn:agi-ncimorgan:C1278980}	Expression	... , the induction of MKP-1 mRNA by 1,25-(OH)2D3 and the need for MKP-1 in 1,25-(OH)2D3 signaling is suggestive of a positive feedback role for MKP-1 ..., The adherent fraction of PBMCs, which contains mainly monocytes, was collected to examine MKP-1 mRNA expression. 1,25(OH)2D3 or dexamethasone individually significantly induced MKP-1 expression in both patients with steroid-sensitive asthma an…	info:pmid/22899855#cont:274, info:pmid/24418482#body:101, info:doi/10.1016/j.jaci.2011.12.490#body:7	2	3		PPI with vit D and Rec, Relation 1
calcitriol --+> ATP1B1	Hippocampus {Organ urn:agi-ncimorgan:C0019564}	Expression	Lead can inhibit Na +-K + ATPase from synaptic plasma membranes . 1,25(OH) 2D 3 can affect the expression and activity of proteins that interact with lead. 1,25(OH) 2D 3 inhibits the expression of voltage-dependent calcium channels in cultured hippocampal neurons . 1,25(OH) 2D 3 affects the calcium content and fluxes in mitochondria of skeletal muscle . 1,25(OH) 2D 3 can stimulate calmodulin synt…	info:pmid/20006704#body:26	2	1		PPI with vit D and Rec, Relation 1
calcitriol --+> JUN		Expression	Calcitriol treatment of starved, confluent cultures of MC3T3-E1 cells induced a rapid and transient stimulation of the expression of c-fos, fos-B, c-jun, and jun-B with varying kinetics., Western blotting experiments revealed that 1alpha,25-dihydroxyvitamin D3 caused a rapid and transient activation of the mitogen-activated protein kinases, extracellular signal regulated kinase 1/2 and c-Jun N-te…	info:pmid/1791829#abs:2, info:pmid/12648218#abs:4, info:pmid/9614072#abs:1, info:pmid/10585423#abs:5, info:pmid/23393334#cont:294, info:pmid/15901668#body:411, info:pmid/17161336#body:147, info:pmid/15798098#body:780, info:doi/10.1016/j.jsbmb.2006.11.005#body:51	2	9		PPI with vit D and Rec, Relation 1
calcitriol ---| H2AFX		Expression	We also observed that the H2O2-induced rise in the level of ?H2AX in lymphocytes was attenuated by 1,25-dihydroxyvitamin D3.	info:pmid/22498490#abs:5	2	1		PPI with vit D and Rec, Relation 1
calcitriol ---| BRCA2		Regulation	In prostate cancer cells, cyclin K and AKAP12 were upregulated . 1,25-dihydroxyvitamin D3 downregulated cyclin D1 and cell division cycle6 in mouse osteoblasts (12 h) , BRCA2 and MAPK5 in breast cancer cells (6 h and 24 h) , and cell division cycle2 in prostate cancer cells (6 h and 24 h) .	info:pmid/19454332#body:243	2	1		PPI with vit D and Rec, Relation 1
ANXA2 ---- calcitriol	Intestines {Organ urn:agi-ncimorgan:C0021853}	Binding	The data indicate that 1alpha,25-(OH)(2)D(3) binding to annexin II is specific and suggest that the binding site may be located on the carboxy terminal domain of the protein., Binding of 1alpha,25-dihydroxyvitamin D(3) to annexin II: Effect of vitamin D metabolites and calcium., In fact, two preliminary reports indicate that annexin II, a membrane-associated calcium-binding protein, may bind 1,25…	info:pmid/11074597#abs:10, info:pmid/12648218#body:318, info:pmid/12637589#body:324, info:pmid/15272054#body:69, info:pmid/15225782#body:96, info:pmid/12114317#body:190	2	6		PPI with vit D and Rec, Relation 1
calcitriol --+> ANXA2	Bone Marrow {Organ urn:agi-ncimorgan:C0005953}	Expression	Our data demonstrate that annexin II expression is regulated by 1,25-(OH)2D3., It has been shown that annexin II transcript levels are clearly increased by 1a,25(OH)2D3 treatment of human bone marrow osteoclast-like cells (342)., Together, our observations imply that 1,25D3 exerts a major calciotropic effect by concomitantly increasing the S100A10, annexin 2 and epithelial Ca2+-channel expression…	info:pmid/10359570#body:303, info:pmid/12466189#body:581, info:pmid/12660155#body:232, info:doi/10.1016/j.jsbmb.2004.03.029#body:84	2	4		PPI with vit D and Rec, Relation 1
calcitriol --+> CTSD		Expression	Treatment with either retinoic acid or calcitriol enhances the steady-state levels of ctsd mRNA in a dose-dependent manner., These results suggest that in human promonocytes the rate of the transcription of cathepsin D and lysozyme genes is enhanced in the presence of calcitriol and that the regulation by the hormone of the transcription of lysozyme gene involves a short-lived or an induced prote…	info:pmid/7547509#abs:3, info:pmid/2590170#abs:6, info:pmid/17254776#body:26	2	3		PPI with vit D and Rec, Relation 1
calcitriol --+> G6PD	Kidney {Organ urn:agi-ncimorgan:C1278978}, Villus {Organ urn:agi-ncimorgan:C1519988}, Metatarsal bone {Organ urn:agi-ncimorgan:C0025584}, Liver {Organ urn:agi-ncimorgan:CL384198}, Duodenum {Organ urn:agi-ncimorgan:C1278921}	Regulation	These results indicate that G6PD is activated by 1,25(OH)2D3 via new protein synthesis, and that the extracellular calcium plays a crucial role in the regulation of this enzyme activity., Intraperitoneal administration of 1,25(OH)2D3 (500 pmol) to vitamin D-deficient animals resulted in increased G6PD activity within 30 min (4.09 +/- 0.38 vs. 5.51 +/- 0.39 A585.min-1.micron-3 X 10(5), P less than…	info:pmid/3144322#abs:4, info:pmid/2596609#abs:6, info:pmid/2752532#abs:4, info:pmid/3498842#abs:2, info:pmid/22168439#cont:200, info:pmid/20149622#body:120	2	6		PPI with vit D and Rec, Relation 1
BRCA2 ---> transcription activation	Breast {Organ urn:agi-ncimorgan:C0006141}	Regulation	BRCA2 co-activates Smad3-dependent transcriptional activation of luciferase reporter and expression of plasminogen activator inhibitor-1 (PAI-1)., Our results further substantiate the notion that BRCA2 has transcriptional activation function and suggest that one mechanism by which BRCA2 regulates transcription may be through the recruitment of histone-modifying activity of the P/CAF co-activator.…	info:pmid/12165866#abs:7, info:pmid/9824164#abs:8, info:pmid/10843985#body:47	2	3		Neighbors of transcription activation, Relation 1
DUSP1 ---> transcription activation	zona glomerulosa {Organ urn:agi-ncimorgan:C0043518}	Regulation	... gene expression by ACTH involves a cyclic pattern of steroidogenic factor 1-dependent transcriptional activation, a dynamic that could be modulated by MKP-1 ..., ... , activation of the cAMP/protein kinase A (PKA) signaling pathway leads to a robust expression of MKP-1, which is required for transcriptional activation ..., As a nuclear dual-specificity phosphatase, MKP-1 is well poised to dep…	info:pmid/21558315#cont:356, info:pmid/17690170#body:73, info:pmid/18922965#body:803, info:pmid/17622575#body:170, info:pmid/12456655#body:198, info:pmid/10473620#body:190	2	6		Neighbors of transcription activation, Relation 1
TTK ---| DNA Damage		Regulation	G, expression of TTK-kinase-dead in cells diminishes the induction of Thr-68 phosphorylation on endogenous CHK2 by DNA damage. 293T cells were transiently transfected with HA-tagged TTK-kinase-dead or mock-transfected for about 45 h before irradiation with x-rays (left panels) or UV light (right panels).	info:pmid/15618221#body:212	2	1		Neighbors of DNA Damage, Relation 1
CENPF ---> transcription activation		Regulation	Binding of Mitosin to the ATF4-DNA Complex-ATF4 mediates transcriptional activation by binding to the cAMP-responsive elements (15, 28).	info:pmid/15677469#body:173	2	1		Neighbors of transcription activation, Relation 1
CLOCK ---> DNA Damage	Kidney {Organ urn:agi-ncimorgan:C1278978}	Regulation	Recent exciting data reported within the last year or so have now established a molecular link between specific biological clock proteins and factors that control the mammalian cell cycle and DNA damage checkpoints., Although the genes responsible for reduced B cell proliferation after chemotherapy in Clock mutants were not identified, our present results suggest that CLOCK-mediated up-regulation…	info:pmid/17492458#abs:7, info:pmid/17360649#body:194	2	2		Neighbors of DNA Damage, Relation 1
RAD18 ---| malignant transformation	Breast {Organ urn:agi-ncimorgan:C0006141}	Regulation	Therefore, it is plausible that mutation in the hRAD18 gene enhances subsequent mutation rates in some oncogenes and tumor suppressor genes, thus promoting progression of malignant transformation.	info:pmid/10884424#body:197	2	1		Neighbors of malignant transformation, Relation 1
NOTCH2 ---> transcription activation	Prostatic epithelium {Organ urn:agi-ncimorgan:C1179826}	Regulation	In Fig. 7B we show that Wnt-1 also has a positive effect on the Notch2-IC-mediated transcriptional activation of the wild type 4xRBP-jkappa promoter, whereas neither Notch2-IC nor Wnt-1 had any effect on the mutated promoter., In conclusion, the present study demonstrates that phenethyl isothiocyanate treatment promotes cleavage of Notch1 and Notch2 leading to their transcriptional activation in …	info:pmid/12794074#body:274, info:pmid/22039516#cont:196, info:pmid/18665263#body:140	2	3		Neighbors of transcription activation, Relation 1
CEBPD ---> DNA Damage		Regulation	These data suggest that C/EBPd prevents DNA damage in part by controlling cyclin D1 protein levels., Here, we report that C/EBPd augments cell survival after DNA damage from interstrand cross-linkers by facilitating nuclear import of FANCD2.	info:pmid/20439707#body:89, info:pmid/20805509#cont:32	2	2		Neighbors of DNA Damage, Relation 1
TTK --+> transcription activation		Regulation	In cell-free transcription assays, TTK restored transactivator protein-mediated transcription activation of HIV-1 long tandem repeat in nuclear extracts immunodepleted of CDK9, but not in the extracts depleted of both CDK9 and CDK7.	info:pmid/12049628#body:55	2	1		Neighbors of transcription activation, Relation 1
PDPK1 --+> DNA Damage		Regulation	Not only was DNA-PK required for Ser473 phosphorylation, but also this study showed that PDK1 was necessary for the observed Thr308 phosphorylation of PKB following irradiation of cells to induce DNA damage [37].	info:pmid/18842113#body:161	2	1		Neighbors of DNA Damage, Relation 1
DUSP1 ---> prostate carcinoma		Regulation	If MKP-1 modulation can lead to the control of hormone-refractory prostate carcinomas, finding an agent that bypasses the need for hormonal treatment, without stimulating mitogenesis, may be within reach.	info:pmid/18922965#body:1056	2	1		Relation 1
ZNF143 ---> DNA Damage	Fingers {Organ urn:agi-ncimorgan:C0016129}	Regulation	These results suggest ZNF93, ZNF143 as well as other zinc finger proteins may be involved uniquely in DNA repair pathway following DNA damage by ET-743, PM00104, and cisplatin.	info:pmid/19742314#body:353	2	1		Neighbors of DNA Damage, Relation 1
calcitriol ---> HSPA8		DirectRegulation	The ability of increasing concentrations of 25OHD3 and 1,25-(OH)2D3 to displace 5 nmol/L [3H]25OHD3 from hsp-70 and hsc-70, respectively, is shown in the ..., ... [3H]1,25(OH) 2D3 to hsc70 in solution in the absence (open boxes) or presence (closed boxes) of 2.0 mM ATP; the inset depicts untransformed total and ..., ATP also modulates the binding of 1,25(OH)2D3 to hsc70, but in this case hormone …	info:pmid/9543154#body:87, info:pmid/16141393#body:104, info:pmid/17693608#body:65	2	3		PPI with vit D and Rec, Relation 1
calcitriol --+> CEBPD		DirectRegulation	Moreover, we found that 1,25(OH)2D3 induced C/EBPdelta in other cancer cells, including the estrogen receptor -expressing MCF-7 and T47D breast cancer cells that are sensitive to the growth inhibitory effects of 1,25(OH)2D3., C/EBPß and C/EBPd but not C/EBPa are induced by 1,25(OH)2D3 in osteoblastic cells and, together with VDR, have a role in regulating osteocalcin transcription (52, 53).	info:pmid/15930295#abs:5, info:pmid/19054766#body:314	2	2		PPI with vit D and Rec, Relation 1
25(OH)D3 ---- HSPA8		Binding	Previously, we demonstrated the ability of hsc70 to bind 25-hydroxyvitamin D3 (25-OHD3) and 1,25-dihydroxyvitamin D3 (1,25(OH)2D3).	info:pmid/17693608#abs:2	2	1		Relation 1
PDPK1 --+> Prostate Cancer		Regulation	Both transient PDK1 downregulation (Fig. 2A) and chemical PDK1 inhibition (Fig. 2B) strongly inhibited the EGF-induced but not the ATP-mediated calcium increase in prostate cancer cells PC3.	info:pmid/22454520#cont:65	2	1		Neighbors of Prostate Cancer, Relation 1
E2F7 ---| transcription activation		Regulation	Furthermore, we noted that cosuppression of p107 and p130 are not able to cooperate with retinoblastoma protein loss to bypass oncogene-induced senescence (A Chicas and SW Lowe, unpubl.) Perhaps, instead, E2F7 competes with the activating E2Fs (E2F1–3) for promoter occupancy of E2F target genes to prevent the transcriptional activation.	info:pmid/22802529#cont:269	2	1		Neighbors of transcription activation, Relation 1
ZBTB1 ---| transcription activation		Regulation	ZBTB1 represses CRE-mediated transcriptional activation	info:pmid/21706167#cont:130	2	1		Neighbors of transcription activation, Relation 1
E2F7 ---> DNA Damage		Regulation	Importantly, induction of E2F7 during G(0)-G(1)/S resulted in S-phase arrest and DNA damage, whereas expression of E2F7 during G(2)/M failed to disturb cell cycle progression., Ablation of E2F7 impairs the down-regulation of E2F1 but not CDC25C after DNA damage (Fig. 5A).	info:pmid/22180533#abs:6, info:pmid/22802528#cont:206	2	2		Neighbors of DNA Damage, Relation 1
PDPK1 ---> malignant transformation		Regulation	Phosphoinositide-dependent kinase 1 controls migration and malignant transformation but not cell growth and proliferation in PTEN-null lymphocytes., Furthermore, it has been shown that PDK1 controls migration and malignant transformation but not cell growth and proliferation in PTEN-null lymphocytes [37].	info:pmid/19808258#title:1, info:pmid/21568903#cont:102	2	2		Neighbors of malignant transformation, Relation 1
H2AFX ---| malignant transformation		Regulation	Histone H2AX is required to maintain genomic stability in cells and to suppress malignant transformation of lymphocytes in mice., The histone H2A variant H2AX is important in the cellular response to DNA double strand breaks and is required to maintain genomic integrity and suppress malignant transformation.1	info:pmid/17855626#abs:1, info:pmid/20948284#cont:4	2	2		Neighbors of malignant transformation, Relation 1
PGRMC1 ---> DNA Damage		Regulation	One of these pathways may protect heme from chemical-induced damage, as this mechanism has been proposed for PGRMC1-mediated resistance to DNA damage (Rohe ...	info:pmid/21639828#cont:245	2	1		Neighbors of DNA Damage, Relation 1
TRIM33 ---> DNA Damage		Regulation	TRIM33 knockdown results in DNA damage sensitivity.	info:pmid/23926104#cont:201	2	1		Neighbors of DNA Damage, Relation 1
GSG2 ---| transcription activation		Regulation	Figure 4 Histone H3T3 kinase haspin represses TBP-associated factor3-mediated transcription activation.	info:pmid/20953165#cont:426	2	1		Neighbors of transcription activation, Relation 1
VDR --+> malignant transformation	Colon {Organ urn:agi-ncimorgan:C1281569}	Regulation	... VDR is low in normal colonic epithelial cells, increases with malignant transformation and then declines with progressive tumor growth, which is correlated ...	info:pmid/23393334#cont:12	2	1		Relation 1
NOTCH2 ---> malignant transformation	Pancreas {Organ urn:agi-ncimorgan:C1278931}	Regulation	Furthermore, it was shown by Mazur et al15 that Notch2, but not Notch1, is the key regulator of pancreatic intraepithelial neoplasm progression and malignant transformation by boosting Myc signaling in Kras-driven pancreatic carcinogenesis.	info:pmid/23235341#cont:213	2	1		Neighbors of malignant transformation, Relation 1
TGFBR2 ---> DNA Damage	forestomach {Organ urn:agi-ncimorgan:C0033745}	Regulation	Stromal deletion of Tgfbr2 promotes inflammation-induced DNA damage and loss of p15 and p16.	info:pmid/23408900#cont:82	2	1		Neighbors of DNA Damage, Relation 1
MALT1 ---> transcription activation		Regulation	... transcriptional upregulation and downregulation in live progenitors (group 2) compared to apoptotic progenitors (group 3), involving factors of the ...	info:pmid/24200242#cont:189	2	1		Neighbors of transcription activation, Relation 1
ANXA2 ---| DNA Damage		Regulation	In response to genotoxic agents, cells depleted of annexin A2 show enhanced phospho-histone H2AX and p53 levels, increased numbers of p53-binding protein 1 nuclear foci and increased levels of nuclear 8-oxo-2'-deoxyguanine, suggesting that annexin A2 plays a role in protecting DNA from damage.	info:pmid/23226323#abs:5	2	1		Neighbors of DNA Damage, Relation 1
DIAPH3 ---| Prostate Cancer	Veins {Organ urn:agi-ncimorgan:C0042449}	Regulation	mediated suppression of DIAPH3 enhanced prostate cancer lung metastasis in a tail vein injection xenograft model [14].	info:pmid/23024796#cont:29	2	1		Neighbors of Prostate Cancer, Relation 1
ANXA2 ---> malignant transformation	Liver {Organ urn:agi-ncimorgan:CL384198}	Regulation	These data suggest that overexpression and tyrosine phosphorylation of ANXA2 play important roles in the malignant transformation process leading to hepatocellular carcinoma and are related to the histological grade of hepatocellular carcinoma., These data strongly indicate that ANXA2 may be involved in the malignant transformation and progression of hepatocellular carcinoma.	info:pmid/19020748#abs:11, info:pmid/23950866#cont:216	2	2		Neighbors of malignant transformation, Relation 1
ANLN ---- TTK	Cerebral cortex {Organ urn:agi-ncimorgan:C0007776}	Binding	An interaction between Mps1 interacting protein-1 and anillin could explain the complexity of effects we observed with Mps1 interacting protein-1 reduction in cells.	info:pmid/21325884#cont:180	2	1		all PPI, PPI with vit D and Rec, Relation 1, relation 2 T
ANLN --+> TTK	Cerebral cortex {Organ urn:agi-ncimorgan:C0007776}	Regulation	Like reduction of anillin, decreased Mps1 interacting protein-1 levels leads to spindle oscillation, increased membrane blebbing and binucleate cells.53,55	info:pmid/21325884#cont:175	2	1		all PPI, Relation 1, relation 2 T
AXL ---> Prostate Cancer		Regulation	Together, our studies indicate that Axl plays a crucial role in prostate cancer metastasis and that GAS6 regulates the expression of Axl., Thus, Axl appears to have a crucial role in prostate cancer development and metastasis, demonstrating its importance as a potential new target for prostate cancer therapy.	info:pmid/22516347#abs:9, info:pmid/22410775#cont:36	2	2		Neighbors of Prostate Cancer, Relation 1
DUSP1 ---> Prostate Cancer		Regulation	Thus, MKP-1 overexpression in prostate cancer may play a role in promoting prostate carcinogenesis by inhibiting FasL-induced cell death.	info:pmid/10544965#abs:7	2	1		Neighbors of Prostate Cancer, Relation 1
CTSD ---> prostate carcinoma		Regulation	The accumulation of chromogranin A and cathepsin D gene products may be important in prostate carcinoma progression.	info:pmid/9392333#abs:1	2	1		Relation 1
H2AFX ---> transcription activation		Regulation	Within hours following recombinant adeno-associated virus transduction, host DNA damage signaling was elicited as measured by increased gamma-H2AX, ser15-p53 phosphorylation, and subsequent p53-dependent transcriptional activation.	info:pmid/22114676#abs:4	2	1		Neighbors of transcription activation, Relation 1
CTSD ---> malignant transformation	Skin {Organ urn:agi-ncimorgan:C0684084}	Regulation	Data from our and previous reports strongly supports a notion that the upregulation of cathepsin D may be critically involved in the malignant transformation and progression of melanocytic tumors.	info:pmid/24511668#abs:7	2	1		Neighbors of malignant transformation, Relation 1
VDR ---> AKR1C1		Regulation	Real-Time PCR analysis revealed that VDR mediated significant regulation of CYP3A4, CYP3A5, CYP3A43, AKR1C1-3, UGT2B15/17, and HSD17B2.	info:pmid/24242708#abs:6	2	1		Relation 1
25(OH)D3 --+> ANXA2		DirectRegulation	The results indicate that annexin II may serve as a receptor for rapid actions of 1alpha, 25-dihydroxyvitamin D(3).	info:pmid/10797564#abs:7	2	1		Relation 1
25(OH)D3 ---> G6PD	Metatarsal bone {Organ urn:agi-ncimorgan:C0025584}	Regulation	Thus, while they had no effect in the system alone, both 1,25(OH)2D3 and 25(OH)D3 caused a dose-dependent potentiation of PTH-stimulated glucose 6-phosphate dehydrogenase activity in the hypertrophic chondrocytes of the rat metatarsal. 1,25(OH)2D3 was about 1000 times more potent than 25(OH)D3.	info:pmid/3498842#abs:2	2	1		Relation 1
LAMB3 ---> Prostate Cancer	Lymph Nodes {Organ urn:agi-ncimorgan:C0154054}	Regulation	We found that the expression of RAS, RB, LAMB3 and Ki-67 changed in the different stages of prostate cancer.	info:pmid/23778407#abs:8	2	1		Neighbors of Prostate Cancer, Relation 1
