# Supplementary material for: 1,25-Dihydroxyvitamin D3 Suppresses Prognostic Survival Biomarkers Associated with Cell Cycle and Actin Organization in a Non-Malignant African American Prostate Cell Line
Source: Biology (Basel). 2024 May 15;13(5):346. doi: 10.3390/biology13050346 (PMC11118023; doi:10.3390/biology13050346)
Supplement: Supplementary file 1 [file biology-13-00346-s001.zip › ST5_87 DEGs with known VDREs and OSKM data.xlsx]

## Sheet: Suppl Table S5
Supplemental Table S5: RC77NE 1α,25(OH)2D3 treatment group- 87 of 1601 DEGs have known VDREs (FDR < 0.05). Gene names (Column1), TCGA KM OS (Column 2), Wang 2005- DEGs with known VDREs (Column3), Wang 2011-DEGs with known VDREs (Column 4), DEGs within dataset with known VDREs (Column 5), Log2 Fold Change (Column 6), RC77NE No treatment group (Column 7) and Treatment group (Column 8), Padj p value…
Genes	TCGA PRAD KMOS pvalue	DEGs w/ VDREs (Wang et al., 2005)	DEGs w/ VDREs (Wang et al., 2011)	RC-77N/E Vitamin D DEGs	RC-77N/E Vitamin D DEGs log2foldchange	RC-77 N/E NoTx avgTPM	RC-77N/E Tx avgTPM	padj
AARS	0.902	1	0	1	0.252755	303.554	362.246	0.0309545
ABHD2	0.366	1	0	1	-0.555858	82.8913	56.9987	0.000126108
ACSL1	0.711	1	0	1	0.60276	177.606	269.804	4.71e-07
AKAP12	0.198	0	1	1	-0.635048	41.4798	26.9701	5.66e-05
AKR1C1	0.167	0	1	1	1.01886	6.35312	15.8867	0.00223371
ALDH1A3	0.464	0	1	1	0.299936	67.7344	83.0435	0.0329728
ANLN	0.0402	1	1	1	-0.422378	329.09	254.479	0.00122761
ANXA2	0.7	0	1	1	-0.586639	3398.21	2243.87	0.00841802
APPBP2	0.65	0	1	1	-0.559404	26.3863	20.1486	0.00458373
ASPM	0.234	0	1	1	-0.373858	47.455	36.6562	0.00127215
ATP1B1	0.642	0	1	1	-0.771514	151.939	103.121	7.02e-09
AXL	0.797	1	0	1	-0.545783	69.3472	47.441	0.00114939
BRCA2	0.078	0	1	1	-0.441555	18.6283	14.8865	0.0230501
BRIP1	0.183	0	1	1	-0.802809	14.8606	7.66474	0.000118681
BTBD1	0..756	1	0	1	-0.311536	84.2282	71.4186	0.0225105
BTG2	0.0488	0	1	1	0.563588	17.5623	26.0296	0.0245391
C10orf118	NA	1	0	1	-0.485264	37.3408	27.0806	0.00205002
CDC42EP3	0.484	0	1	1	-0.395655	67.0919	50.0753	0.0246663
CEBPD	0.398	0	1	1	1.03635	14.2461	29.2888	0.000234332
CENPF	0.37	0	1	1	-0.304331	82.545	67.1841	0.00517645
CKAP4	0.117	1	0	1	0.932164	43.682	73.5578	5.47e-09
CLOCK	0.637	1	0	1	-0.393106	34.3678	30.7539	0.00166927
CTSD	0.6	1	0	1	0.535723	297.443	433.244	0.000118273
DDB2	0.638	0	1	1	0.494299	33.4411	46.1175	0.00777765
DEPDC1	0.455	0	1	1	-0.659407	73.1565	45.9418	0.00165622
DIAPH3	0.196	0	1	1	-0.530789	46.3953	32.0666	0.000250309
DUSP1	0.214	0	1	1	0.795391	22.1485	38.5945	0.0226459
E2F7	0.961	1	1	1	-0.439277	124.311	89.4926	0.00435599
ECT2	0.0414	1	1	1	-0.561661	157.723	116.185	0.000325072
EEF2K	0.471	1	0	1	0.623363	5.53216	6.4625	0.0350738
EMP1	0.523	0	1	1	-0.61095	261.957	165.826	2.84e-05
ESPL1	0.0754	0	1	1	0.498699	21.9629	28.1277	0.00468319
FEM1B	0.683	1	0	1	-0.297248	79.6892	70.7306	0.0230501
FGD4	0.452	0	1	1	-0.660749	22.9922	19.6311	0.0416155
FGF5	0.513	1	0	1	-0.823608	7.26647	4.12622	0.00102564
FXYD3	0.441	0	1	1	0.572841	168.969	278.374	0.00156726
G6PD	0.837	0	1	1	0.330629	50.1838	66.0772	0.0262396
GALNT1	0.898	1	0	1	-0.477701	59.9032	42.5608	0.00269336
GSG2	0.092	0	1	1	0.766484	5.07109	8.66059	0.0235858
H2AFX	0.804	0	1	1	0.377062	80.5745	102.581	0.0492127
HSPA8	0.578	1	0	1	0.74106	96.1689	168.049	0.00348516
ITGB6	0.8	0	1	1	-1.0347	92.8777	42.1703	2.6e-12
ITPKC	0.768	0	1	1	0.522934	14.4701	20.4385	0.0107772
JAG1	0.639	1	0	1	-0.315601	177.537	142.874	0.00410043
JUN	0.633	1	0	1	-0.341664	70.1025	55.4373	0.0437342
KIAA0101	0.535	0	1	1	-0.677357	64.5726	39.9896	0.00196714
KIF11	0.627	0	1	1	-0.424603	71.5772	53.4204	0.0112433
LAMB3	0.899	0	1	1	-0.283116	797.591	668.146	0.00193522
LIMS1	0.235	0	1	1	-0.952879	132.27	89.082	0.0439645
MALT1	0.254	0	1	1	-0.416661	44.7954	35.0104	0.031084
MOSPD2	0.602	1	0	1	-0.335619	30.9202	30.7092	0.0457725
MOV10	0.973	1	0	1	0.54555	23.4165	26.1563	0.0495978
MTF1	0.161	1	0	1	-0.452451	22.0904	16.16	0.0199358
NAV3	0.224	0	1	1	-0.867424	25.6341	11.026	0.011354
NOTCH2	0.76	1	0	1	-0.554493	55.6091	38.6261	1.68e-05
PDGFC	0.467	1	0	1	-0.513308	21.5976	17.815	0.00662588
PDPK1	0.183	1	0	1	-1.29122	29.7785	24.5309	0.0467907
PGRMC1	0.831	1	0	1	-0.290837	111.53	91.3671	0.0244343
PKP2	0.77	0	1	1	-0.716357	73.3166	45.2158	0.000319493
PPP1R14C	0.953	0	1	1	-0.266846	146.376	121.982	0.0379874
PVRL4	0.989	1	0	1	0.959948	19.3532	38.1965	0.000456929
PYGM	0.445	1	0	1	-0.771977	17.3815	11.6331	0.00630608
RAB23	0.2	0	1	1	-0.426476	45.2453	32.1634	0.0247823
RAD18	0.116	1	0	1	-0.458863	25.8487	18.7118	0.00223331
RGS17	0.0538	0	1	1	-0.807161	4.97025	3.4827	0.00107487
RTTN	0.625	0	1	1	-0.456583	80.0621	61.7722	0.0116765
SECTM1	0.798	0	1	1	1.02274	5.21438	10.0809	0.00885431
SERP1	0.576	1	0	1	-0.297745	60.8954	47.8572	0.0418831
SGOL2	0.756	0	1	1	-0.542973	50.8607	35.2619	0.00581503
SLC4A2	0.424	1	0	1	0.415297	65.7857	88.4491	0.00617505
SNAPC1	0.5	0	1	1	-0.677834	92.7003	58.0846	5.24e-05
SP4	0.933	0	1	1	-0.361281	14.8412	11.2131	0.0379232
STARD4	0.951	0	1	1	-0.460314	165.163	148.344	2.03e-06
STK17B	0.411	0	1	1	-0.698042	57.4573	35.2869	2.84e-07
TBC1D8	0.633	0	1	1	0.464738	31.9783	44.1976	0.0129406
TGFBR2	0.491	0	1	1	-0.270285	122.973	102.143	0.0493328
TM4SF1	0.751	0	1	1	-0.82282	79.9326	45.0211	0.0285468
TNFAIP3	0.893	0	1	1	-0.649781	104.206	62.3767	0.000922427
TOR1AIP2	0.426	0	1	1	-0.501717	79.147	57.4549	2.52e-06
TRIM33	0.923	1	0	1	-0.305372	47.2873	35.7567	0.024249
TTK	0.791	0	1	1	-0.543677	112.2	82.5897	0.000694389
TUBGCP6	0.498	1	0	1	0.801863	6.21	10.5019	0.0111536
ZBED3	0.376	1	0	1	0.431159	8.59987	11.0687	0.0493838
ZBTB1	0.495	1	0	1	-0.497553	63.8985	46.727	0.0435226
ZNF143	0.986	1	0	1	-0.571296	57.0325	35.3072	0.0360432
ZNF24	0.794	1	0	1	-0.455042	60.1963	43.5406	0.000168534
ZNF554	0.724	1	0	1	0.915445	5.12689	11.2596	0.0170168
Wang W.L. CN, Chittur S.V, Welsh J. and Tenniswood M.P. : Effects of 1 alpha, 25 dihydroxyvitamin D3 and testosterone on miRNA snd mRNA expression in LNCaP cells. Mol Cancer 2011, 10:58.
Wang T-T, Tavera-Mendoza LE, Laperriere D, Libby E, Burton MacLeod N, Nagai Y, Bourdeau V, Konstorum A, Lallemant B, Zhang R et al: Large-Scale in Silico and Microarray-Based Identification of Direct 1,25-Dihydroxyvitamin D3 Target Genes. Molecular Endocrinology 2005, 19(11):2685-2695.
