# Supplementary material for: 1,25-Dihydroxyvitamin D3 Suppresses Prognostic Survival Biomarkers Associated with Cell Cycle and Actin Organization in a Non-Malignant African American Prostate Cell Line
Source: Biology (Basel). 2024 May 15;13(5):346. doi: 10.3390/biology13050346 (PMC11118023; doi:10.3390/biology13050346)
Supplement: Supplementary file 1 [file biology-13-00346-s001.zip › ST6_VDRE DEGs Top20 canonical pathways.xlsx]

## Sheet: Suppl Table S6
Supplemental Table S6: RC-77NE 1α,25(OH)2D3 associated DEGs with VDREs in are enriched in top canonical pathways (Padj <0.05).
DEGs	Gene Name	log2 fold change	padj	Significantly enriched canonical pathway(s)
ACSL1†	Acyl-CoA synthetase long chain family member 1	0.603	< 0.0001	Ethanol Degradation IV; Mitochondrial L-carnitine Shuttle Pathway; Oxidative Ethanol Degradation III; Type II Diabetes Mellitus Signaling
AKAP12‡	A-kinase anchoring protein 12	-0.635	< 0.0001	Protein Kinase A Signaling
AKR1C1‡	Aldo-keto reductase family 1 member C1	1.019	0.0022	RAR Activation
ALDH1A3‡	Aldehyde dehydrogenase 1 family member A3	0.3	0.033	Aryl Hydrocarbon Receptor Signaling; Ethanol Degradation IV; Oxidative Ethanol Degradation III; RAR Activation; Xenobiotic Metabolism Signaling
ANLN‡	Anillin actin binding protein	-0.422	0.0012	RHOA Signaling
ANXA2‡	Annexin A2	-0.587	0.0084	Osteoarthritis Pathway
AXL†	AXL receptor tyrosine kinase	-0.546	0.0011	IL-15 Production; Sperm Motility
BRCA2‡	BRCA2 DNA repair associated	-0.442	0.0231	Hereditary Breast Cancer Signaling; Ovarian Cancer Signaling; Pancreatic Adenocarcinoma Signaling
CDC42EP3‡	CDC42 effector protein 3	-0.396	0.0247	RHOA Signaling; Signaling by Rho Family GTPases
CEBPD‡	CCAAT enhancer binding protein delta	1.036	0.0002	Adipogenesis pathway; IL-17A Signaling in Fibroblasts; Role of Macrophages, Fibroblasts and Endothelial Cells in Rheumatoid Arthritis; Unfolded protein response
CKAP4†	Cytoskeleton associated protein 4	0.932	< 0.0001	Actin Cytoskeleton Signaling
CLOCK†	Clock circadian regulator	-0.393	0.0017	Adipogenesis pathway; PPARα/RXRα Activation
CTSD†	Cathepsin D	0.536	0.0001	Aryl Hydrocarbon Receptor Signaling; Ceramide Signaling; Huntington's Disease Signaling; Phagosome Maturation
DDB2‡	Damage specific DNA binding protein 2	0.494	0.0078	Hereditary Breast Cancer Signaling
DIAPH3‡	Diaphanous related formin 3	-0.531	0.0003	Actin Cytoskeleton Signaling; Cardiac Hypertrophy Signaling (Enhanced); CDC42 Signaling; Signaling by Rho Family GTPases
DUSP1‡	Dual specificity phosphatase 1	0.795	0.0226	3-phosphoinositide Biosynthesis; Aldosterone Signaling in Epithelial Cells; D-myo-inositol (1,4,5,6)-Tetrakisphosphate Biosynthesis; D-myo-inositol (3,4,5,6)-tetrakisphosphate Biosynthesis; D-myo-inositol-5-phosphate Metabolism; ERK/MAPK Signaling; Glucocorticoid Receptor Signaling; Protein Kinase A Signaling; RAR Activation; Superpathway of Inositol Phosphate Compounds
E2F7†‡	E2F transcription factor 7	-0.439	0.0044	Cell Cycle: G1/S Checkpoint Regulation; Chronic Myeloid Leukemia Signaling; Coronavirus Pathogenesis Pathway; Glioblastoma Multiforme Signaling; Glioma Signaling; Molecular Mechanisms of Cancer; Pancreatic Adenocarcinoma Signaling; Senescence Pathway
ECT2†‡	Epithelial cell transforming 2	-0.562	0.0003	Epithelial Adherens Junction Signaling
EEF2K†	Eukaryotic elongation factor 2 kinase	0.623	0.0351	p70S6K Signaling
EMP1‡	Epithelial membrane protein 1	-0.611	< 0.0001	Ferroptosis Signaling Pathway
ESPL1‡	Extra spindle pole bodies like 1, separase	0.499	0.0047	Kinetochore Metaphase Signaling Pathway
FGF5†	Fibroblast growth factor 5	-0.824	0.001	Actin Cytoskeleton Signaling; Bladder Cancer Signaling; Cardiac Hypertrophy Signaling (Enhanced); Clathrin-mediated Endocytosis Signaling; FGF Signaling; Regulation of the Epithelial-Mesenchymal Transition Pathway; Role of Tissue Factor in Cancer; Tumor Microenvironment Pathway
H2AFX‡	H2A.X variant histone	0.377	0.0492	ATM Signaling; Ferroptosis Signaling Pathway; Hereditary Breast Cancer Signaling; Kinetochore Metaphase Signaling Pathway
HSPA8†	Heat shock protein family A (Hsp70) member 8	0.741	0.0035	Aldosterone Signaling in Epithelial Cells; Clathrin-mediated Endocytosis Signaling; Glucocorticoid Receptor Signaling; HIF1α Signaling; Huntington's Disease Signaling; Natural Killer Cell Signaling; Protein Ubiquitination Pathway; Role of PKR in Interferon Induction and Antiviral Response; Unfolded protein response
ITGB6‡	Integrin subunit beta 6	-1.035	< 0.0001	Actin Cytoskeleton Signaling; Actin Nucleation by ARP-WASP Complex; Axonal Guidance Signaling; Cardiac Hypertrophy Signaling (Enhanced); Caveolar-mediated Endocytosis Signaling; CDC42 Signaling; Clathrin-mediated Endocytosis Signaling; Ephrin Receptor Signaling; ERK/MAPK Signaling; FAK Signaling; Hepatic Fibrosis Signaling Pathway; HER-2 Signaling in Breast Cancer; HGF Signaling; ILK Signaling; I…
ITPKC‡	Inositol-triphosphate 3-kinase C	0.523	0.0108	D-myo-inositol (1,3,4)-trisphosphate Biosynthesis; Superpathway of D-myo-inositol (1,4,5)-trisphosphate Metabolism; Superpathway of Inositol Phosphate Compounds
JAG1†	Jagged canonical Notch ligand 1	-0.316	0.0041	Notch Signaling; Osteoarthritis Pathway; Regulation of the Epithelial-Mesenchymal Transition Pathway
JUN†	Jun proto-oncogene, AP-1 transcription factor subunit	-0.342	0.0437	14-3-3-mediated Signaling; 4-1BB Signaling in T Lymphocytes; Acute Phase Response Signaling; Agrin Interactions at Neuromuscular Junction; Apelin Endothelial Signaling Pathway; Aryl Hydrocarbon Receptor Signaling; ATM Signaling; B Cell Receptor Signaling; BMP signaling pathway; Cardiac Hypertrophy Signaling; Cardiac Hypertrophy Signaling (Enhanced); CD27 Signaling in Lymphocytes; CD28 Signaling i…
LAMB3‡	Laminin subunit beta 3	-0.283	0.0019	CDK5 Signaling; GP6 Signaling Pathway
LIMS1‡	LIM zinc finger domain containing 1	-0.953	0.044	ILK Signaling; Integrin Signaling; PI3K/AKT Signaling
MALT1‡	MALT1 paracaspase	-0.417	0.0311	B Cell Receptor Signaling; CD28 Signaling in T Helper Cells; PI3K Signaling in B Lymphocytes; Regulation of IL-2 Expression in Activated and Anergic T Lymphocytes; Systemic Lupus Erythematosus In B Cell Signaling Pathway; T Cell Receptor Signaling
MTF1†	Metal regulatory transcription factor 1	-0.452	0.0199	Osteoarthritis Pathway
NOTCH2†	Notch receptor 2	-0.554	< 0.0001	Epithelial Adherens Junction Signaling; Notch Signaling; Regulation of the Epithelial-Mesenchymal Transition Pathway
PDGFC†	Platelet derived growth factor C	-0.513	0.0066	Actin Cytoskeleton Signaling; Bladder Cancer Signaling; Clathrin-mediated Endocytosis Signaling; Colorectal Cancer Metastasis Signaling; Endocannabinoid Cancer Inhibition Pathway; Ephrin Receptor Signaling; Estrogen Receptor Signaling; Glioblastoma Multiforme Signaling; Glioma Signaling; Hepatic Fibrosis/Hepatic Stellate Cell Activation; Hepatic Fibrosis Signaling Pathway; HIF1α Signaling; IL-17 …
PDPK1†	3-phosphoinositide dependen protein kinase	-1.291	0.0468	Acute Phase Response Signaling; Aldosterone Signaling in Epithelial Cells; B Cell Receptor Signaling; CD28 Signaling in T Helper Cells; Docosahexaenoic Acid (DHA) Signaling; EIF2 Signaling; Endometrial Cancer Signaling; ERB2-ERBB3 Signaling; ERBB4 Signaling; FAK Signaling; Fc Epsilon RI Signaling; FcγRIIB Signaling in B Lymphocytes; FLT3 Signaling in Hematopoietic Progenitor Cells; G Beta Gamma S…
PPP1R14C‡	Protein phosphatase 1 regulatory inhibitor subunit 14C	-0.267	0.038	3-phosphoinositide Biosynthesis; CDK5 Signaling; D-myo-inositol (1,4,5,6)-Tetrakisphosphate Biosynthesis; D-myo-inositol (3,4,5,6)-tetrakisphosphate Biosynthesis; D-myo-inositol-5-phosphate Metabolism; ERK/MAPK Signaling; HIPPO signaling; Insulin Receptor Signaling; Kinetochore Metaphase Signaling Pathway; Protein Kinase A Signaling; Superpathway of Inositol Phosphate Compounds; Synaptic Long Ter…
PYGM†	Glycogen phosphorylase, muscle associated	-0.772	0.0063	Protein Kinase A Signaling
RGS17‡	Regulator of G protein signaling 17	-0.807	0.0011	Opioid Signaling Pathway
TGFBR2‡	Transforming growth factor beta receptor 2	-0.27	0.0493	Cardiac Hypertrophy Signaling; Cardiac Hypertrophy Signaling (Enhanced); Chronic Myeloid Leukemia Signaling; Colorectal Cancer Metastasis Signaling; Coronavirus Pathogenesis Pathway; Epithelial Adherens Junction Signaling; FAK Signaling; GADD45 Signaling; Germ Cell-Sertoli Cell Junction Signaling; Glucocorticoid Receptor Signaling; Hepatic Fibrosis/Hepatic Stellate Cell Activation; Hepatic Fibros…
TNFAIP3‡	TNF alpha induced protein 3	-0.65	0.0009	CD40 Signaling; TNFR1 Signaling; TNFR2 Signaling; Toll-like Receptor Signaling
TTK‡	TTK protein kinase	-0.544	0.0007	Kinetochore Metaphase Signaling Pathway; Pyridoxal 5'-phosphate Salvage Pathway; Salvage Pathways of Pyrimidine Ribonucleotides
Pathways with names in bold represent top 20 canonical pathways
†Wang 2005
‡Wang 2011
