# Supplementary material for: 1,25-Dihydroxyvitamin D3 Suppresses Prognostic Survival Biomarkers Associated with Cell Cycle and Actin Organization in a Non-Malignant African American Prostate Cell Line
Source: Biology (Basel). 2024 May 15;13(5):346. doi: 10.3390/biology13050346 (PMC11118023; doi:10.3390/biology13050346)
Supplement: Supplementary file 1 [file biology-13-00346-s001.zip › ST7_ANLN-ECT2 expression in PCa Cohort.xlsx]

## Sheet: Suppl Table S7
Supplemental Table S7: ANLN and ECT2 RNA expression in matched tumor-non-malignant prostate cohort. ID and Tissue Type (Column1), ANLN TPM (Column2), ECT2 TPM (Column 3), Transcripts per Million (TPM).
ID + Tissue Type	ANLN TPM	ECT2 TPM
APOP-001-non-malignant	36.4362	104.895
APOP-001-Tumor	19.929	99.914
APOP-002-non-malignant	23.3851	73.6274
APOP-002-Tumor	27.8025	160.772
APOP-003-non-malignant	10.9524	36.2983
APOP-003-Tumor	34.0504	144.739
APOP-004-non-malignant	18.7958	160.197
APOP-004-Tumor	43.441	169.849
APOP-006-non-malignant	8.81152	33.5603
APOP-006-Tumor	4.9659	44.783
APOP-007-non-malignant	15.8495	42.096
APOP-007-Tumor	13.7193	71.939
APOP-009-non-malignant	5.95561	71.6433
APOP-009-Tumor	12.7395	134.065
APOP-013-non-malignant	15.6561	59.6267
APOP-013-Tumor	44.2969	213.608
APOP-014-non-malignant	20.1462	27.5272
APOP-014-Tumor	39.2886	94.2251
APOP-015-non-malignant	4.74571	101.425
APOP-018-non-malignant	25.5097	132.889
APOP-018-Tumor	126.876	448.103
APOP-019-non-malignant	7.39017	72.8217
APOP-019-Tumor	21.787	125.849
APOP-020-non-malignant	156.899	64.8763
APOP-020-Tumor	104.789	83.4147
APOP-021-non-malignant	45.5799	46.9666
APOP-021-Tumor	36.0913	151.651
APOP-022-non-malignant	10.4909	67.2799
APOP-022-Tumor	12.5401	90.9291
APOP-023-non-malignant	10.6179	106.394
APOP-023-Tumor	49.1722	231.764
APOP-026-non-malignant	27.2927	86.4091
APOP-026-Tumor	18.698	162.631
APOP-027-non-malignant	21.5403	63.5058
APOP-027-Tumor	42.9861	187.181
APOP-028-non-malignant	18.0394	105.775
APOP-028-Tumor	44.678	160.065
APOP-029-non-malignant	55.5739	161.158
APOP-029-Tumor	137.946	245.16
APOP-030-non-malignant	30.5032	48.008
APOP-030-Tumor	19.6036	114.411
APOP-031-non-malignant	86.6507	39.745
APOP-031-Tumor	259.172	269.4
APOP-032-non-malignant	17.2627	65.9948
APOP-032-Tumor	3.05349	118.39
APOP-033-non-malignant	9.2714	63.7338
APOP-033-Tumor	12.4068	134.283
APOP-034-non-malignant	4.82557	66.9237
APOP-034-Tumor	96.096	158.831
APOP-035-non-malignant	12.5523	57.1061
APOP-035-Tumor	22.6531	122.616
APOP-036-non-malignant	10.5258	30.4742
APOP-036-Tumor	21.9825	173.79
APOP-037-non-malignant	27.2042	96.3616
APOP-037-Tumor	29.5009	115.245
APOP-038-non-malignant	17.2454	50.4284
APOP-038-Tumor	18.2777	73.23
APOP-039-non-malignant	7.52105	66.7576
APOP-039-Tumor	10.7592	126.899
APOP-040-non-malignant	5.14578	105.132
APOP-040-Tumor	6.87427	113.603
APOP-043-non-malignant	18.2721	53.1739
APOP-043-Tumor	40.0112	89.0841
APOP-044-non-malignant	19.6067	54.6104
APOP-044-Tumor	16.3646	107.462
APOP-046-non-malignant	17.8529	83.122
APOP-046-Tumor	31.9545	208.252
APOP-047-non-malignant	81.1483	57.3576
APOP-047-Tumor	38.6369	53.4533
APOP-049-non-malignant	17.7248	94.5193
APOP-049-Tumor	5.60683	63.2318
APOP-050-non-malignant	14.5913	74.4634
APOP-050-Tumor	17.1142	76.4089
APOP-051-non-malignant	3.90281	38.3086
APOP-051-Tumor	27.1898	115.787
APOP-052-non-malignant	15.3042	57.4869
APOP-052-Tumor	17.3764	79.6121
APOP-053-non-malignant	7.0742	87.0751
APOP-053-Tumor	45.3431	136.345
APOP-054-non-malignant	11.1406	47.9994
APOP-054-Tumor	23.7501	81.2898
APOP-056-non-malignant	9.42534	67.3418
APOP-056-Tumor	26.4049	201.628
APOP-058-non-malignant	8.7859	35.2357
APOP-058-Tumor	19.3962	70.5027
APOP-059-non-malignant	161.756	74.6136
APOP-059-Tumor	62.5061	97.7365
APOP-063-non-malignant	17.0416	75.7847
APOP-063-Tumor	13.3361	124.726
APOP-069-non-malignant	10.8036	43.2923
APOP-069-Tumor	34.8963	78.7215
APOP-071-non-malignant	72.6578	144.441
APOP-071-Tumor	46.7723	249.732
APOP-072-non-malignant	46.5968	65.4007
APOP-072-Tumor	12.5848	100.041
APOP-073-non-malignant	24.8156	60.971
APOP-073-Tumor	28.6704	123.966
APOP-074-non-malignant	3.28609	60.1158
APOP-074-Tumor	5.33601	96.2763
APOP-075-non-malignant	33.82	61.1389
APOP-075-Tumor	21.9159	125.409
APOP-076-non-malignant	13.6936	49.2834
APOP-076-Tumor	9.87015	133.914
APOP-078-non-malignant	22.0862	133.637
APOP-078-Tumor	12.0395	75.1683
APOP-079-non-malignant	31.6783	44.736
APOP-079-Tumor	43.4969	72.5084
APOP-080-non-malignant	31.5115	58.362
APOP-080-Tumor	8.5327	147.06
APOP-081-non-malignant	11.37	44.793
APOP-081-Tumor	10.8188	63.6711
APOP-082-non-malignant	48.9074	101.296
APOP-082-Tumor	56.5915	164.273
APOP-083-non-malignant	21.2671	63.163
APOP-083-Tumor	12.3171	115.929
APOP-084-non-malignant	18.6618	43.2504
APOP-084-Tumor	10.7027	72.3878
APOP-085-non-malignant	6.72137	55.8441
APOP-085-Tumor	55.6895	313.931
APOP-086-non-malignant	22.3708	93.6141
APOP-086-Tumor	9.65869	67.6946
APOP-087-non-malignant	20.1332	72.3709
APOP-087-Tumor	49.5864	243.734
APOP-088-non-malignant	11.5657	40.5651
APOP-088-Tumor	29.8216	89.6536
APOP-089-non-malignant	13.1594	62.2771
APOP-089-Tumor	19.313	80.7033
APOP-092-non-malignant	11.431	82.8033
APOP-092-Tumor	11.1731	70.1826
APOP-094-non-malignant	11.2334	101.328
APOP-094-Tumor	12.8113	46.5434
APOP-095-non-malignant	15.8929	48.5478
APOP-095-Tumor	40.0876	132.637
APOP-096-non-malignant	10.8691	52.2765
APOP-096-Tumor	6.66209	61.5736
APOP-098-non-malignant	3.7702	52.8688
APOP-098-Tumor	13.9695	62.2511
APOP-099-non-malignant	15.7205	72.2905
APOP-099-Tumor	32.0967	72.0819
APOP-101-non-malignant	18.4622	100.311
APOP-101-Tumor	88.5759	240.518
APOP-102-non-malignant	8.27017	40.5048
APOP-102-Tumor	29.4687	111.439
APOP-103-non-malignant	24.1966	57.4056
APOP-103-Tumor	25.4073	62.2384
APOP-104-non-malignant	11.2092	96.2776
APOP-104-Tumor	38.1876	92.4475
