# Supplementary material for: 1,25-Dihydroxyvitamin D3 Suppresses Prognostic Survival Biomarkers Associated with Cell Cycle and Actin Organization in a Non-Malignant African American Prostate Cell Line
Source: Biology (Basel). 2024 May 15;13(5):346. doi: 10.3390/biology13050346 (PMC11118023; doi:10.3390/biology13050346)
Supplement: Supplementary file 1 [file biology-13-00346-s001.zip › ST8_STRING Analaysis.xlsx]

## Sheet: Sheet1
Supplemental Table S8: STRING PPI coexpression functional prediction analysis ECT2 and ANLN network analysis
#node1	node2	node1_string_id	node2_string_id	neighborhood_on_chromosome	gene_fusion	phylogenetic_cooccurrence	homology	coexpression	experimentally_determined_interaction	database_annotated	automated_textmining	combined_score
ANLN	KIF23	9606.ENSP00000265748	9606.ENSP00000260363	0	0	0	0	0.74	0.331	0	0.946	0.989
ANLN	CDC42	9606.ENSP00000265748	9606.ENSP00000497733	0	0	0	0	0.061	0.07	0	0.437	0.466
ANLN	PLK1	9606.ENSP00000265748	9606.ENSP00000300093	0	0	0	0	0.392	0	0	0.531	0.703
ANLN	CDK1	9606.ENSP00000265748	9606.ENSP00000378699	0	0	0	0	0.643	0	0	0.506	0.816
ANLN	ASPM	9606.ENSP00000265748	9606.ENSP00000356379	0	0	0	0	0.75	0.292	0	0.48	0.9
ANLN	BUB1	9606.ENSP00000265748	9606.ENSP00000302530	0	0	0	0	0.791	0	0	0.619	0.917
ANLN	KIF20A	9606.ENSP00000265748	9606.ENSP00000378356	0	0	0	0	0.823	0.328	0	0.607	0.949
ANLN	ECT2	9606.ENSP00000265748	9606.ENSP00000376457	0	0	0	0	0.444	0.292	0	0.987	0.994
ANLN	RACGAP1	9606.ENSP00000265748	9606.ENSP00000404190	0	0	0	0	0.607	0.416	0	0.99	0.997
ANLN	RHOA	9606.ENSP00000265748	9606.ENSP00000400175	0	0	0	0	0.054	0.959	0.4	0.986	0.999
ASPM	KIF23	9606.ENSP00000356379	9606.ENSP00000260363	0	0	0	0	0.967	0.3	0	0.5	0.987
ASPM	ANLN	9606.ENSP00000356379	9606.ENSP00000265748	0	0	0	0	0.75	0.292	0	0.48	0.9
ASPM	PLK1	9606.ENSP00000356379	9606.ENSP00000300093	0	0	0	0	0.455	0.091	0	0.451	0.704
ASPM	BUB1	9606.ENSP00000356379	9606.ENSP00000302530	0	0	0	0	0.907	0.111	0	0.741	0.976
ASPM	RACGAP1	9606.ENSP00000356379	9606.ENSP00000404190	0	0	0	0	0.637	0	0	0.46	0.795
ASPM	ECT2	9606.ENSP00000356379	9606.ENSP00000376457	0	0	0	0	0.826	0.292	0	0.433	0.924
ASPM	CDK1	9606.ENSP00000356379	9606.ENSP00000378699	0	0	0	0	0.827	0	0	0.682	0.942
ASPM	KIF20A	9606.ENSP00000356379	9606.ENSP00000378356	0	0	0	0	0.9	0.048	0	0.765	0.975
BUB1	KIF23	9606.ENSP00000302530	9606.ENSP00000260363	0	0	0	0	0.855	0.068	0	0.715	0.958
BUB1	ANLN	9606.ENSP00000302530	9606.ENSP00000265748	0	0	0	0	0.791	0	0	0.619	0.917
BUB1	PLK1	9606.ENSP00000302530	9606.ENSP00000300093	0	0	0	0	0.587	0.39	0.8	0.936	0.996
BUB1	CDC42	9606.ENSP00000302530	9606.ENSP00000497733	0	0	0	0	0	0	0	0.444	0.444
BUB1	RACGAP1	9606.ENSP00000302530	9606.ENSP00000404190	0	0	0	0	0.725	0	0	0.452	0.843
BUB1	ECT2	9606.ENSP00000302530	9606.ENSP00000376457	0	0	0	0	0.904	0	0	0.472	0.947
BUB1	KIF20A	9606.ENSP00000302530	9606.ENSP00000378356	0	0	0	0	0.863	0.314	0	0.601	0.959
BUB1	ASPM	9606.ENSP00000302530	9606.ENSP00000356379	0	0	0	0	0.907	0.111	0	0.741	0.976
BUB1	CDK1	9606.ENSP00000302530	9606.ENSP00000378699	0	0	0	0	0.89	0.354	0.4	0.964	0.998
CDC42	ANLN	9606.ENSP00000497733	9606.ENSP00000265748	0	0	0	0	0.061	0.07	0	0.437	0.466
CDC42	PLK1	9606.ENSP00000497733	9606.ENSP00000300093	0	0	0	0	0	0.126	0	0.348	0.406
CDC42	BUB1	9606.ENSP00000497733	9606.ENSP00000302530	0	0	0	0	0	0	0	0.444	0.444
CDC42	ECT2	9606.ENSP00000497733	9606.ENSP00000376457	0	0	0	0	0	0.364	0.4	0.817	0.924
CDC42	CDK1	9606.ENSP00000497733	9606.ENSP00000378699	0	0	0	0	0.086	0.085	0	0.412	0.466
CDC42	RHOA	9606.ENSP00000497733	9606.ENSP00000400175	0	0	0.062	0.948	0.361	0.295	0.9	0.103	0.955
CDC42	RACGAP1	9606.ENSP00000497733	9606.ENSP00000404190	0	0	0	0	0.052	0.903	0.4	0.671	0.979
CDK1	KIF23	9606.ENSP00000378699	9606.ENSP00000260363	0	0	0	0	0.808	0	0	0.57	0.914
CDK1	ANLN	9606.ENSP00000378699	9606.ENSP00000265748	0	0	0	0	0.643	0	0	0.506	0.816
CDK1	PLK1	9606.ENSP00000378699	9606.ENSP00000300093	0	0	0	0.624	0.814	0.15	0.9	0.66	0.993
CDK1	BUB1	9606.ENSP00000378699	9606.ENSP00000302530	0	0	0	0	0.89	0.354	0.4	0.964	0.998
CDK1	ASPM	9606.ENSP00000378699	9606.ENSP00000356379	0	0	0	0	0.827	0	0	0.682	0.942
CDK1	ECT2	9606.ENSP00000378699	9606.ENSP00000376457	0	0	0	0	0.774	0.071	0	0.838	0.963
CDK1	KIF20A	9606.ENSP00000378699	9606.ENSP00000378356	0	0	0	0	0.849	0	0	0.737	0.958
CDK1	CDC42	9606.ENSP00000378699	9606.ENSP00000497733	0	0	0	0	0.086	0.085	0	0.412	0.466
CDK1	RHOA	9606.ENSP00000378699	9606.ENSP00000400175	0	0	0	0	0.1	0.085	0	0.459	0.516
CDK1	RACGAP1	9606.ENSP00000378699	9606.ENSP00000404190	0	0	0	0	0.692	0.292	0	0.832	0.96
ECT2	KIF23	9606.ENSP00000376457	9606.ENSP00000260363	0	0	0	0	0.762	0.642	0.9	0.969	0.999
ECT2	ANLN	9606.ENSP00000376457	9606.ENSP00000265748	0	0	0	0	0.444	0.292	0	0.987	0.994
ECT2	PLK1	9606.ENSP00000376457	9606.ENSP00000300093	0	0	0	0	0.463	0	0	0.888	0.937
ECT2	BUB1	9606.ENSP00000376457	9606.ENSP00000302530	0	0	0	0	0.904	0	0	0.472	0.947
ECT2	ASPM	9606.ENSP00000376457	9606.ENSP00000356379	0	0	0	0	0.826	0.292	0	0.433	0.924
ECT2	KIF20A	9606.ENSP00000376457	9606.ENSP00000378356	0	0	0	0	0.752	0.071	0	0.69	0.922
ECT2	CDC42	9606.ENSP00000376457	9606.ENSP00000497733	0	0	0	0	0	0.364	0.4	0.817	0.924
ECT2	CDK1	9606.ENSP00000376457	9606.ENSP00000378699	0	0	0	0	0.774	0.071	0	0.838	0.963
ECT2	RHOA	9606.ENSP00000376457	9606.ENSP00000400175	0	0	0	0	0.05	0.382	0.4	0.915	0.966
ECT2	RACGAP1	9606.ENSP00000376457	9606.ENSP00000404190	0	0	0	0	0.529	0.88	0.9	0.998	0.999
KIF20A	KIF23	9606.ENSP00000378356	9606.ENSP00000260363	0	0	0	0.659	0.816	0.292	0.54	0.39	0.958
KIF20A	ANLN	9606.ENSP00000378356	9606.ENSP00000265748	0	0	0	0	0.823	0.328	0	0.607	0.949
KIF20A	PLK1	9606.ENSP00000378356	9606.ENSP00000300093	0	0	0	0	0.769	0.127	0.75	0.83	0.99
KIF20A	BUB1	9606.ENSP00000378356	9606.ENSP00000302530	0	0	0	0	0.863	0.314	0	0.601	0.959
KIF20A	ASPM	9606.ENSP00000378356	9606.ENSP00000356379	0	0	0	0	0.9	0.048	0	0.765	0.975
KIF20A	ECT2	9606.ENSP00000378356	9606.ENSP00000376457	0	0	0	0	0.752	0.071	0	0.69	0.922
KIF20A	CDK1	9606.ENSP00000378356	9606.ENSP00000378699	0	0	0	0	0.849	0	0	0.737	0.958
KIF20A	RACGAP1	9606.ENSP00000378356	9606.ENSP00000404190	0	0	0	0	0.757	0.837	0.8	0.732	0.997
KIF23	RHOA	9606.ENSP00000260363	9606.ENSP00000400175	0	0	0	0	0.042	0.05	0	0.711	0.714
KIF23	CDK1	9606.ENSP00000260363	9606.ENSP00000378699	0	0	0	0	0.808	0	0	0.57	0.914
KIF23	KIF20A	9606.ENSP00000260363	9606.ENSP00000378356	0	0	0	0.659	0.816	0.292	0.54	0.39	0.958
KIF23	BUB1	9606.ENSP00000260363	9606.ENSP00000302530	0	0	0	0	0.855	0.068	0	0.715	0.958
KIF23	ASPM	9606.ENSP00000260363	9606.ENSP00000356379	0	0	0	0	0.967	0.3	0	0.5	0.987
KIF23	PLK1	9606.ENSP00000260363	9606.ENSP00000300093	0	0	0	0	0.592	0.378	0.75	0.836	0.988
KIF23	ANLN	9606.ENSP00000260363	9606.ENSP00000265748	0	0	0	0	0.74	0.331	0	0.946	0.989
KIF23	RACGAP1	9606.ENSP00000260363	9606.ENSP00000404190	0	0	0	0	0.828	0.995	0.9	0.999	0.999
KIF23	ECT2	9606.ENSP00000260363	9606.ENSP00000376457	0	0	0	0	0.762	0.642	0.9	0.969	0.999
PLK1	KIF23	9606.ENSP00000300093	9606.ENSP00000260363	0	0	0	0	0.592	0.378	0.75	0.836	0.988
PLK1	ANLN	9606.ENSP00000300093	9606.ENSP00000265748	0	0	0	0	0.392	0	0	0.531	0.703
PLK1	CDC42	9606.ENSP00000300093	9606.ENSP00000497733	0	0	0	0	0	0.126	0	0.348	0.406
PLK1	RHOA	9606.ENSP00000300093	9606.ENSP00000400175	0	0	0	0	0.068	0.126	0	0.449	0.512
PLK1	ASPM	9606.ENSP00000300093	9606.ENSP00000356379	0	0	0	0	0.455	0.091	0	0.451	0.704
PLK1	ECT2	9606.ENSP00000300093	9606.ENSP00000376457	0	0	0	0	0.463	0	0	0.888	0.937
PLK1	RACGAP1	9606.ENSP00000300093	9606.ENSP00000404190	0	0	0	0	0.587	0.644	0	0.761	0.961
PLK1	KIF20A	9606.ENSP00000300093	9606.ENSP00000378356	0	0	0	0	0.769	0.127	0.75	0.83	0.99
PLK1	CDK1	9606.ENSP00000300093	9606.ENSP00000378699	0	0	0	0.624	0.814	0.15	0.9	0.66	0.993
PLK1	BUB1	9606.ENSP00000300093	9606.ENSP00000302530	0	0	0	0	0.587	0.39	0.8	0.936	0.996
RACGAP1	KIF23	9606.ENSP00000404190	9606.ENSP00000260363	0	0	0	0	0.828	0.995	0.9	0.999	0.999
RACGAP1	ANLN	9606.ENSP00000404190	9606.ENSP00000265748	0	0	0	0	0.607	0.416	0	0.99	0.997
RACGAP1	PLK1	9606.ENSP00000404190	9606.ENSP00000300093	0	0	0	0	0.587	0.644	0	0.761	0.961
RACGAP1	BUB1	9606.ENSP00000404190	9606.ENSP00000302530	0	0	0	0	0.725	0	0	0.452	0.843
RACGAP1	ASPM	9606.ENSP00000404190	9606.ENSP00000356379	0	0	0	0	0.637	0	0	0.46	0.795
RACGAP1	ECT2	9606.ENSP00000404190	9606.ENSP00000376457	0	0	0	0	0.529	0.88	0.9	0.998	0.999
RACGAP1	KIF20A	9606.ENSP00000404190	9606.ENSP00000378356	0	0	0	0	0.757	0.837	0.8	0.732	0.997
RACGAP1	CDK1	9606.ENSP00000404190	9606.ENSP00000378699	0	0	0	0	0.692	0.292	0	0.832	0.96
RACGAP1	RHOA	9606.ENSP00000404190	9606.ENSP00000400175	0	0	0	0	0.052	0.806	0.4	0.836	0.979
RACGAP1	CDC42	9606.ENSP00000404190	9606.ENSP00000497733	0	0	0	0	0.052	0.903	0.4	0.671	0.979
RHOA	KIF23	9606.ENSP00000400175	9606.ENSP00000260363	0	0	0	0	0.042	0.05	0	0.711	0.714
RHOA	ANLN	9606.ENSP00000400175	9606.ENSP00000265748	0	0	0	0	0.054	0.959	0.4	0.986	0.999
RHOA	PLK1	9606.ENSP00000400175	9606.ENSP00000300093	0	0	0	0	0.068	0.126	0	0.449	0.512
RHOA	ECT2	9606.ENSP00000400175	9606.ENSP00000376457	0	0	0	0	0.05	0.382	0.4	0.915	0.966
RHOA	CDK1	9606.ENSP00000400175	9606.ENSP00000378699	0	0	0	0	0.1	0.085	0	0.459	0.516
RHOA	CDC42	9606.ENSP00000400175	9606.ENSP00000497733	0	0	0.062	0.948	0.361	0.295	0.9	0.103	0.955
RHOA	RACGAP1	9606.ENSP00000400175	9606.ENSP00000404190	0	0	0	0	0.052	0.806	0.4	0.836	0.979
