# Supplementary material for: 1,25-Dihydroxyvitamin D3 Suppresses Prognostic Survival Biomarkers Associated with Cell Cycle and Actin Organization in a Non-Malignant African American Prostate Cell Line
Source: Biology (Basel). 2024 May 15;13(5):346. doi: 10.3390/biology13050346 (PMC11118023; doi:10.3390/biology13050346)
Supplement: Supplementary file 1 [file biology-13-00346-s001.zip › ST10_STRING Network Stats.xlsx]

## Sheet: Sheet1
Supplemental Table S10: STRING PPI netowrk analysis summary statistics
Number of Nodes	Number of Edges	Average Node Degree	avg. local clustering coefficient	expected number of Edges	PPI Enrichment p-value
11	49	8.91	0.916	17	4.57e-10
